# Supplementary material for: Photo-induced oxidative cleavage of C–C double bonds for the synthesis of biaryl methanone via CeCl3 catalysis
Source: Royal Society of Chemistry journal article supplement (doi:10.1039/d1ob01002f), 2021-01-01

Supporting information for:

**Photo-induced Oxidative Cleavage of C–C Double Bond for  
the Synthesis of Biaryl Methanone via CeCl<sub>3</sub> Catalysis**

Pan Xie,\* Cheng Xue, Dongdong Du, and SanShan Shi

College of Chemistry and Chemistry Engineering, Shaanxi Key Laboratory of Chemistry  
Additives for Industry, Shaanxi University of Science & Technology, Xi'an, China 710021.

\* Corresponding author: [pan.xie@sust.edu.cn](mailto:pan.xie@sust.edu.cn)

# Supporting Information

## List of Contents

|                                                                                |    |
|--------------------------------------------------------------------------------|----|
| 1. General Information.....                                                    | 3  |
| 2. Optimization of the reaction conditions.....                                | 3  |
| 3. General procedure for Ce-catalyzed photooxidative cleavage of olefins ..... | 7  |
| 4. Experimental characterization data for products.....                        | 7  |
| References .....                                                               | 28 |
| 5. The reaction practicability emanations .....                                | 31 |
| 5.1 Reaction at low catalyst loading .....                                     | 31 |
| 5.2 5 mmol scale reaction.....                                                 | 31 |
| 6. Mechanistic studies.....                                                    | 32 |
| 6.1 Control experiments .....                                                  | 32 |
| 6.2 Radical scavenger effect studies.....                                      | 33 |
| 6.3 Quenching experiments .....                                                | 34 |
| 6.4 <sup>18</sup> O labeling experiment.....                                   | 34 |
| 7. NMR spectra.....                                                            | 37 |

## 1. General Information

Unless otherwise indicated, all reactions and manipulations were performed under air. The photocatalytic reactions were performed on WATTCAS Parallel Light Reactor (WP-TEC-1020SL). All starting materials and solvents were purchased from Adamas-beta, Alfa Aesar, Chempur, Merck as well as Sigma Aldrich, and used without further purification, unless otherwise stated. All reactions were monitored by TLC with silica gel-coated plates. Column chromatography was carried out on silica gel, particle size 37-48  $\mu\text{m}$ , using flash techniques.  $^1\text{H}$  NMR and  $^{13}\text{C}$  NMR spectra were recorded on Bruker Ascend 400 (400 MHz) spectrometer.  $^1\text{H}$  NMR are referenced to the residual solvent peak at 7.26 ppm ( $\text{CDCl}_3$ ), and quoted in ppm to 2 decimal places with coupling constants ( $J$ ) to the nearest 0.1 Hz.  $^{13}\text{C}$  NMR spectra, recorded at 101 MHz, are referenced to the solvent peak at 77.16 ppm ( $\text{CDCl}_3$ ), and quoted in ppm to 2 decimal places with coupling constants ( $J$ ) to the nearest 1 Hz.

## 2. Optimization of the reaction conditions

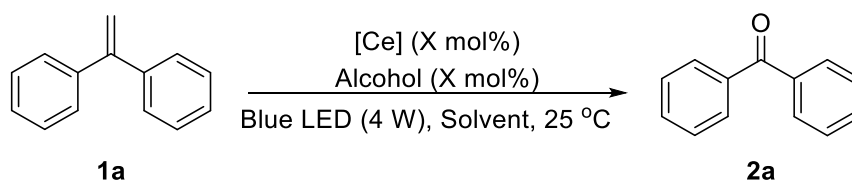

A mixture of stilbene, catalyst, additive (alcohol) and solvent were added into a quartz tube which was placed in a photochemical reactor. The

reaction mixture was stirred at the designed temperature under air. After concentrated under reduced pressure, the residue was purified by flash column chromatography on silica gel and eluted with EtOAc/petroleum ether (1/100~10/1) to afford the desired product.

**Table 1. Screening of catalysts<sup>[a]</sup>**

| 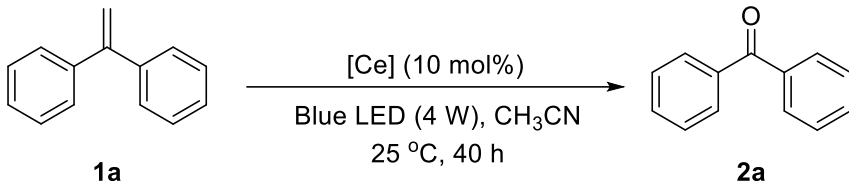 |                                           |           |
|------------------------------------------------------------------------------------|-------------------------------------------|-----------|
| Entry                                                                              | Ce(10mol%)                                | Yield (%) |
| 1                                                                                  | -                                         | 0         |
| 2                                                                                  | CeCl <sub>3</sub>                         | 52        |
| 3                                                                                  | CeBr <sub>3</sub>                         | 42        |
| 4                                                                                  | Ce(acac) <sub>3</sub> . xH <sub>2</sub> O | 35        |
| 5                                                                                  | Ce (OAc) <sub>3</sub>                     | 38        |
| 6                                                                                  | Ce (OTf) <sub>3</sub>                     | 40        |

[a] Reaction conditions: **1a** (0.2mmol), [Ce] (10 mol%), CH<sub>3</sub>CN (1.0 mL) at room temperature (25°C), Blue LED (405-410 nm, 4 W) for 40 h, isolated yield.

**Table 2. screening of the catalyst loading<sup>[a]</sup>**

| 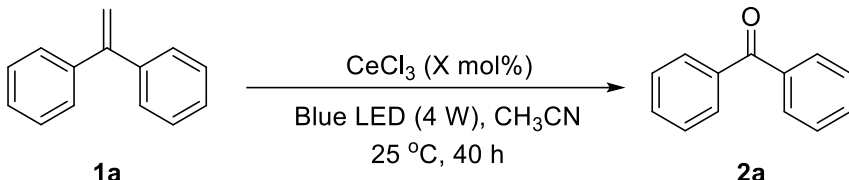 |                            |           |
|--------------------------------------------------------------------------------------|----------------------------|-----------|
| Entry                                                                                | CeCl <sub>3</sub> (X mol%) | Yield (%) |
| 1                                                                                    | 1                          | 40        |
| 2                                                                                    | 5                          | 45        |
| 3                                                                                    | 10                         | 50        |
| 4                                                                                    | 20                         | 53        |

[a] Reaction conditions: **1a** (0.2mmol), CeCl<sub>3</sub> (X mol%), CH<sub>3</sub>CN (1.0 mL) at room temperature (25°C), Blue LED (405-410 nm, 4 W) for 40 h, isolated yield.

**Table 3. Screening of the additives<sup>[a]</sup>**

| <div><div>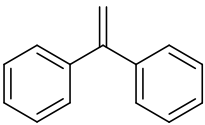<br/><b>1a</b></div><div><div><math>\xrightarrow[\text{Blue LED (4 W), CH}_3\text{CN}]{\text{CeCl}_3 \text{ (10 mol\%), ROH (20 mol\%)}}</math><br/>25 °C, 40 h</div></div><div><div>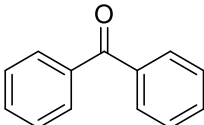<br/><b>2a</b></div></div></div> |                                     |           |
|-----------------------------------------------------------------------------------------------------------------------------------------------------------------------------------------------------------------------------------------------------------------------------------------------------------------------------------------------------------------------------------------------------|-------------------------------------|-----------|
| Entry                                                                                                                                                                                                                                                                                                                                                                                               | ROH                                 | Yield (%) |
| 1                                                                                                                                                                                                                                                                                                                                                                                                   | -                                   | 52        |
| 2                                                                                                                                                                                                                                                                                                                                                                                                   | IPA                                 | 71        |
| 3                                                                                                                                                                                                                                                                                                                                                                                                   | EtOH                                | 68        |
| 4                                                                                                                                                                                                                                                                                                                                                                                                   | CH <sub>3</sub> OH                  | 60        |
| 5                                                                                                                                                                                                                                                                                                                                                                                                   | CCl <sub>3</sub> CH <sub>2</sub> OH | 92        |
| 6                                                                                                                                                                                                                                                                                                                                                                                                   | TFE                                 | 65        |
| 7                                                                                                                                                                                                                                                                                                                                                                                                   | HFIP                                | 60        |
| 8                                                                                                                                                                                                                                                                                                                                                                                                   | TAA                                 | 62        |
| 9                                                                                                                                                                                                                                                                                                                                                                                                   | EG                                  | 63        |

[a] Reaction conditions: **1a** (0.2mmol), CeCl<sub>3</sub> (10 mol%), ROH (20 mol%), CH<sub>3</sub>CN (1.0 mL) at room temperature (25°C), Blue LED (405-410 nm, 4 W) for 40 h, isolated yield.

**Table 4. Screening of the amount of alcohol<sup>[a]</sup>**

| <div><div>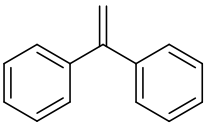<br/><b>1a</b></div><div><div><math>\xrightarrow[\text{Blue LED (4 W), CH}_3\text{CN}]{\text{CeCl}_3 \text{ (10 mol\%)}</math><br/>CCl<sub>3</sub>CH<sub>2</sub>OH (X mol%)<br/>25 °C, 40 h</div></div><div><div>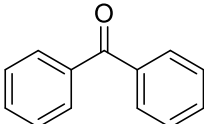<br/><b>2a</b></div></div></div> |                                              |           |
|-------------------------------------------------------------------------------------------------------------------------------------------------------------------------------------------------------------------------------------------------------------------------------------------------------------------------------------------------------------------------------------------------------------------------------------|----------------------------------------------|-----------|
| Entry                                                                                                                                                                                                                                                                                                                                                                                                                               | CCl <sub>3</sub> CH <sub>2</sub> OH (X mol%) | Yield (%) |
| 1                                                                                                                                                                                                                                                                                                                                                                                                                                   | 10                                           | 72        |
| 2                                                                                                                                                                                                                                                                                                                                                                                                                                   | 20                                           | 92        |
| 3                                                                                                                                                                                                                                                                                                                                                                                                                                   | 40                                           | 81        |
| 4                                                                                                                                                                                                                                                                                                                                                                                                                                   | 60                                           | 82        |
| 5                                                                                                                                                                                                                                                                                                                                                                                                                                   | 100                                          | 84        |

[a] Reaction conditions: **1a** (0.2mmol), CeCl<sub>3</sub> (10 mol%), CCl<sub>3</sub>CH<sub>2</sub>OH (X mol%), CH<sub>3</sub>CN (1.0 mL) at room temperature (25°C), Blue LED (405-410 nm, 4 W) for 40 h, isolated yield.

**Table 5. Screening of solvents<sup>[a]</sup>**

| <div><div><br/><b>1a</b></div><div><div>CeCl<sub>3</sub> (10 mol%)<br/>CCl<sub>3</sub>CH<sub>2</sub>OH (20 mol%)<br/>Blue LED (4 W), Solvent<br/>25 °C, 40 h</div><div><br/><b>2a</b></div></div></div> |                                     |           |
|-----------------------------------------------------------------------------------------------------------------------------------------------------------------------------------------------------------------------------------------------------------------------------------------------------------------------------------------------------------------------------|-------------------------------------|-----------|
| Entry                                                                                                                                                                                                                                                                                                                                                                       | Solvent                             | Yield (%) |
| 1                                                                                                                                                                                                                                                                                                                                                                           | DMSO                                | 60        |
| 2                                                                                                                                                                                                                                                                                                                                                                           | DMF                                 | 65        |
| 3                                                                                                                                                                                                                                                                                                                                                                           | DMAC                                | 63        |
| 4                                                                                                                                                                                                                                                                                                                                                                           | THF                                 | 64        |
| 5                                                                                                                                                                                                                                                                                                                                                                           | MeCN                                | 92        |
| 6                                                                                                                                                                                                                                                                                                                                                                           | DCM                                 | 73        |
| 7                                                                                                                                                                                                                                                                                                                                                                           | DCE                                 | 60        |
| 8                                                                                                                                                                                                                                                                                                                                                                           | Acetone                             | 62        |
| 9                                                                                                                                                                                                                                                                                                                                                                           | CCl <sub>3</sub> CH <sub>2</sub> OH | 55        |
| 10                                                                                                                                                                                                                                                                                                                                                                          | Chlorobenzene                       | 62        |

[a] Reaction conditions: **1a** (0.2mmol), CeCl<sub>3</sub> (10 mol%), CCl<sub>3</sub>CH<sub>2</sub>OH (20 mol%), solvent (1.0 mL) at room temperature (25°C), Blue LED (405-410 nm, 4 W) for 40 h, isolated yield.

**Table 6. Screening of reaction time<sup>[a]</sup>**

| <div><div>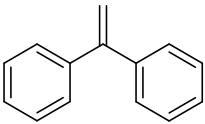<br/><b>1a</b></div><div><div>CeCl<sub>3</sub> (10 mol%)<br/>CCl<sub>3</sub>CH<sub>2</sub>OH (20 mol%)<br/>Blue LED (4 W), CH<sub>3</sub>CN, 25 °C</div><div>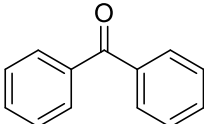<br/><b>2a</b></div></div></div> |          |           |
|---------------------------------------------------------------------------------------------------------------------------------------------------------------------------------------------------------------------------------------------------------------------------------------------------------------------------------------------------------------------------------|----------|-----------|
| Entry                                                                                                                                                                                                                                                                                                                                                                           | Time (h) | Yield (%) |
| 1                                                                                                                                                                                                                                                                                                                                                                               | 16       | 60        |
| 2                                                                                                                                                                                                                                                                                                                                                                               | 24       | 65        |
| 3                                                                                                                                                                                                                                                                                                                                                                               | 36       | 74        |
| 4                                                                                                                                                                                                                                                                                                                                                                               | 40       | 92        |

[a] Reaction conditions: **1a** (0.2mmol), CeCl<sub>3</sub> (10 mol%), CCl<sub>3</sub>CH<sub>2</sub>OH (20 mol%), CH<sub>3</sub>CN (1.0 mL) at room temperature (25°C), Blue LED (405-410 nm, 4 W), isolated yield.

### 3. General procedure for Ce-catalyzed photooxidative cleavage of olefins

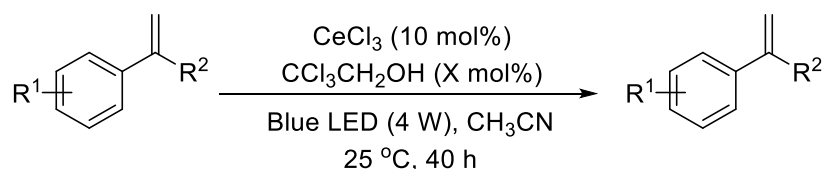

A mixture of olefin (0.2 mmol), CeCl<sub>3</sub> (10 mol%, 4.9 mg), CCl<sub>3</sub>CH<sub>2</sub>OH (20 mol%, 5.9 mg) and CH<sub>3</sub>CN (1.0 mL) was added into a quartz tube which was placed in a photochemical reactor (Blue LED, 405-410 nm, 4 W). The reaction mixture was stirred at 25 °C under air for 40 h. After concentrated under reduced pressure, the residue was purified by flash column chromatography on silica gel and eluted with EtOAc/petroleum ether (1/100~10/1) to afford the desired product.

### 4. Experimental characterization data for products

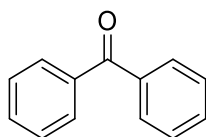

**Benzophenone (2a).** The product **2a** was obtained via the *general procedure* using ethene-1,1-diyl dibenzene **1a** (36.0 mg, 0.2 mmol) and isolated by flash column chromatography as a white solid (33.5 mg, 92%). Known compound, mp 48-49 °C, spectroscopic data matched those previously reported.<sup>[1]</sup>

$^1\text{H}$  NMR (400 MHz,  $\text{CDCl}_3$ )  $\delta$  7.85 (d,  $J = 7.8$  Hz, 4H), 7.63 (t,  $J = 7.4$  Hz, 2H), 7.52 (t,  $J = 7.6$  Hz, 4H);  $^{13}\text{C}$  NMR (101 MHz,  $\text{CDCl}_3$ )  $\delta$  196.86, 137.65 (2C), 132.37 (2C), 130.02 (4C), 128.26 (4C).

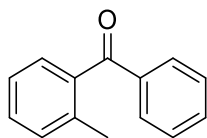

**2-Methylbenzophenone (2b).** The product **2b** was obtained in 2 W Blue LED via the *modified procedure* using 1-methyl-2-(1-phenylvinyl) benzene **1b** (38.8 mg, 0.2 mmol) and isolated by flash column chromatography as colorless liquid (25.1 mg, 64%).

Known compound, spectroscopic data matched those previously reported.<sup>[2]</sup>

$^1\text{H}$  NMR (400 MHz,  $\text{CDCl}_3$ )  $\delta$  7.83 (d,  $J = 7.5$  Hz, 2H), 7.54 (t,  $J = 7.3$  Hz, 1H), 7.46 - 7.29 (m, 4H), 7.29 - 7.20 (m, 2H), 2.36 (s, 3H);  $^{13}\text{C}$  NMR (101 MHz,  $\text{CDCl}_3$ )  $\delta$  198.25, 138.70, 137.82, 136.67, 133.10, 131.04, 130.25, 130.05 (2C), 128.49 (2C), 125.24, 19.94.

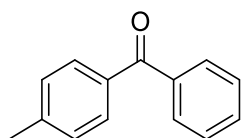

**4-Methylbenzophenone (2c).** The product **2c** was obtained via the *general procedure* using 1-methyl-4-(1-phenylvinyl) benzene **1c** (38.8 mg, 0.2 mmol) and isolated by flash column chromatography as a white solid (34.8 mg, 89%).

Known compound, mp 59-61 °C, spectroscopic data matched those previously reported.<sup>[3]</sup>

<sup>1</sup>H NMR (400 MHz, CDCl<sub>3</sub>) δ 7.78 (d, *J* = 1.3 Hz, 2H), 7.73 (d, *J* = 8.1 Hz, 2H), 7.55 (t, *J* = 7.4 Hz, 1H), 7.45 (t, *J* = 7.6 Hz, 2H), 7.26 (d, *J* = 8.0 Hz, 2H), 2.41 (s, 3H); <sup>13</sup>C NMR (101 MHz, CDCl<sub>3</sub>) δ 196.16, 143.13, 137.98, 134.92, 132.11, 130.23(2C), 129.85(2C), 128.97(2C), 128.20(2C), 21.56.

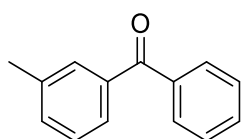

**3-Methylbenzophenone (2d).** The product **2d** was obtained via the *general procedure* using 1-methyl-3-(1-phenylvinyl) benzene **1d** (38.8 mg, 0.2 mmol) and isolated by flash column chromatography as yellow oil (32.9 mg, 84%).

Known compound, spectroscopic data matched those previously reported.<sup>[4]</sup>

<sup>1</sup>H NMR (400 MHz, CDCl<sub>3</sub>) δ 7.81 (d, *J* = 7.7 Hz, 2H), 7.66 (s, 1H), 7.57 (dd, *J* = 15.5, 7.4 Hz, 2H), 7.46 (t, *J* = 7.6 Hz, 2H), 7.36 (dt, *J* = 14.8, 7.5 Hz, 2H), 2.40 (s, 3H); <sup>13</sup>C NMR (101 MHz, CDCl<sub>3</sub>) δ 196.64, 138.09, 137.79, 137.68, 133.16, 132.30, 130.40 (2C), 129.98 (2C), 128.24, 128.11, 127.31, 21.29.

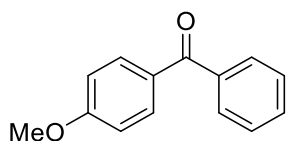

**4-Methoxybenzophenone (2e).** The product **2e** was obtained in 2 W Blue LED via the *general procedure* using 1-methoxy-4-(1-phenylvinyl) benzene **1e** (42 mg, 0.2 mmol) and isolated by flash column chromatography as a yellow solid (35.2 mg, 83%).

Known compound, mp 60-62 °C, spectroscopic data matched those previously reported.<sup>[1]</sup>

<sup>1</sup>H NMR (400 MHz, CDCl<sub>3</sub>) δ 7.82 (s, 2H), 7.77 (d, *J* = 7.9 Hz, 2H), 7.56 (t, *J* = 7.1 Hz, 1H), 7.47 (t, *J* = 7.6 Hz, 2H), 6.96 (d, *J* = 8.5 Hz, 2H), 3.86 (s, 3H); <sup>13</sup>C NMR (101 MHz, CDCl<sub>3</sub>) δ 195.35, 163.24, 138.31, 132.47 (2C), 131.84, 130.13, 129.65 (2C), 128.17 (2C), 113.58 (2C), 55.42.

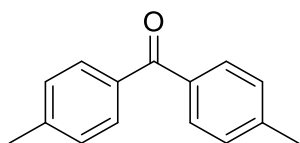

**4,4'-Dimethylbenzophenone (2f).** The product **2f** was obtained via the *general procedure* using 4,4'-(ethene-1,1-diyl) bis(methylbenzene) **1f** (41.6 mg, 0.2 mmol) and isolated by flash column chromatography as a brown solid (36.1 mg, 86%).

Known compound, mp 95-97 °C, spectroscopic data matched those previously reported.<sup>[5]</sup>

<sup>1</sup>H NMR (400 MHz, CDCl<sub>3</sub>) δ 7.75 (d, *J* = 8.1 Hz, 2H), 7.31 (d, *J* = 7.9 Hz, 2H), 2.48 (s, 3H); <sup>13</sup>C NMR (101 MHz, CDCl<sub>3</sub>) δ 196.16, 142.87, 135.27, 130.15, 128.89, 21.58.

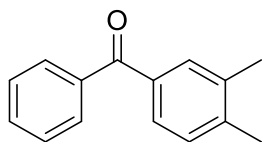

**3,4-Dimethylbenzophenone (2g).** The product **2g** was obtained via the *general procedure* using 1,2-dimethyl-4-(1-phenylvinyl) benzene **1g** (41.6 mg, 0.2 mmol) and isolated by flash column chromatography as a white solid (33.6 mg, 80%).

Known compound, mp 46-48 °C, spectroscopic data matched those previously reported.<sup>[6]</sup>

<sup>1</sup>H NMR (400 MHz, CDCl<sub>3</sub>) δ 7.85 - 7.81 (m, 2H), 7.67 (s, 1H), 7.60 (dd, *J* = 12.4, 5.2, 4.1 Hz, 2H), 7.51 (t, *J* = 7.5 Hz, 2H), 7.27 (d, *J* = 7.8 Hz, 1H), 2.39 (s, 3H), 2.37 (s, 3H); <sup>13</sup>C NMR (101 MHz, CDCl<sub>3</sub>) δ 196.61, 141.91, 138.13, 136.71, 135.36, 132.05, 131.17, 129.90 (2C), 129.45, 128.17 (2C), 128.01, 19.95, 19.71.

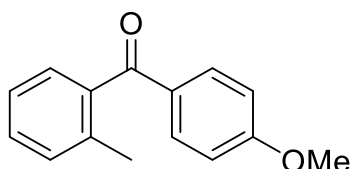

**(4-Methoxyphenyl) (2-methylphenyl) methanone (2h).** The product **2e** was obtained in 10 W Blue LED via the *modified procedure* using 1-(1-(4-methoxyphenyl) vinyl)-2-methylbenzene **1h** (44.8 mg, 0.2 mmol) and isolated by flash column chromatography as yellow oil (33.5 mg, 74%).

Known compound, spectroscopic data matched those previously reported.<sup>[7]</sup>

$^1\text{H}$  NMR (400 MHz,  $\text{CDCl}_3$ )  $\delta$  7.81 (dd,  $J = 6.7, 4.8$  Hz, 2H), 7.37 (td,  $J = 7.5, 1.5$  Hz, 1H), 7.31 (s, 1H), 7.26 (d,  $J = 3.4$  Hz, 1H), 7.24 (t,  $J = 7.5$  Hz, 1H), 6.92 (t,  $J = 5.8$  Hz, 2H), 3.84 (s, 3H), 2.33 (s, 3H);  $^{13}\text{C}$  NMR (101 MHz,  $\text{CDCl}_3$ )  $\delta$  197.11, 163.75, 139.28, 136.08, 132.41 (2C), 130.82, 130.53, 129.77, 127.89, 125.18, 113.75 (2C), 55.34, 19.71.

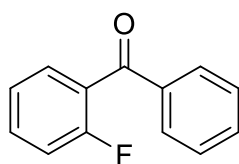

**2-Fluorobenzophenone (2i).** The product **2i** was obtained via the *general procedure* using 1-fluoro-2-(1-phenylvinyl) benzene **1i** (39.6 mg, 0.2 mmol) and isolated by flash column chromatography as a colorless oil (29.6 mg, 74%).

Known compound, spectroscopic data matched those previously reported.<sup>[8]</sup>

$^1\text{H}$  NMR (400 MHz,  $\text{CDCl}_3$ )  $\delta$  7.89 - 7.84 (m, 2H), 7.61 - 7.43 (m, 5H), 7.25 (td,  $J = 7.6, 0.8$  Hz, 1H), 7.18 - 7.11 (m, 1H);  $^{13}\text{C}$  NMR (101 MHz,  $\text{CDCl}_3$ )  $\delta$  193.29, 161.32 (d,  $J = 254$  Hz), 137.41, 133.40, 133.10 (d,  $J = 8$  Hz), 130.68 (d,  $J = 2$  Hz), 129.76 (2C), 128.47 (2C), 127.13 (d,  $J = 14$  Hz), 124.31 (d,  $J = 4$  Hz), 116.34 (d,  $J = 22$  Hz).

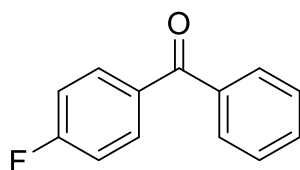

**4-Fluoroacetophenone (2j).** The product **2j** was obtained via the *general procedure* using 1-fluoro-4-(1-phenylvinyl) benzene **1j** (39.6 mg, 0.2 mmol) and isolated by flash column chromatography as yellow oil (34.4 mg, 86%).

Known compound, spectroscopic data matched those previously reported.<sup>[9]</sup>

<sup>1</sup>H NMR (400 MHz, CDCl<sub>3</sub>) δ 7.88 - 7.81 (m, 2H), 7.80 - 7.74 (m, 2H), 7.58 (dd, *J* = 10.6, 4.3 Hz, 1H), 7.48 (t, *J* = 7.6 Hz, 2H), 7.20 - 7.08 (m, 2H); <sup>13</sup>C NMR (101 MHz, CDCl<sub>3</sub>) δ 194.99, 166.59 (d, *J* = 255 Hz), 137.51, 133.84 (d, *J* = 3 Hz), 132.64 (d, *J* = 2 Hz, 2C), 132.39, 129.80 (2C), 128.32 (2C), 115.49 (d, *J* = 22 Hz, 2C).

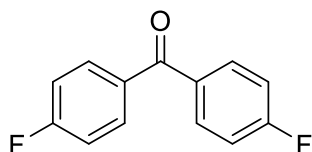

**Bis (4-fluorophenyl)-methanone (2k).** The product **2k** was obtained via the *general procedure* using 4,4'-(ethene-1,1-diyl) bis(fluorobenzene) **1k** (43.2 mg, 0.2 mmol) and isolated by flash column chromatography as a white solid (30.5 mg, 70%).

Known compound, mp 107-109 °C, spectroscopic data matched those previously reported.<sup>[4]</sup>

<sup>1</sup>H NMR (400 MHz, CDCl<sub>3</sub>) δ 7.89 - 7.82 (m, 1H), 7.21 (dd, *J* = 8.9, 4.3, 2.2 Hz, 1H); <sup>13</sup>C NMR (101 MHz, CDCl<sub>3</sub>) δ 193.70, 166.65 (d, *J* = 256 Hz,

2C), 133.74 (d,  $J = 3$  Hz, 2C), 132.49 (d,  $J = 9$  Hz, 4C), 115.62 (d,  $J = 21$  Hz, 4C).

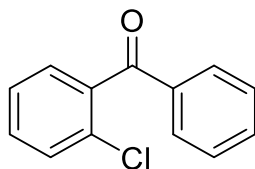

**2-Chlorobenzophenone (2l).** The product **2l** was obtained in 10 W Blue LED via the *modified procedure* using 1-chloro-4-(1-phenylvinyl) benzene **1l** (42.8 mg, 0.2 mmol) and isolated by flash column chromatography as a white solid (33.8 mg, 78%).

Known compound, mp 51-54 °C, spectroscopic data matched those previously reported.<sup>[10]</sup>

<sup>1</sup>H NMR (400 MHz, CDCl<sub>3</sub>)  $\delta$  7.85 (d,  $J = 7.9$  Hz, 2H), 7.62 (t,  $J = 7.4$  Hz, 1H), 7.46 (dd,  $J = 11.2, 8.9, 5.2$  Hz, 4H), 7.43 - 7.35 (m, 2H); <sup>13</sup>C NMR (101 MHz, CDCl<sub>3</sub>)  $\delta$  195.16, 138.63, 136.51, 133.69, 131.26, 131.14, 130.03 (2C), 129.10, 128.62 (2C), 126.70.

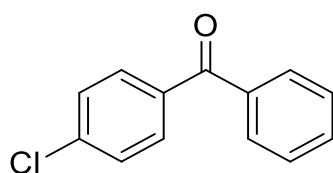

**4-Chlorobenzophenone (2m).** The product **2m** was obtained via the *general procedure* using 1-chloro-4-(1-phenylvinyl) benzene **1m** (42.8 mg, 0.2 mmol) and isolated by flash column chromatography as a yellow solid (35.5 mg, 82%).

Known compound, mp 75-77 °C, spectroscopic data matched those previously reported.<sup>[1]</sup>

<sup>1</sup>H NMR (400 MHz, CDCl<sub>3</sub>) δ 7.70 (dd, *J* = 15.8, 8.2 Hz, 4H), 7.52 (t, *J* = 7.4 Hz, 1H), 7.45 - 7.34 (m, 4H); <sup>13</sup>C NMR (101 MHz, CDCl<sub>3</sub>) δ 194.91, 138.67, 137.18, 135.85, 132.53, 131.37 (2C), 129.83 (2C), 128.54 (2C), 128.35 (2C).

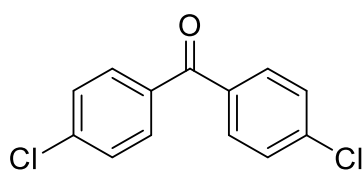

**4,4'-Dichlorobenzophenone (2n).** The product **2n** was obtained via the *general procedure* using 4,4'-(ethene-1,1-diyl) bis(chlorobenzene) **1n** (49.6 mg, 0.2 mmol) and isolated by flash column chromatography as a white solid (44.2 mg, 88%).

Known compound, mp 145-147 °C, spectroscopic data matched those previously reported.<sup>[4]</sup>

<sup>1</sup>H NMR (400 MHz, CDCl<sub>3</sub>) δ 7.75 (d, *J* = 8.5 Hz, 1H), 7.49 (d, *J* = 8.4 Hz, 1H); <sup>13</sup>C NMR (101 MHz, CDCl<sub>3</sub>) δ 194.07, 139.11 (2C), 135.53 (2C), 131.26 (4C), 128.73 (4C).

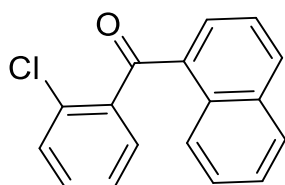

**(2-chlorophenyl) (naphthalen-1-yl) methanone (2o).** The product **2o** was obtained in 10 W Blue LED via the *modified procedure* using 1-(1-(2-

chlorophenyl) vinyl) naphthalene **1o** (52.8 mg, 0.2 mmol) and isolated by flash column chromatography as a white solid (21.3 mg, 40%).

Known compound, mp 84-86 °C, spectroscopic data matched those previously reported.<sup>[11]</sup>

<sup>1</sup>H NMR (400 MHz, CDCl<sub>3</sub>) δ 8.94 (d, *J* = 8.5 Hz, 1H), 8.08 (d, *J* = 8.2 Hz, 1H), 7.97 (d, *J* = 8.1 Hz, 1H), 7.71 (dd, *J* = 8.5, 6.9, 1.3 Hz, 1H), 7.62 (dd, *J* = 12.0, 4.0 Hz, 2H), 7.58 -7.53 (m, 1H), 7.51 - 7.48 (m, 2H), 7.46 (dd, *J* = 7.9, 3.8 Hz, 1H), 7.41 (dd, *J* = 7.4, 6.5, 2.3 Hz, 1H); <sup>13</sup>C NMR (101 MHz, CDCl<sub>3</sub>) δ 197.03, 139.99, 134.40, 134.02, 133.76, 132.09, 131.79, 131.52, 130.98, 130.32, 130.14, 128.53, 128.39, 126.71, 126.67, 126.00, 124.30.

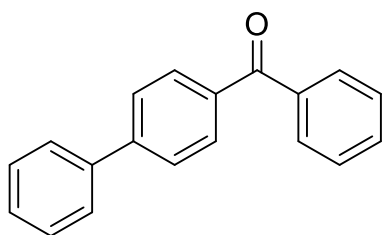

**4-Benzoylbiphenyl (2p).** The product **2p** was obtained via the *general procedure* using 4-(1-phenylvinyl)-1,1'-biphenyl **1p** (51.2 mg, 0.2 mmol) and isolated by flash column chromatography as a white solid (45.5mg, 88%).

Known compound, mp 100-103 °C, spectroscopic data matched those previously reported.<sup>[12]</sup>

<sup>1</sup>H NMR (400 MHz, CDCl<sub>3</sub>) δ 7.94 (dd, *J* = 19.8, 7.9 Hz, 4H), 7.74 (dd, *J* = 18.9, 7.7 Hz, 4H), 7.65 (t, *J* = 7.4 Hz, 1H), 7.55 (dd, *J* = 14.8, 7.6 Hz, 4H), 7.46 (t, *J* = 7.3 Hz, 1H); <sup>13</sup>C NMR (101 MHz, CDCl<sub>3</sub>) δ 196.19, 145.22,

139.98, 137.87, 136.34, 132.40, 130.77 (2C), 130.03 (2C), 129.05 (2C), 128.38 (2C), 128.27, 127.34 (2C), 127.00 (2C).

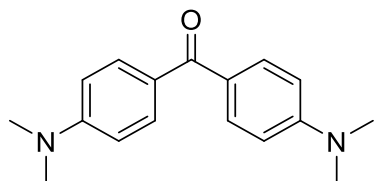

**4,4'-Bis (dimethylamino) benzophenone (2q).** The product **2q** was obtained via the *general procedure* using 4,4'-(ethene-1,1-diyl) bis (N, N-dimethylaniline) **1q** (53.2 mg, 0.2 mmol) and isolated by flash column chromatography as a green solid (32.8 mg, 65%).

Known compound, mp 171-174 °C, spectroscopic data matched those previously reported.<sup>[13]</sup>

<sup>1</sup>H NMR (400 MHz, CDCl<sub>3</sub>) δ 7.82 (s, 4H), 6.75 (s, 4H), 3.11 (s, 12H); <sup>13</sup>C NMR (101 MHz, CDCl<sub>3</sub>) δ 193.97, 152.72 (2C), 132.16 (4C), 126.42 (2C), 110.59 (4C), 40.08 (4C).

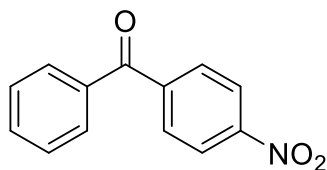

**4-Nitrobenzophenone (2r).** The product **2r** was obtained via the *general procedure* using 1-nitro-4-(1-phenylvinyl) benzene **1r** (45 mg, 0.2 mmol) and isolated by flash column chromatography as a yellow solid (30.9 mg, 68%).

Known compound, mp 135-138 °C, spectroscopic data matched those previously reported.<sup>[1]</sup>

$^1\text{H}$  NMR (400 MHz,  $\text{CDCl}_3$ )  $\delta$  8.37 (d,  $J = 8.3$  Hz, 2H), 7.97 (d,  $J = 8.3$  Hz, 2H), 7.84 (d,  $J = 7.5$  Hz, 2H), 7.69 (t,  $J = 7.2$  Hz, 1H), 7.56 (t,  $J = 7.4$  Hz, 2H);  $^{13}\text{C}$  NMR (101 MHz,  $\text{CDCl}_3$ )  $\delta$  194.71, 149.85, 142.90, 136.32, 133.42, 130.64 (2C), 130.06 (2C), 128.66 (2C), 123.50 (2C).

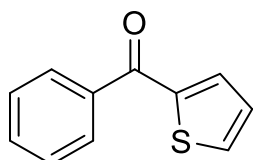

**2-benzoylthiophene (2s).** The product **2s** was obtained via the *general procedure* using 2-(1-phenylvinyl) thiophene **1s** (37.2mg, 0.2 mmol) and isolated by flash column chromatography as yellow oil (28.6 mg, 76%).

Known compound, spectroscopic data matched those previously reported.<sup>[1]</sup>

$^1\text{H}$  NMR (400 MHz,  $\text{CDCl}_3$ )  $\delta$  7.94 - 7.88 (m, 2H), 7.77 (d,  $J = 4.7$  Hz, 1H), 7.70 (d,  $J = 3.4$  Hz, 1H), 7.64 (dd,  $J = 8.4, 6.4$  Hz, 1H), 7.54 (t,  $J = 7.6$  Hz, 2H), 7.21 (dd,  $J = 7.7, 3.5$  Hz, 1H);  $^{13}\text{C}$  NMR (101 MHz,  $\text{CDCl}_3$ )  $\delta$  188.17, 143.65, 138.20, 134.77, 134.14, 132.23, 129.14 (2C), 128.40 (2C), 127.93.

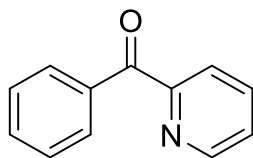

**2-benzoyl pyridine (2t).** The product **2t** was obtained in 10 W Blue LED via the *modified procedure* using 2-(1-phenylvinyl) pyridine **1t** (36.2mg, 0.2 mmol) and isolated by flash column chromatography as a white solid (25.6mg, 70%).

Known compound, mp 40-44 °C, spectroscopic data matched those previously reported.<sup>[10]</sup>

<sup>1</sup>H NMR (400 MHz, CDCl<sub>3</sub>) δ 8.75 (s, 1H), 8.11 (d, *J* = 7.4 Hz, 2H), 8.09 - 8.04 (m, 1H), 7.92 (dd, *J* = 7.5, 4.6, 1.7 Hz, 1H), 7.65 - 7.59 (m, 1H), 7.54 - 7.48 (m, 3H); <sup>13</sup>C NMR (101 MHz, CDCl<sub>3</sub>) δ 193.79, 155.17, 148.54, 137.01, 136.33, 132.87, 130.98 (2C), 128.14 (2C), 126.11, 124.56.

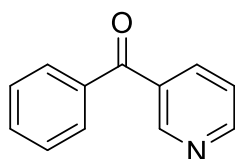

**3-benzoyl pyridine (2u).** The product **2u** was obtained via the *general procedure* using 3-(1-phenylvinyl) pyridine **1u** (36.2mg, 0.2 mmol) and isolated by flash column chromatography as yellow oil (27 mg, 72%).

Known compound, spectroscopic data matched those previously reported.<sup>[14]</sup>

<sup>1</sup>H NMR (400 MHz, CDCl<sub>3</sub>) δ 8.98 (s, 1H), 8.82 - 8.75 (m, 1H), 8.10 (tt, *J* = 5.3, 3.5, 1.7 Hz, 1H), 7.83 - 7.77 (m, 2H), 7.65 - 7.58 (m, 1H), 7.54 - 7.47 (m, 2H), 7.44 (dt, *J* = 8.0, 4.8 Hz, 1H); <sup>13</sup>C NMR (101 MHz, CDCl<sub>3</sub>) δ 194.72, 152.75, 150.85, 137.06, 136.70, 133.12, 133.07, 129.93 (2C), 128.55 (2C), 123.26.

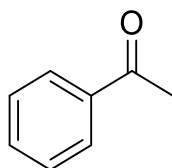

**Acetophenone (4a).** The product **4a** was obtained via the *general procedure* using prop-1-en-2-ylbenzene **3a** (23.6 mg, 0.2 mmol) and isolated by flash column chromatography as colorless oil (17.3 mg, 72%). Known compound, spectroscopic data matched those previously reported.<sup>[15]</sup>

<sup>1</sup>H NMR (400 MHz, CDCl<sub>3</sub>) δ 7.99 (s, 2H), 7.60 (t, *J* = 7.4 Hz, 1H), 7.50 (t, *J* = 7.7 Hz, 2H), 2.64 (s, 3H); <sup>13</sup>C NMR (101 MHz, CDCl<sub>3</sub>) δ 198.03, 137.20, 133.03, 128.53 (2C), 128.26 (2C), 26.50.

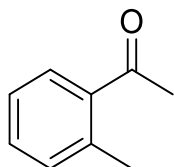

**2'-Methylacetophenone (4b).** The product **4b** was obtained via the *general procedure* using 1-methyl-2-(prop-1-en-2-yl) benzene **3b** (26.4 mg, 0.2 mmol) and isolated by flash column chromatography as yellow oil (18.2 mg, 68%).

Known compound, spectroscopic data matched those previously reported.<sup>[16]</sup>

<sup>1</sup>H NMR (400 MHz, CDCl<sub>3</sub>) δ 7.68 (d, *J* = 7.6 Hz, 1H), 7.36 (t, *J* = 7.5 Hz, 1H), 7.24 (dd, *J* = 12.7, 7.5 Hz, 2H), 2.56 (s, 3H), 2.54 (s, 3H); <sup>13</sup>C NMR (101 MHz, CDCl<sub>3</sub>) δ 201.45, 138.25, 137.68, 131.96, 131.41, 129.27, 125.65, 29.37, 21.43.

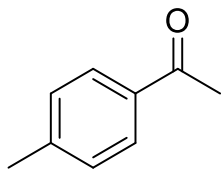

**4'-Methylacetophenone (4c).** The product **4c** was obtained via the *general procedure* using 1-methyl-4-(prop-1-en-2-yl) benzene **3c** (26.4 mg, 0.2 mmol) and isolated by flash column chromatography as yellow oil (19.6 mg, 73 %).

Known compound, spectroscopic data matched those previously reported.<sup>[17]</sup>

<sup>1</sup>H NMR (400 MHz, CDCl<sub>3</sub>) δ 7.86 (d, *J* = 8.2 Hz, 2H), 7.26 (d, *J* = 8.4 Hz, 2H), 2.57 (s, 3H), 2.41 (s, 3H); <sup>13</sup>C NMR (101 MHz, CDCl<sub>3</sub>) δ 197.60, 143.74, 134.77, 129.18 (2C), 128.37 (2C), 26.36, 21.50.

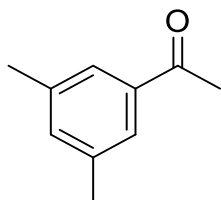

**3,5-DiMethylacetoph (4d).** The product **4d** was obtained via the *general procedure* using 1,3-dimethyl-5-(prop-1-en-2-yl) benzene **3d** (29.2 mg, 0.2 mmol) and isolated by flash column chromatography as yellow oil (20.8 mg, 70%).

Known compound, spectroscopic data matched those previously reported.<sup>[18]</sup>

$^1\text{H}$  NMR (400 MHz,  $\text{CDCl}_3$ )  $\delta$  7.59 (s, 2H), 7.21 (s, 1H), 2.59 (s, 3H), 2.39 (s, 6H);  $^{13}\text{C}$  NMR (101 MHz,  $\text{CDCl}_3$ )  $\delta$  198.40, 138.12, 137.30, 134.63 (2C), 126.07 (2C), 26.57, 21.12 (2C).

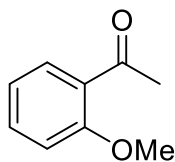

**2-Methoxyacetophenone (4e).** The product **4e** was obtained via the *general procedure* using 1-methoxy-2-(prop-1-en-2-yl) benzene **3e** (29.6 mg, 0.2 mmol) and isolated by flash column chromatography as yellow oil (15.3 mg, 51 %).

Known compound, spectroscopic data matched those previously reported.<sup>[16]</sup>

$^1\text{H}$  NMR (400 MHz,  $\text{CDCl}_3$ )  $\delta$  7.75 (dd,  $J = 7.7, 1.2$  Hz, 1H), 7.50 - 7.44 (m, 1H), 7.03 - 6.96 (m, 2H), 3.92 (s, 3H), 2.63 (s, 3H);  $^{13}\text{C}$  NMR (101 MHz,  $\text{CDCl}_3$ )  $\delta$  199.67, 158.90, 133.62, 130.23, 120.47, 111.61, 55.41, 31.72.

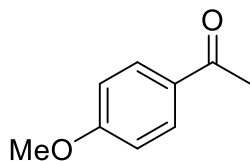

**4-Methoxyacetophenone (4f).** The product **4f** was obtained via the *general procedure* using 1-methoxy-4-(prop-1-en-2-yl) benzene **3f** (29.6 mg, 0.2 mmol) and isolated by flash column chromatography as a yellow solid (19.2 mg, 64%).

Known compound, mp 36-38 °C, spectroscopic data matched those previously reported.<sup>[17]</sup>

<sup>1</sup>H NMR (400 MHz, CDCl<sub>3</sub>) δ 7.96 (d, *J* = 8.8 Hz, 2H), 6.96 (d, *J* = 8.8 Hz, 2H), 3.90 (s, 3H), 2.58 (s, 3H); <sup>13</sup>C NMR (101 MHz, CDCl<sub>3</sub>) δ 196.64, 163.48, 130.53, 130.37 (2C), 113.66 (2C), 55.40, 26.22.

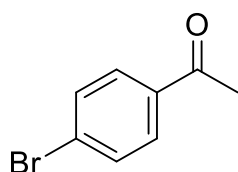

**4'-Bromoacetophenone (4g).** The product **4g** was obtained via the *general procedure* using 1-bromo-4-(prop-1-en-2-yl) benzene **3g** (39.2 mg, 0.2 mmol) and isolated by flash column chromatography as a white solid (19.9 mg, 50%).

Known compound, mp 48-51 °C, spectroscopic data matched those previously reported.<sup>[19]</sup>

<sup>1</sup>H NMR (400 MHz, CDCl<sub>3</sub>) δ 7.84 (d, *J* = 8.4 Hz, 2H), 7.62 (d, *J* = 8.3 Hz, 2H), 2.60 (s, 3H); <sup>13</sup>C NMR (101 MHz, CDCl<sub>3</sub>) δ 196.84, 135.87, 131.85 (2C), 129.79 (2C), 128.23, 26.43.

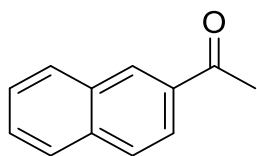

**2-Acetonaphthone (4h).** The product **4h** was obtained via the *general procedure* using 2-(prop-1-en-2-yl) naphthalene **3h** (33.6 mg, 0.2 mmol) and isolated by flash column chromatography as a white solid (24.1 mg, 71%).

Known compound, mp 55-57 °C, spectroscopic data matched those previously reported.<sup>[17]</sup>

<sup>1</sup>H NMR (400 MHz, CDCl<sub>3</sub>) δ 8.50 (s, 1H), 8.08 (d, *J* = 8.6 Hz, 1H), 8.00 (d, *J* = 8.0 Hz, 1H), 7.92 (dd, *J* = 7.9, 5.5 Hz, 2H), 7.62 (dt, *J* = 14.9, 6.9 Hz, 2H), 2.76 (s, 3H); <sup>13</sup>C NMR (101 MHz, CDCl<sub>3</sub>) δ 197.97, 135.60, 134.56, 132.55, 130.12, 129.53, 128.43, 128.39, 127.76, 126.75, 26.60.

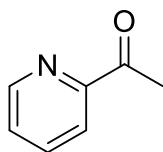

**1-(pyridin-2-yl)ethan-1-one (4i).** The product **4i** was obtained via the *general procedure* using 2-(prop-1-en-2-yl) pyridine **3i** (23.8 mg, 0.2 mmol) and isolated by flash column chromatography as yellow oil (8.3 mg, 34 %).

Known compound, spectroscopic data matched those previously reported.<sup>[20]</sup>

<sup>1</sup>H NMR (600 MHz, Chloroform-d) δ 8.66 – 8.62 (m, 1H), 8.03 – 7.95 (m, 1H), 7.79 (tt, *J* = 7.77, 1.48 Hz, 1H), 7.42 (ddd, *J* = 7.55, 4.78, 1.35 Hz, 1H), 2.68 (s, 3H). <sup>13</sup>C NMR (151 MHz, CDCl<sub>3</sub>) δ 200.08, 153.56, 148.96, 136.81, 127.07, 121.61, 25.74.

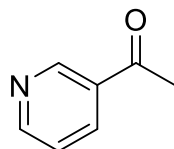

**1-(pyridin-3-yl)ethan-1-one (4j).** The product **4j** was obtained via the *general procedure* using 3-(prop-1-en-2-yl) pyridine **3j** (23.8 mg, 0.2

mmol) and isolated by flash column chromatography as yellow oil (9.9 mg, 41 %).

Known compound, spectroscopic data matched those previously reported.<sup>[20]</sup>

<sup>1</sup>H NMR (600 MHz, Chloroform-d)  $\delta$  9.09 (qd,  $J$  = 2.18, 1.36 Hz, 1H), 8.70 (dq,  $J$  = 4.87, 1.61 Hz, 1H), 8.16 (dq,  $J$  = 7.98, 1.78 Hz, 1H), 7.36 (dddd,  $J$  = 6.79, 4.81, 2.48, 1.26 Hz, 1H), 2.57 (s, 3H). <sup>13</sup>C NMR (151 MHz, CDCl<sub>3</sub>)  $\delta$  196.69, 153.50, 149.89, 135.41, 132.22, 123.59, 26.67.

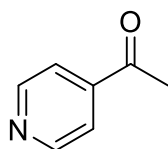

**4-Acetylpyridine (4k).** The product **4k** was obtained via the *general procedure* using 4-(prop-1-en-2-yl) pyridine **3k** (23.8 mg, 0.2 mmol) and isolated by flash column chromatography as yellow oil (6.1 mg, 25 %).

Known compound, spectroscopic data matched those previously reported.<sup>[20]</sup>

<sup>1</sup>H NMR (400 MHz, CDCl<sub>3</sub>)  $\delta$  8.79 (dd,  $J$  = 4.5, 1.6 Hz, 2H), 7.71 (dd,  $J$  = 4.4, 1.6 Hz, 2H), 2.62 (s, 3H); <sup>13</sup>C NMR (101 MHz, CDCl<sub>3</sub>)  $\delta$  197.24, 150.89, 142.75, 121.16, 26.53.

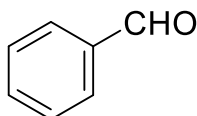

**Benzaldehyde (4l).** The product **4l** was obtained via the *general procedure* using styrene **3l** (20.8 mg, 0.2 mmol) and isolated by flash column chromatography as colorless liquid (13.6 mg, 64%).

Known compound, spectroscopic data matched those previously reported.<sup>[21]</sup>

<sup>1</sup>H NMR (400 MHz, CDCl<sub>3</sub>) δ 9.96 (s, 1H), 7.82 (d, *J* = 7.9 Hz, 2H), 7.56 (t, *J* = 7.4 Hz, 1H), 7.46 (t, *J* = 7.6 Hz, 2H); <sup>13</sup>C NMR (101 MHz, CDCl<sub>3</sub>) δ 192.22, 136.39, 134.35, 129.61 (2C), 128.92 (2C).

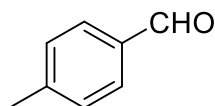

**p-Tolualdehyde (4m).** The product **4m** was obtained via the *general procedure* using 1-methyl-4-vinylbenzene **3m** (23.6 mg, 0.2 mmol) and isolated by flash column chromatography as colorless liquid (14.7 mg, 61%).

Known compound, spectroscopic data matched those previously reported.<sup>[22]</sup>

<sup>1</sup>H NMR (400 MHz, CDCl<sub>3</sub>) δ 9.91 (s, 1H), 7.72 (d, *J* = 8.1 Hz, 2H), 7.27 (d, *J* = 7.9 Hz, 2H), 2.38 (s, 3H); <sup>13</sup>C NMR (101 MHz, CDCl<sub>3</sub>) δ 191.69, 145.37, 134.24, 129.70 (2C), 129.65 (2C), 21.66.

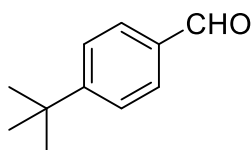

**4-tert-Butylbenzaldehyde (4n).** The product **4n** was obtained via the *general procedure* using 1-(tert-butyl)-4-vinylbenzene **3l** (32 mg, 0.2

mmol) and isolated by flash column chromatography as colorless liquid (23 mg, 71%).

Known compound, spectroscopic data matched those previously reported.<sup>[23]</sup>

<sup>1</sup>H NMR (400 MHz, CDCl<sub>3</sub>) δ 9.99 (s, 1H), 7.83 (d, *J* = 8.2 Hz, 2H), 7.56 (d, *J* = 8.2 Hz, 2H), 1.36 (s, 9H); <sup>13</sup>C NMR (101 MHz, CDCl<sub>3</sub>) δ 191.81, 158.33, 134.14, 129.63 (2C), 125.92 (2C), 35.26, 31.01 (3C).

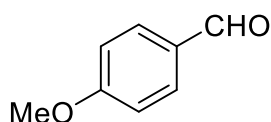

***p*-Anisaldehyde (4o).** The product **4o** was obtained via the *general procedure* using 1-methoxy-4-vinylbenzene **3o** (26.8 mg, 0.2 mmol) and isolated by flash column chromatography as colorless liquid (25.2 mg, 60%).

Known compound, spectroscopic data matched those previously reported.<sup>[24]</sup>

<sup>1</sup>H NMR (400 MHz, CDCl<sub>3</sub>) δ 9.71 (s, 1H), 7.67 - 7.63 (m, 2H), 6.82 (d, *J* = 8.8 Hz, 2H), 3.68 (s, 3H); <sup>13</sup>C NMR (101 MHz, CDCl<sub>3</sub>) δ 190.44, 164.44, 131.69 (2C), 129.83, 114.16 (2C), 55.30.

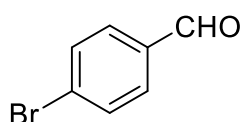

**4-Bromobenzaldehyde (4p).** The product **4p** was obtained via the *general procedure* using 1-bromo-4-vinylbenzene **3p** (36.4 mg, 0.2 mmol) and isolated by flash column chromatography as a yellow solid (20 mg, 54%).

Known compound, mp 65-68 °C, spectroscopic data matched those previously reported.<sup>[24]</sup>

<sup>1</sup>H NMR (400 MHz, CDCl<sub>3</sub>) δ 10.02 (s, 1H), 7.80 - 7.77 (m, 2H), 7.72 (d, *J* = 8.4 Hz, 2H); <sup>13</sup>C NMR (101 MHz, CDCl<sub>3</sub>) δ 190.92, 135.13, 132.42 (2C), 130.92 (2C), 129.73.

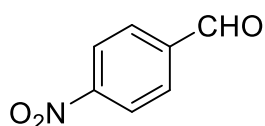

**4-Nitrobenzaldehyde (4q).** The product **4q** was obtained via the *general procedure* using 1-nitro-4-vinylbenzene **3q** (29.8 mg, 0.2 mmol) and isolated by flash column chromatography as a yellow solid (15.1 mg, 50%).

Known compound, mp 104-106 °C, spectroscopic data matched those previously reported.<sup>[24]</sup>

<sup>1</sup>H NMR (400 MHz, CDCl<sub>3</sub>) δ 10.19 (s, 1H), 8.41 (d, *J* = 8.6 Hz, 2H), 8.11 (d, *J* = 8.5 Hz, 2H); <sup>13</sup>C NMR (101 MHz, CDCl<sub>3</sub>) δ 190.22, 151.15, 140.07, 130.45 (2C), 124.28 (2C).

## References

- [1] J. O. Kyu, H. J. Jung, S. Y. Ji and K. L. Chang. *J. Heterocyclic. Chem.* **2003**, 40, 763.
- [2] D. Xing, B. Guan, G. Cai, Z. Fang, L. Yang and Z. Shi. *Org. Lett.* **2006**, 8, 693.

- [3] S. W. Lee, K. Lee, D. Seomoon, S. Kim, H. Kim, E. Shim, M. Lee, S. Lee, M. Kim and P. H. Lee. *J. Org. Chem.* **2004**, *69*, 4852.
- [4] M. L. N. Rao, V. Venkatesh and D. Banerjee. *Tetrahedron* **2007**, *63*, 12917.
- [5] G. A. Babu and P. Ramasamy. *J. Cryst. Growth.* **2008**, *15*, 3561.
- [6] S. K. Murari, S. N. Sriharsha, S. Shashikanth and B. S. Vishwanath. *Bioorg. Med. Chem. Lett.* **2004**, *14*, 2423.
- [7] P. Tang, W. Wang and T. Ritter. *J. Am. Chem. Soc.* **2011**, *133*, 11482.
- [8] M. Li, C. Wang and H. Ge. *Org. Lett.* **2011**, *13*, 2062.
- [9] O. Chuzel, A. Roesch, J.-P. Genet and S. Darses. *J. Org. Chem.* **2008**, *73*, 7800.
- [10] J. Zhang, Z. Wang, Y. Wang, C. Wan, X. Zheng and Z. Wang. *Green Chem.* **2009**, *11*, 1973.
- [11] J. Cason and J. D. Wordie. *J. Org. Chem.* **1950**, *15*, 617.
- [12] I. Sapountzis, W. Lin, C. C. Kofink, C. Despotopoulou and P. Knochel. *Angew. Chem. Int. Ed.* **2005**, *44*, 1654.
- [13] B. Landers, C. Berini, C. Wang and O. Navarro. *J. Org. Chem.* **2011**, *76*, 1390.
- [14] L. J. Gooßen, F. Rudolphi, C. Oppel and N. Rodríguez. *Angew. Chem. Int. Ed.* **2008**, *47*, 3043.
- [15] Y. Yuan, X. Shi and W. Liu. *SynLett.* **2011**, 559.

- [16] J. Ruan, J. A. Iggo, N. G. Berry and J. Xiao. *J. Am. Chem. Soc.* **2010**, *132*, 16689.
- [17] A. Cunningham, V. Mokal-Parekh, C. Wilson and S. Woodward. *Org. Biomol. Chem.* **2004**, *2*, 741.
- [18] D. E. Pearson and J. D. Bruton. *J. Org. Chem.* **1954**, *19*, 957.
- [19] B. Scheiper, M. Bonnekessel, H. Krause and A. Fürstner. *J. Org. Chem.* **2004**, *69*, 3943.
- [20] W. Pei, J. Mo and J. Xiao. *J. Organomet. Chem.* **2005**, *690*, 3546.
- [21] K. Hayamizu and O. Yamamoto. *J. Mol. Spectrosc.* **1968**, *28*, 89.
- [22] B.-C. Hong, H.-C. Tseng and S.-H. Chen. *Tetrahedron* **2007**, *63*, 2840.
- [23] C. Jin, J. P. Burgess, J. A. Kepler and C. E. Cook. *Org. Lett.* **2007**, *9*, 1887.
- [24] M. Iinuma, K. Moriyama, and H. Togo. *Tetrahedron* **2013**, *69*, 2961.

## 5. The reaction practicability emanations

### 5.1 Reaction with low catalyst loading

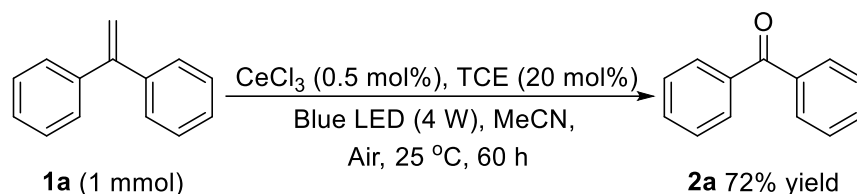

A mixture of ethene-1,1-diyl dibenzene (1.0 mmol, 180.1 mg),  $\text{CeCl}_3$  (0.5 mol%, 1.3 mg),  $\text{CCl}_3\text{CH}_2\text{OH}$  (20 mol%, 29.8 mg) and  $\text{CH}_3\text{CN}$  (4.0 mL) was added into a quartz tube which was placed in a photochemical reactor (Blue LED, 405-410 nm, 4 W). The reaction mixture was stirred at 25 °C under air for 60 h. After concentrated under reduced pressure, the residue was purified by flash column chromatography on silica gel and eluted with EtOAc/petroleum ether (1/100~10/1) to afford the desired product.

### 5.2 5 mmol scale reaction

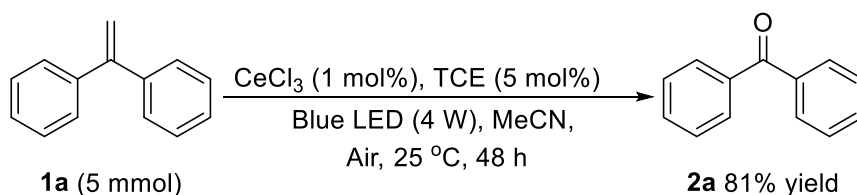

A mixture of ethene-1,1-diyl dibenzene (5.0 mmol, 901.3 mg),  $\text{CeCl}_3$  (1 mol%, 13.5 mg),  $\text{CCl}_3\text{CH}_2\text{OH}$  (5 mol%, 37.4 mg) and  $\text{CH}_3\text{CN}$  (10.0 mL) was added into a quartz tube which was placed in a photochemical reactor (Blue LED, 405-410 nm, 4 W). The reaction mixture was stirred at 25 °C

under air for 48 h. After concentrated under reduced pressure, the residue was purified by flash column chromatography on silica gel and eluted with EtOAc/petroleum ether (1/100~10/1) to afford the desired product.

## 6. Mechanistic studies

### 6.1 Control experiments

To explore the reaction mechanism for our oxidative process, some control experiments were first carried out.

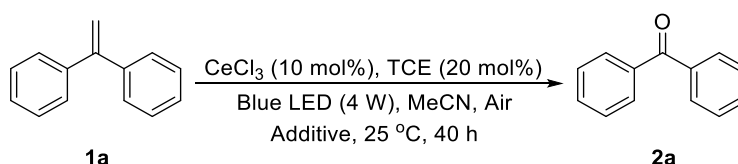

| Entry | Additive                   | Yield (%)   |
|-------|----------------------------|-------------|
| 1     | No catalyst                | No reaction |
| 2     | No light                   | No reaction |
| 3     | N <sub>2</sub> -atmosphere | No reaction |

Reaction condition: **1a** (0.2mmol), CeCl<sub>3</sub> (10 mol%), TCE (20 mol%), CH<sub>3</sub>CN (1.0 mL) at room temperature (25°C), Blue LED (5 W) for 40 h.

The results demonstrated that light, Ce catalyst and air, none of these three can be excluded. The absence of any one lead to the complete inhibition of this oxidative process.

## 6.2 Radical scavenger effect studies

To further investigate the reaction mechanism for this photocatalytic reaction, radical scavengers, such as TEMPO and BHT, were employed in the standard reaction, and the reaction was inhibited obviously. This result suggested that a free radical process might be involved in the present oxidative reaction.

### a) Reaction in the presence of TEMPO

A mixture of ethene-1,1-diylidibenzene (0.2 mmol, 36.0 mg),  $\text{CeCl}_3$  (10 mol%, 4.9 mg),  $\text{CCl}_3\text{CH}_2\text{OH}$  (20 mol%, 5.9 mg), TEMPO (0.4 mmol, 62.4 mg) and  $\text{CH}_3\text{CN}$  (1.0 mL) was added into a quartz tube which was placed in a photochemical reactor (Blue LED, 405-410 nm, 4 W)). The reaction mixture was stirred at 25 °C under air. After 40 h, no desired product was observed.

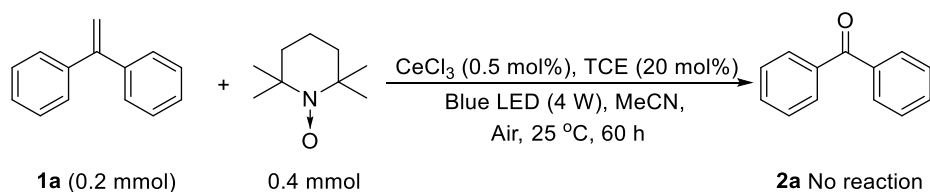

### b) Reaction in the presence of BHT

A mixture of ethene-1,1-diylidibenzene (0.2 mmol, 36.0 mg),  $\text{CeCl}_3$  (10 mol%, 4.9 mg),  $\text{CCl}_3\text{CH}_2\text{OH}$  (20 mol%, 5.9 mg), BHT (0.4 mmol, 88.1 mg) and  $\text{CH}_3\text{CN}$  (1.0 mL) was added into a quartz tube which was placed in a photochemical reactor (Blue LED, 405-410 nm, 4 W)). The

reaction mixture was stirred at 25 °C under air. After 40 h, only trace amount of product was observed.

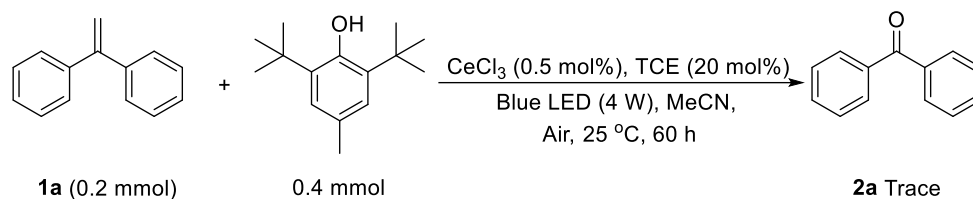

### 6.3 Quenching experiments

Finally, some quenching reagents were subjected to the reaction.

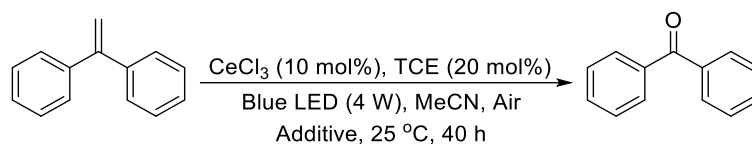

| Entry | Quenching reagent            | Yield (%) |
|-------|------------------------------|-----------|
| 1     | $\text{CuCl}_2$ (1.0 equiv.) | Trace     |
| 2     | Benzoquinone (1.0 equiv.)    | 8%        |

Reaction condition: **1a** (0.2mmol),  $\text{CeCl}_3$  (10 mol%), TCE (20 mol%),  $\text{CH}_3\text{CN}$  (1.0 mL) at room temperature (25°C), Blue LED (5 W) for 40 h.

When  $\text{CuCl}_2$  was added, only trace amount of product was observed, which proved the involvement of a single electron processes. Then benzoquinone was subjected and 8% of product was obtained, demonstrating superoxide radicals was involved in the reaction.

### 6.4 $^{18}\text{O}$ labeling experiment

In order to show the actual source of oxygen in the ketone product,  $\text{H}_2^{18}\text{O}$  was first used to instead TCE as the additive for the reaction.

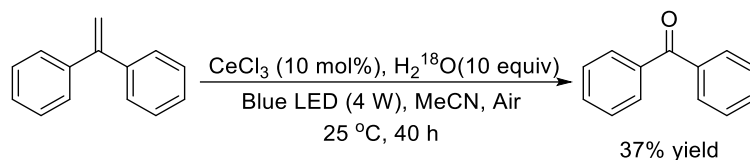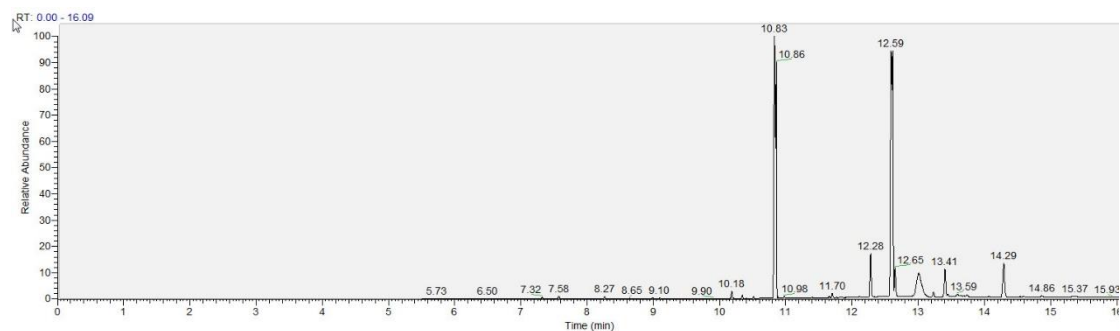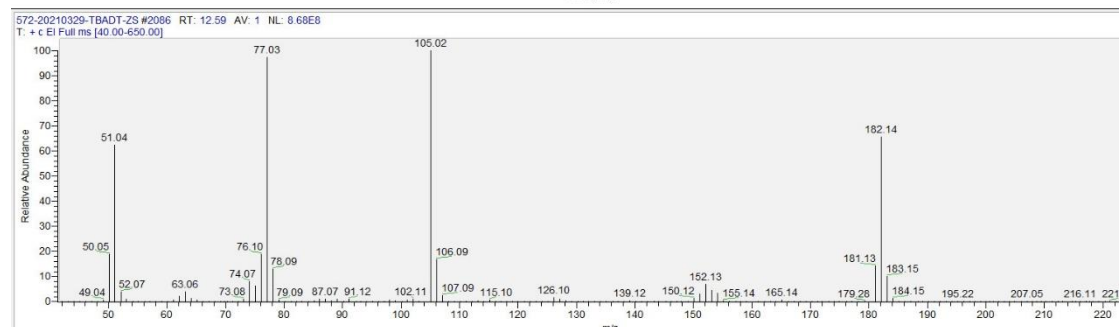

Besides, the reaction involved  $^{18}\text{O}_2$  was carried out and the  $^{18}\text{O}$  labelled product was generated in 70% yield.

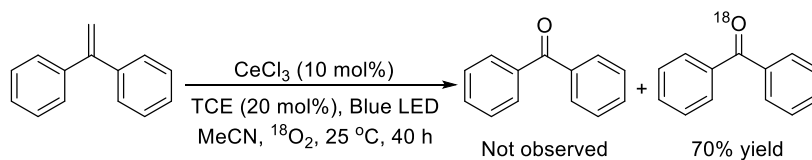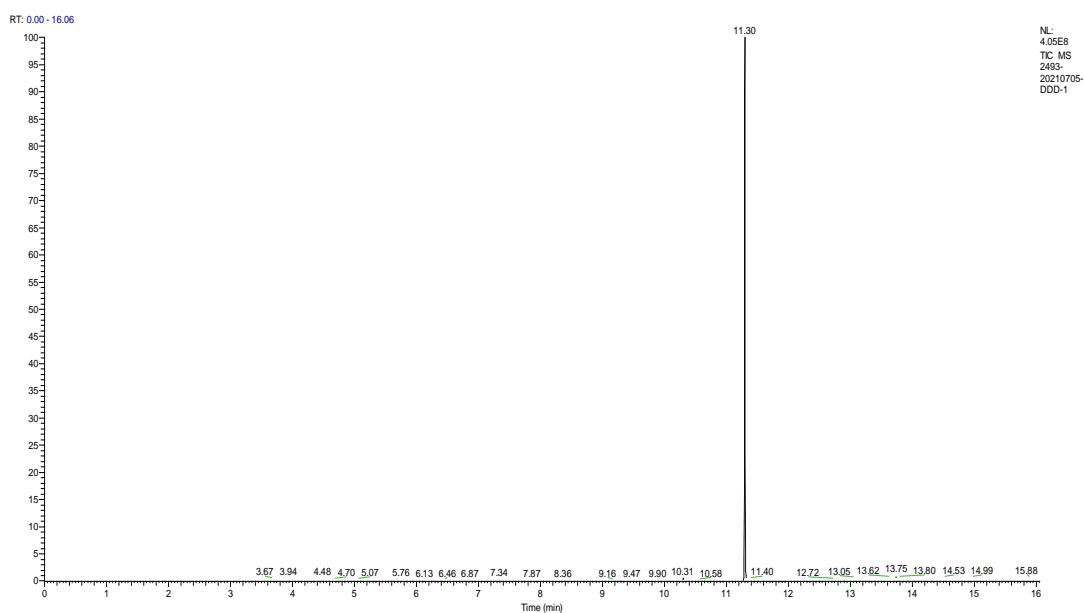

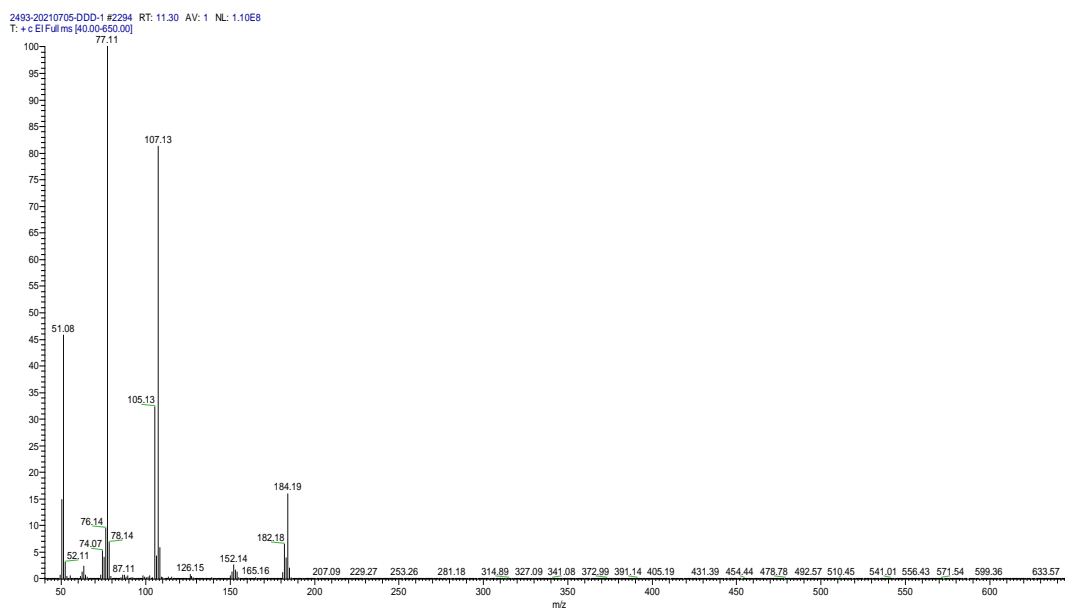

The products were detected by GC-MS and both results demonstrated that the oxygen of product was from dioxygen in the air, rather than from the H<sub>2</sub>O or alcohols.

## 7. NMR spectra

$^1\text{H}$  NMR spectrum of **2a** in  $\text{CDCl}_3$  at 400 MHz

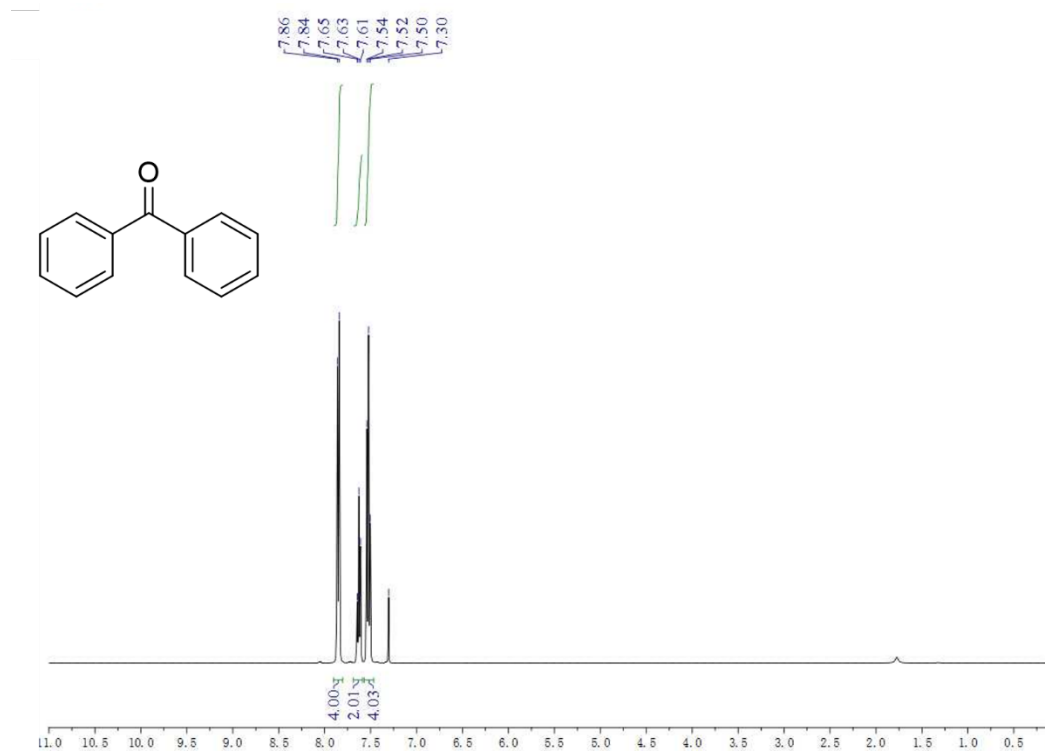

$^{13}\text{C}$  NMR spectrum of **2a** in  $\text{CDCl}_3$  at 101 MHz

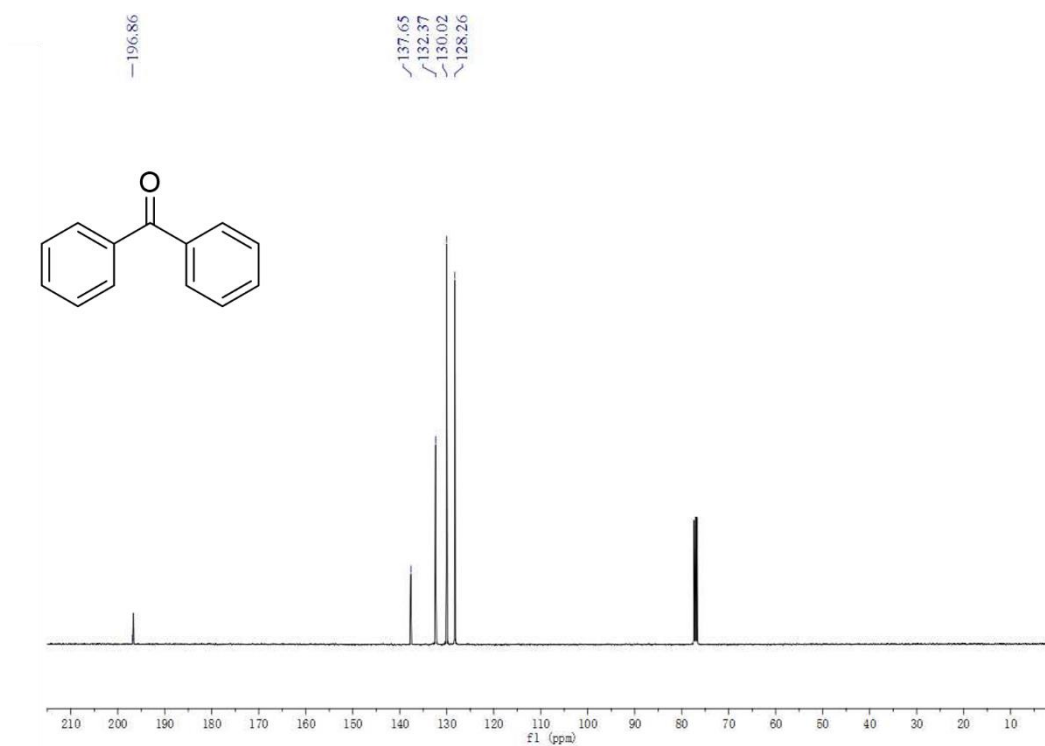

$^1\text{H}$  NMR spectrum of **2b** in  $\text{CDCl}_3$  at 400 MHz

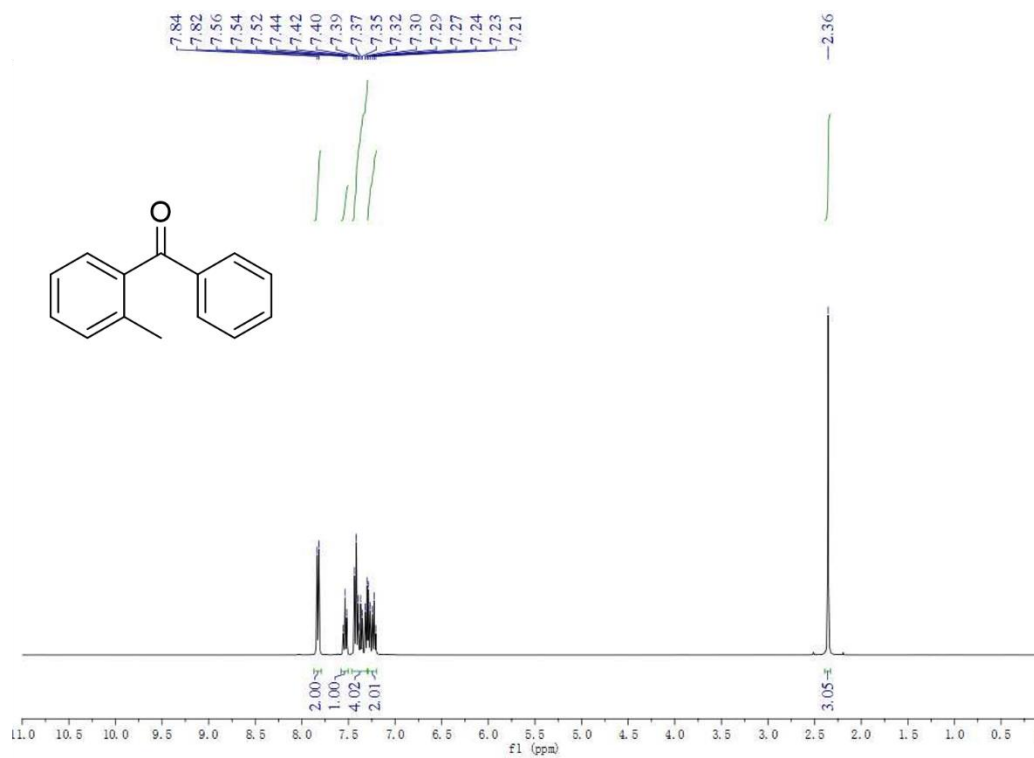

$^{13}\text{C}$  NMR spectrum of **2b** in  $\text{CDCl}_3$  at 101 MHz

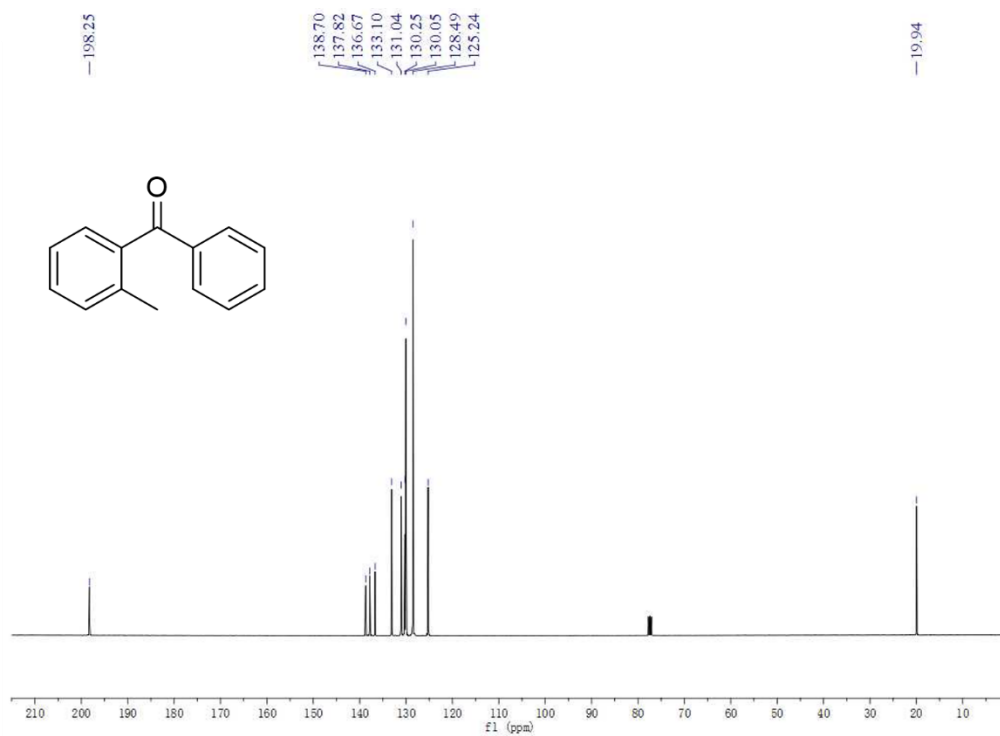

$^1\text{H}$  NMR spectrum of **2c** in  $\text{CDCl}_3$  at 400 MHz

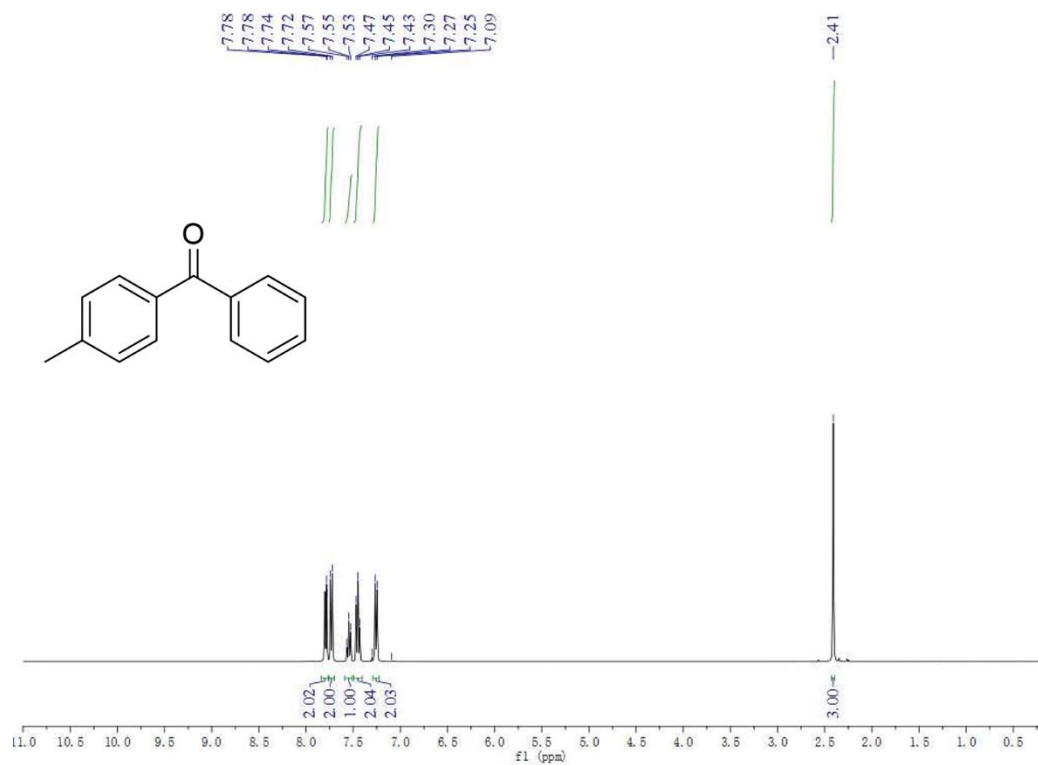

$^{13}\text{C}$  NMR spectrum of **2c** in  $\text{CDCl}_3$  at 101 MHz

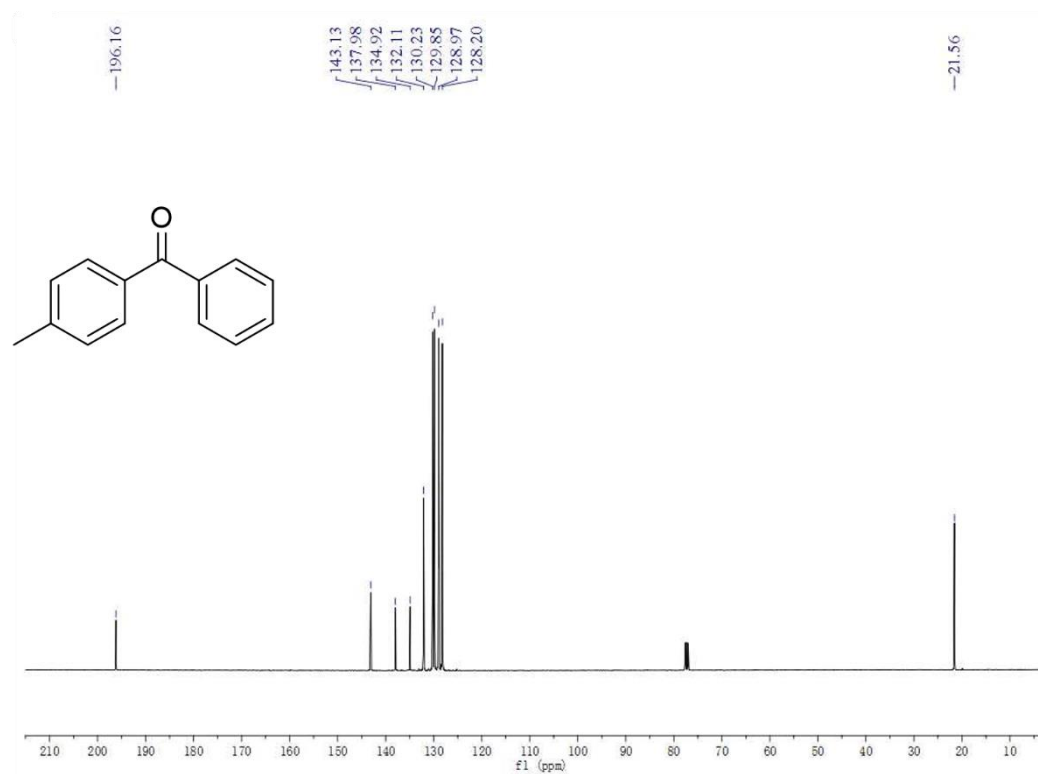

$^1\text{H}$  NMR spectrum of **2d** in  $\text{CDCl}_3$  at 400 MHz

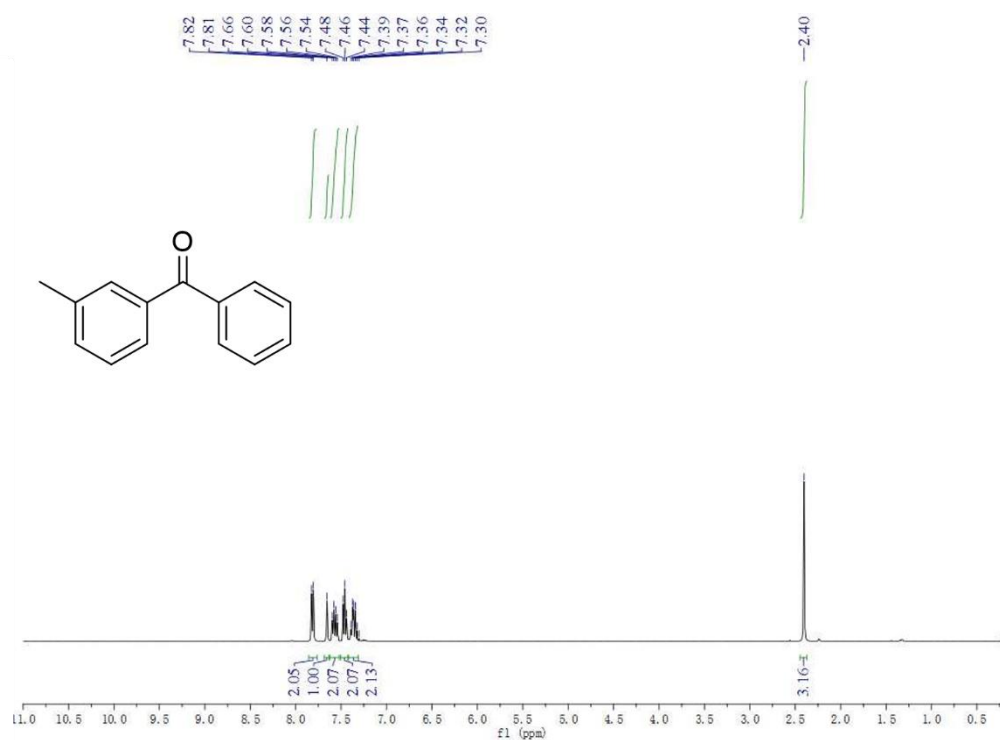

$^{13}\text{C}$  NMR spectrum of **2d** in  $\text{CDCl}_3$  at 101 MHz

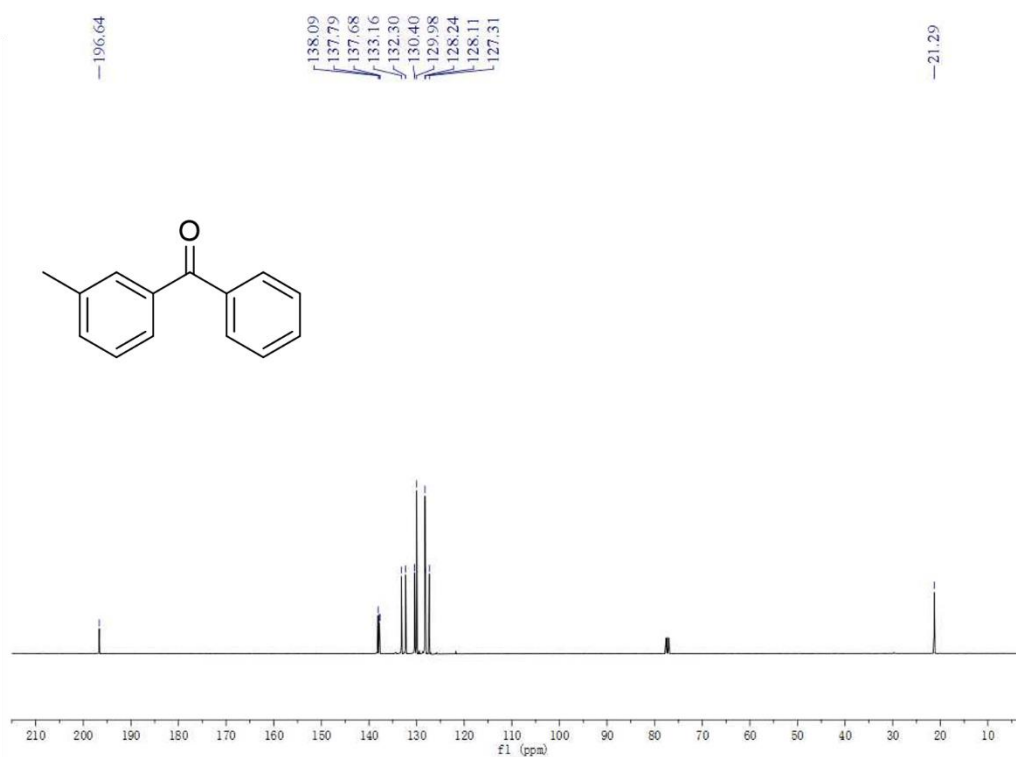

$^1\text{H}$  NMR spectrum of **2e** in  $\text{CDCl}_3$  at 400 MHz

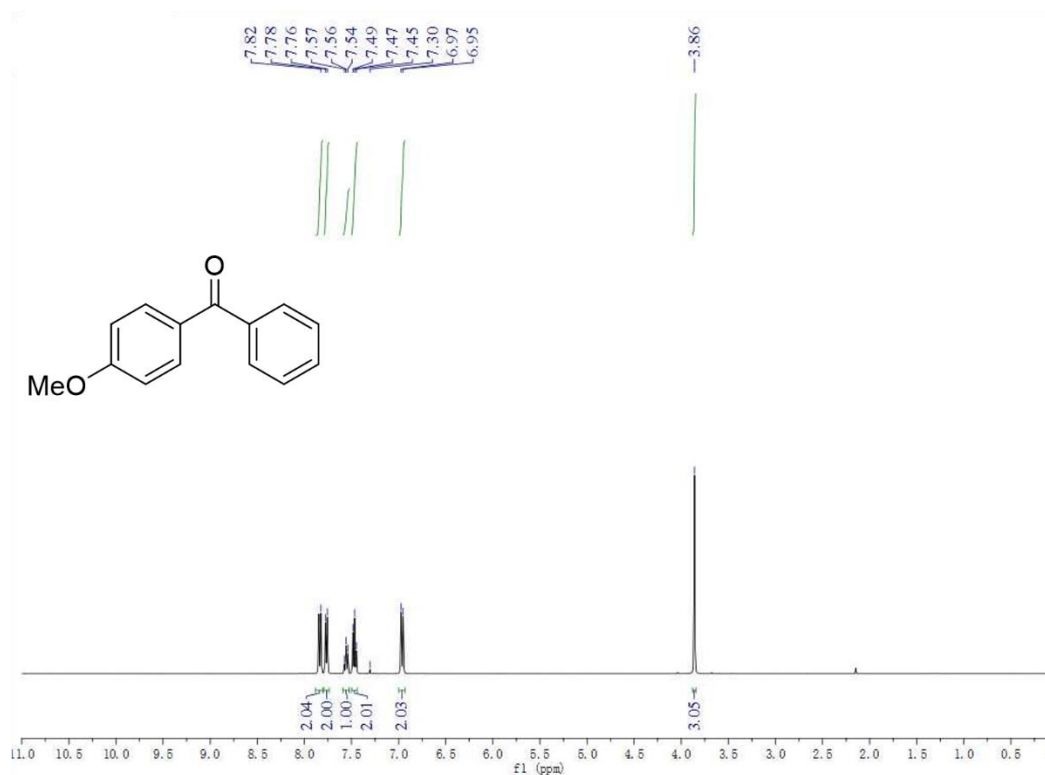

$^{13}\text{C}$  NMR spectrum of **2e** in  $\text{CDCl}_3$  at 101 MHz

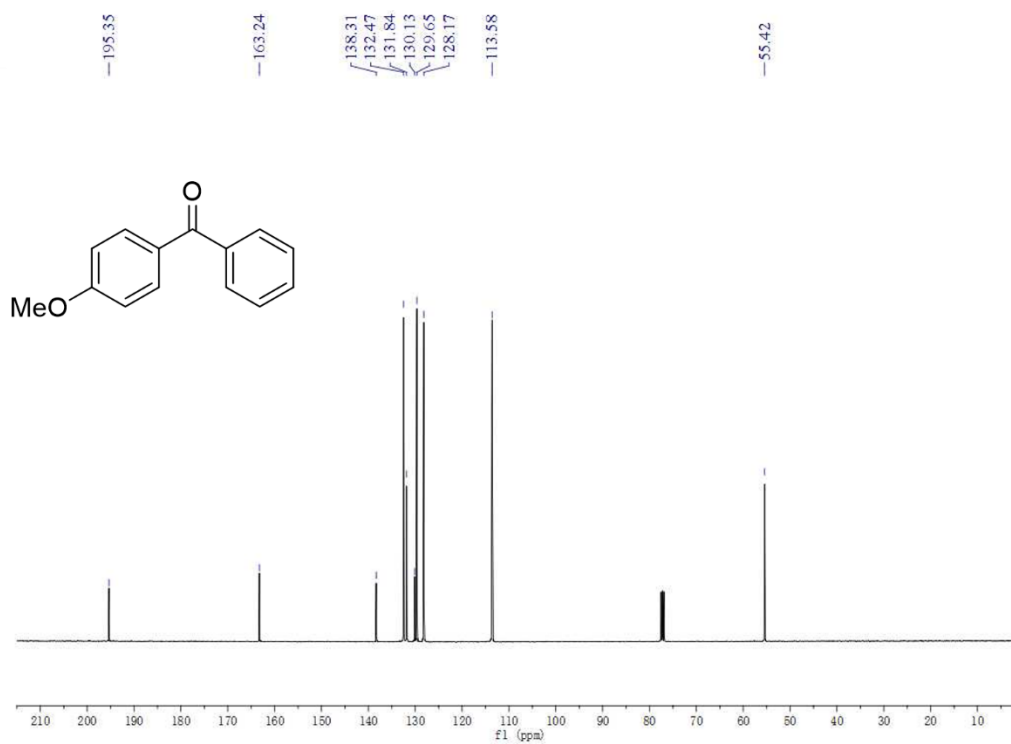

$^1\text{H}$  NMR spectrum of **2f** in  $\text{CDCl}_3$  at 400 MHz

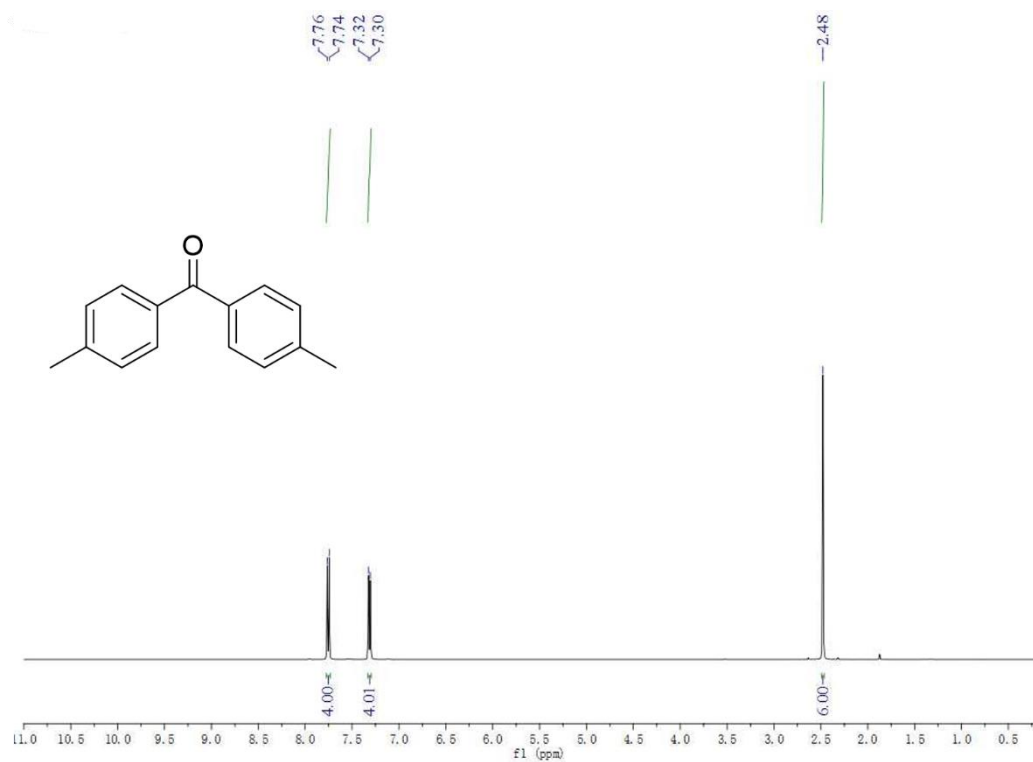

$^{13}\text{C}$  NMR spectrum of **2f** in  $\text{CDCl}_3$  at 101 MHz

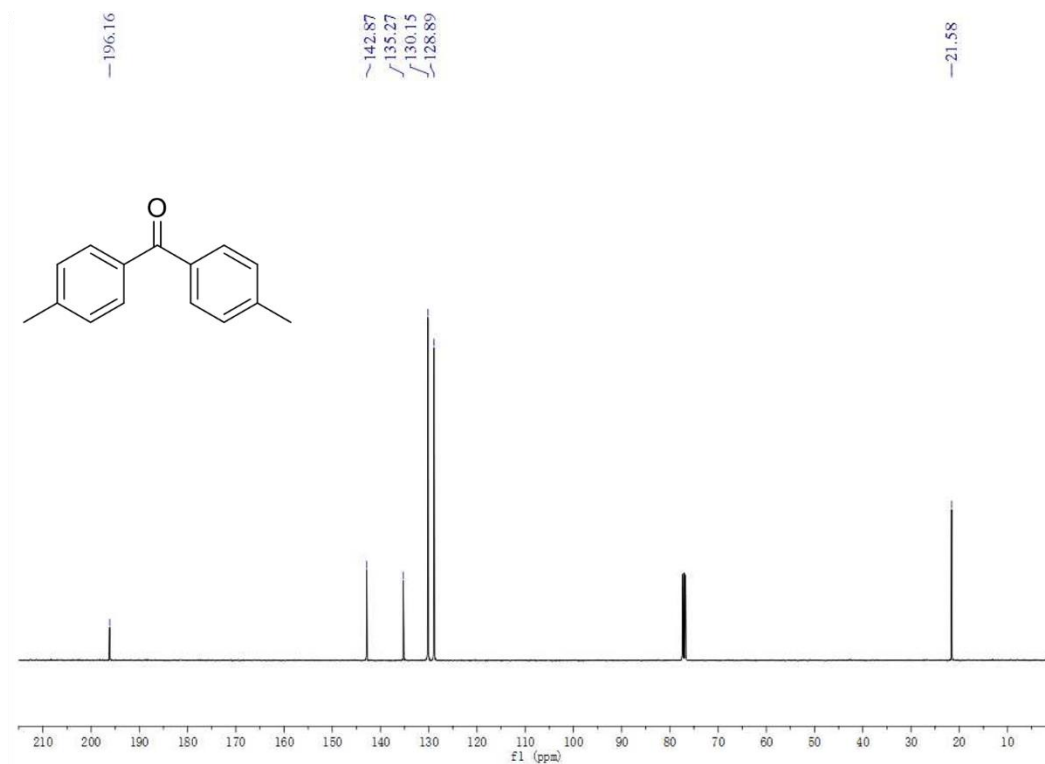

$^1\text{H}$  NMR spectrum of **2g** in  $\text{CDCl}_3$  at 400 MHz

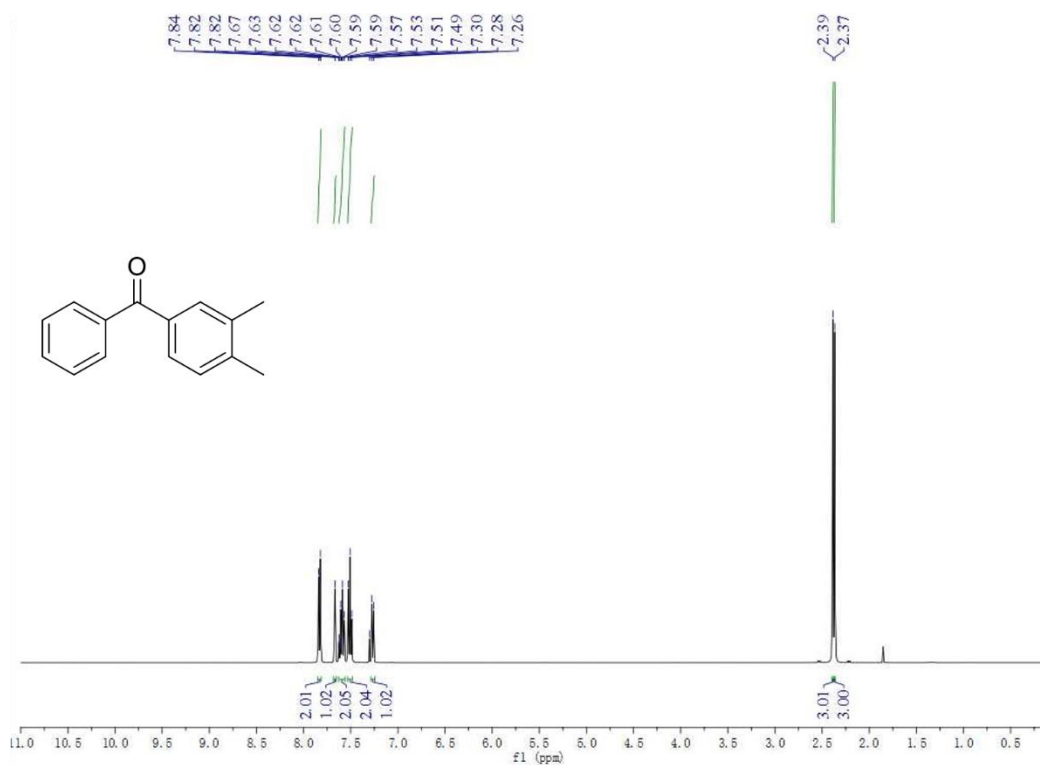

$^{13}\text{C}$  NMR spectrum of **2g** in  $\text{CDCl}_3$  at 101 MHz

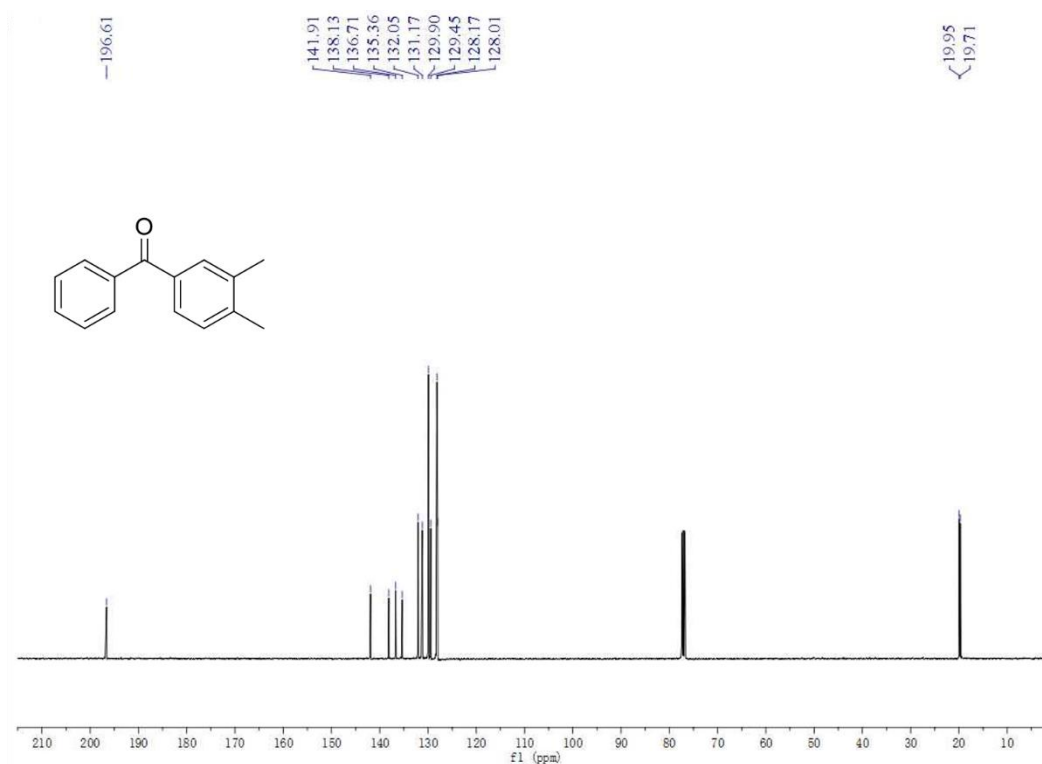

$^1\text{H}$  NMR spectrum of **2h** in  $\text{CDCl}_3$  at 400 MHz

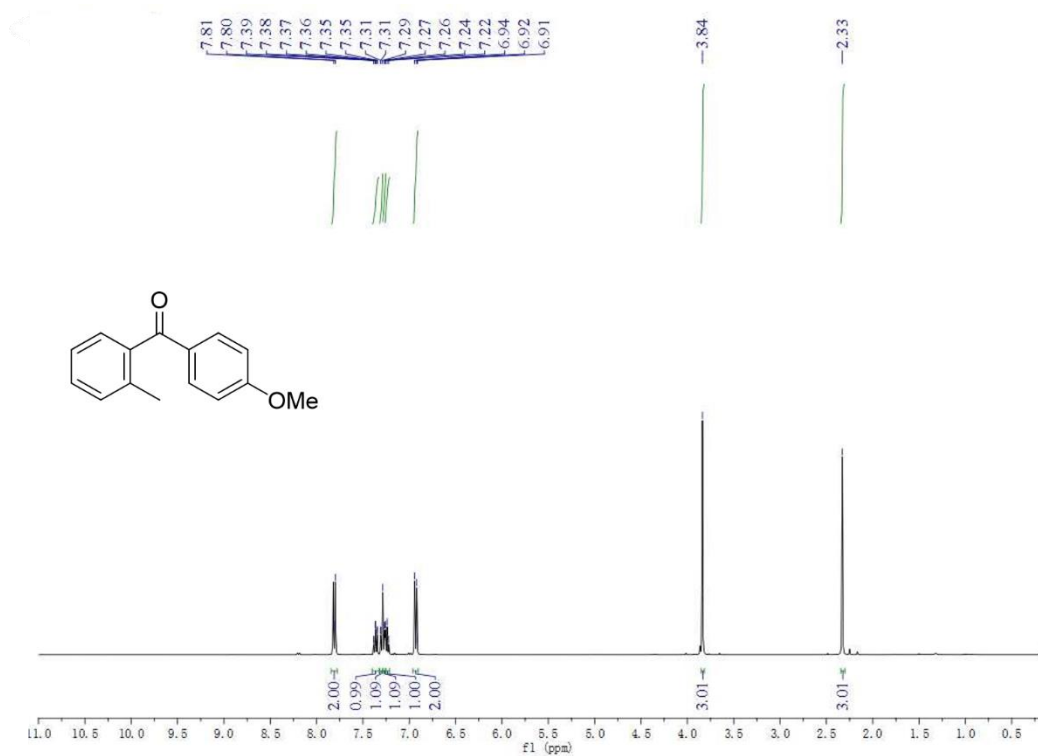

$^{13}\text{C}$  NMR spectrum of **2h** in  $\text{CDCl}_3$  at 101 MHz

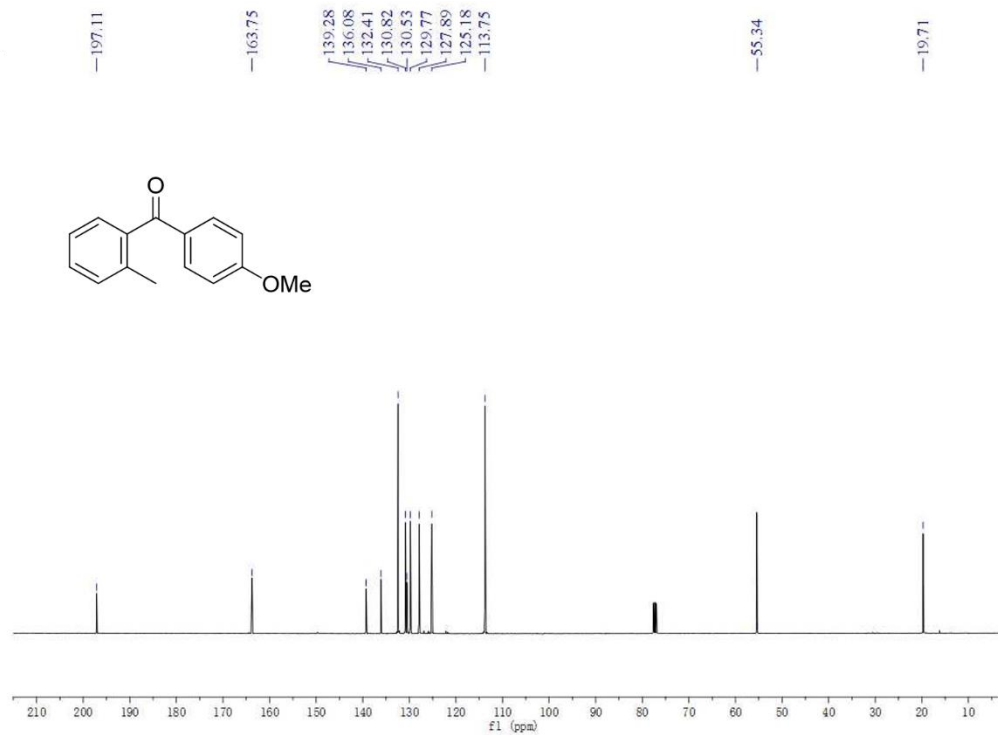

$^1\text{H}$  NMR spectrum of **2i** in  $\text{CDCl}_3$  at 400 MHz

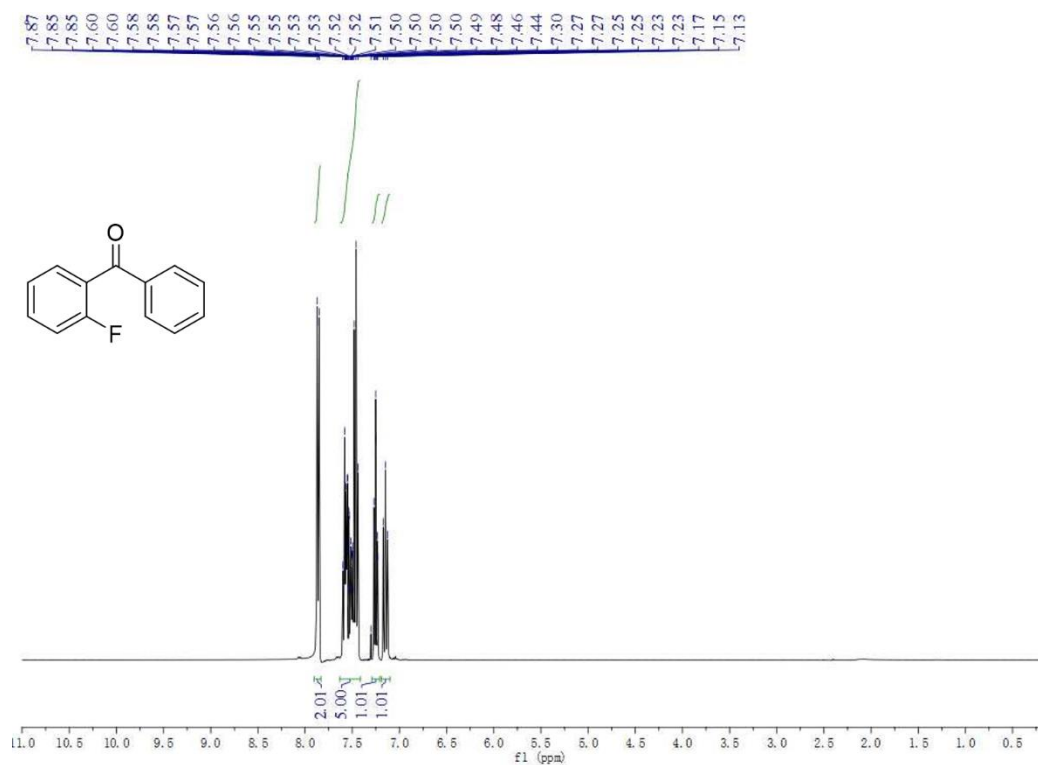

$^{13}\text{C}$  NMR spectrum of **2i** in  $\text{CDCl}_3$  at 101 MHz

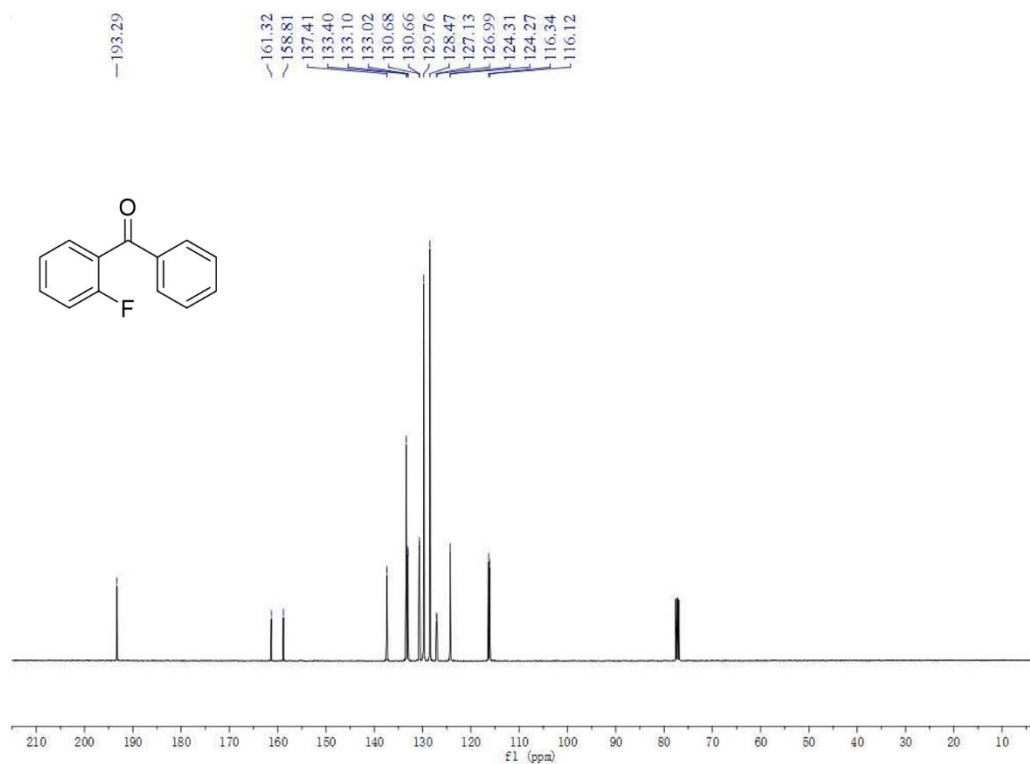

$^1\text{H}$  NMR spectrum of **2j** in  $\text{CDCl}_3$  at 400 MHz

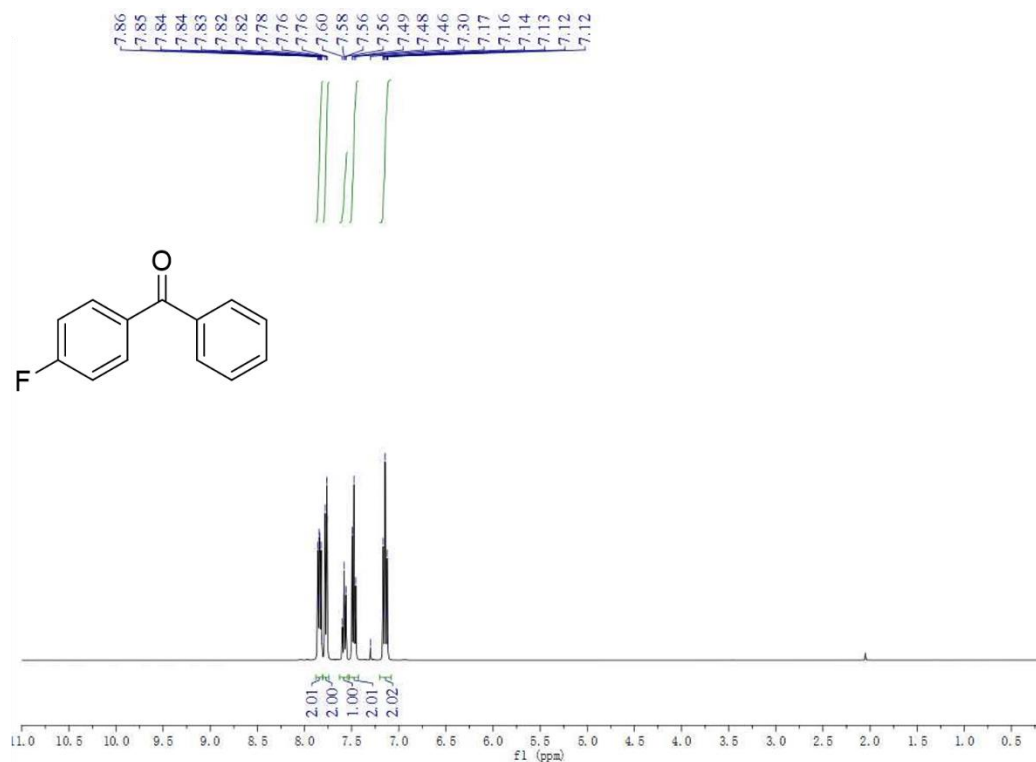

$^{13}\text{C}$  NMR spectrum of **2j** in  $\text{CDCl}_3$  at 101 MHz

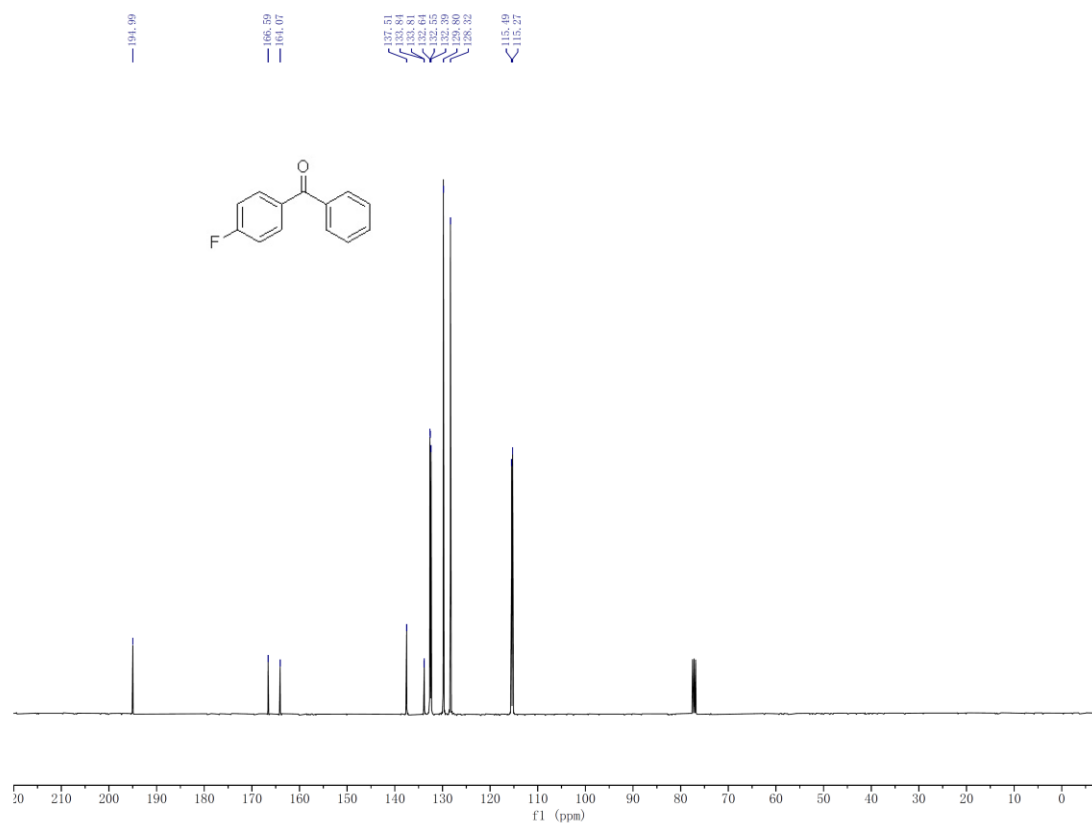

$^1\text{H}$  NMR spectrum of **2k** in  $\text{CDCl}_3$  at 400 MHz

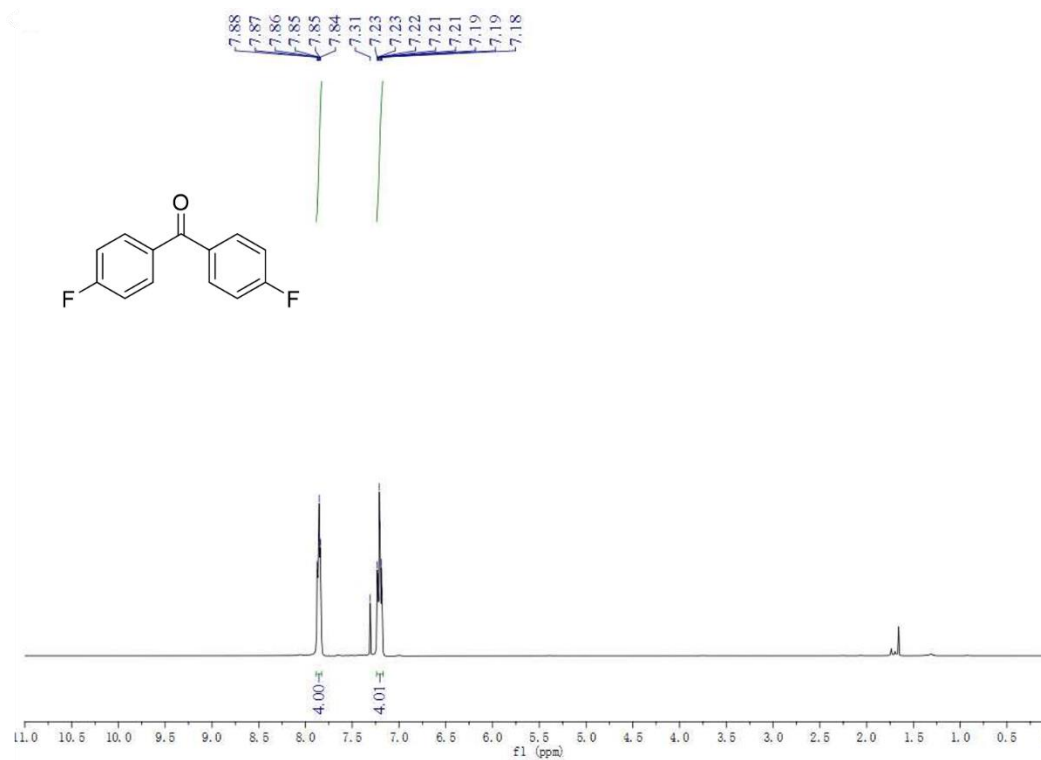

$^{13}\text{C}$  NMR spectrum of **2k** in  $\text{CDCl}_3$  at 101 MHz

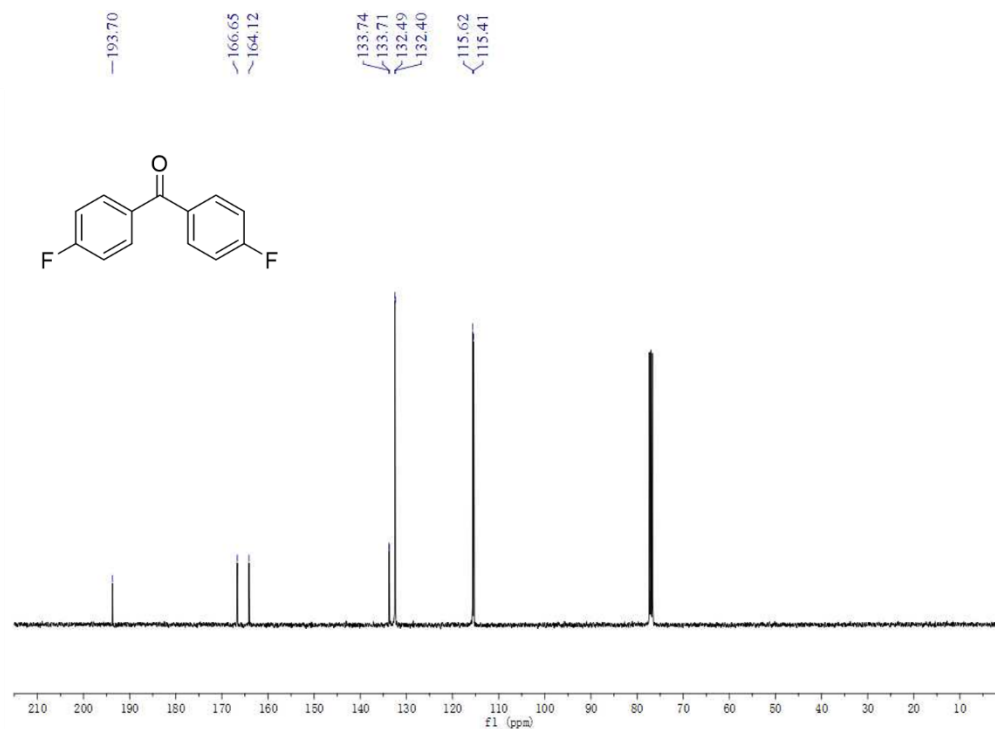

$^1\text{H}$  NMR spectrum of **2l** in  $\text{CDCl}_3$  at 400 MHz

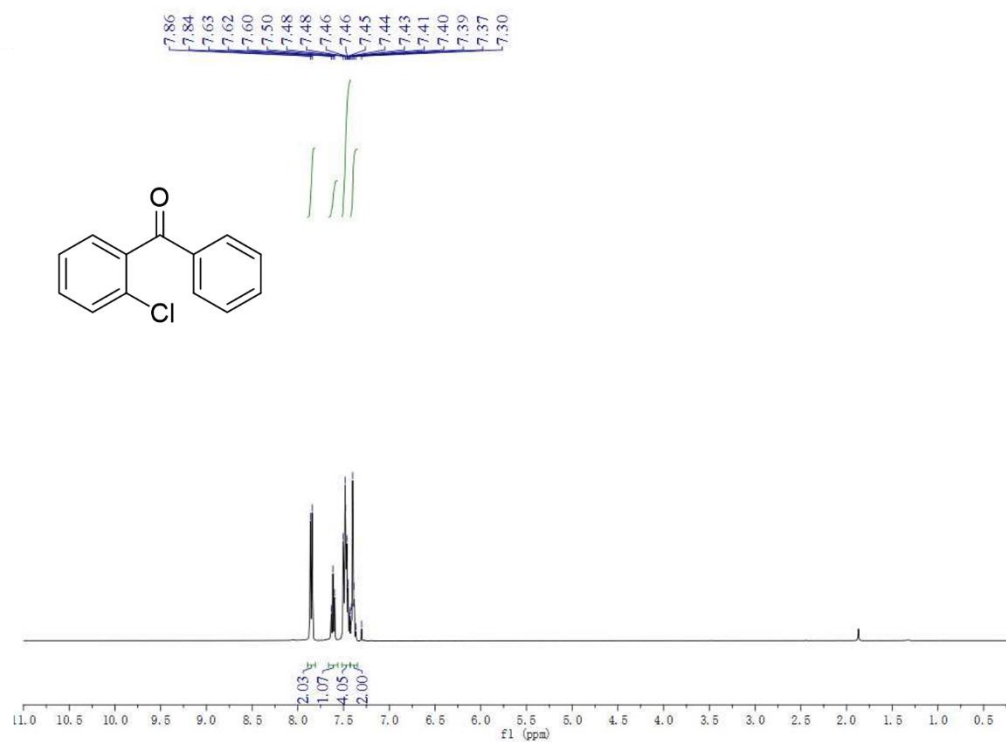

$^{13}\text{C}$  NMR spectrum of **2l** in  $\text{CDCl}_3$  at 101 MHz

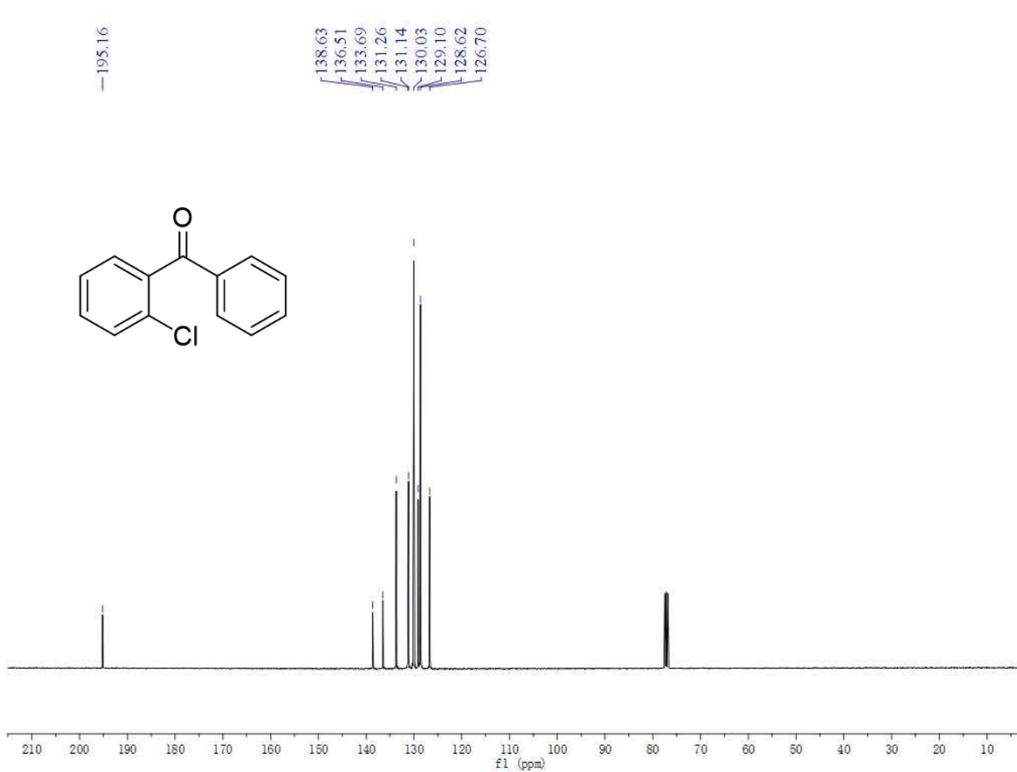

$^1\text{H}$  NMR spectrum of **2m** in  $\text{CDCl}_3$  at 400 MHz

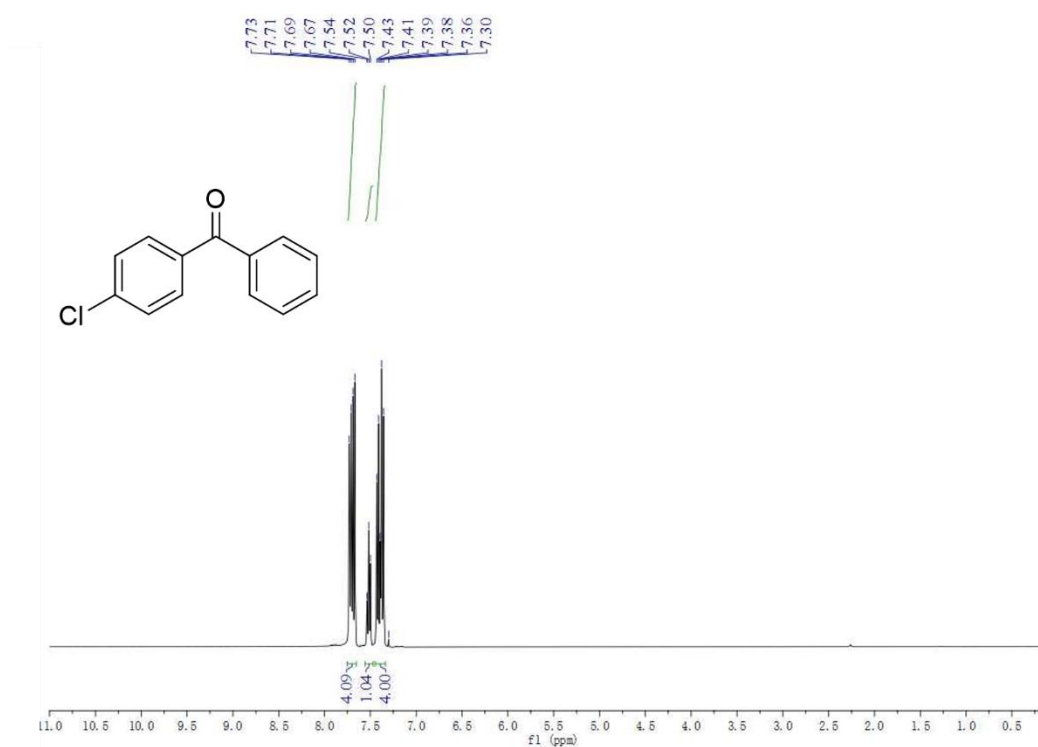

$^{13}\text{C}$  NMR spectrum of **2m** in  $\text{CDCl}_3$  at 101 MHz

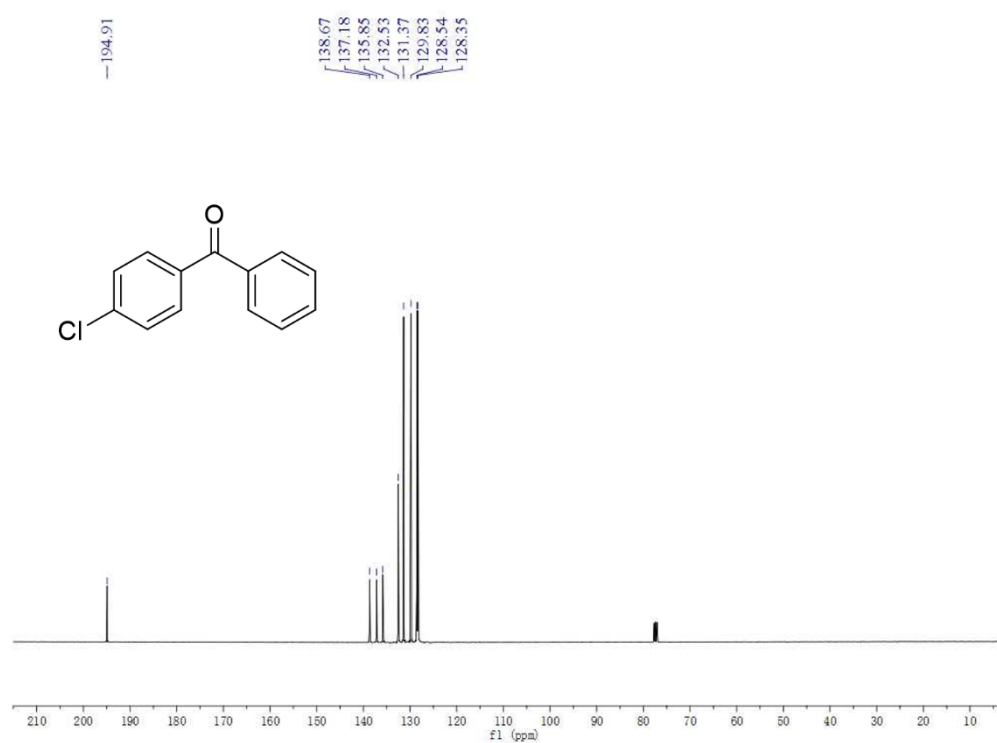

$^1\text{H}$  NMR spectrum of **2n** in  $\text{CDCl}_3$  at 400 MHz

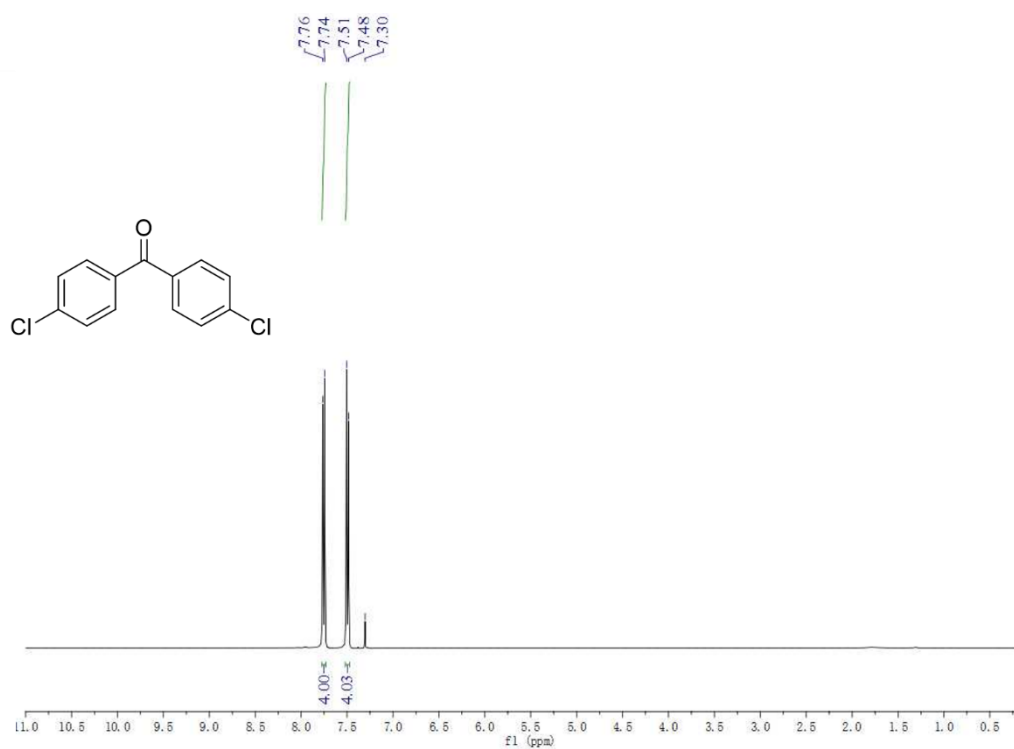

$^{13}\text{C}$  NMR spectrum of **2n** in  $\text{CDCl}_3$  at 101 MHz

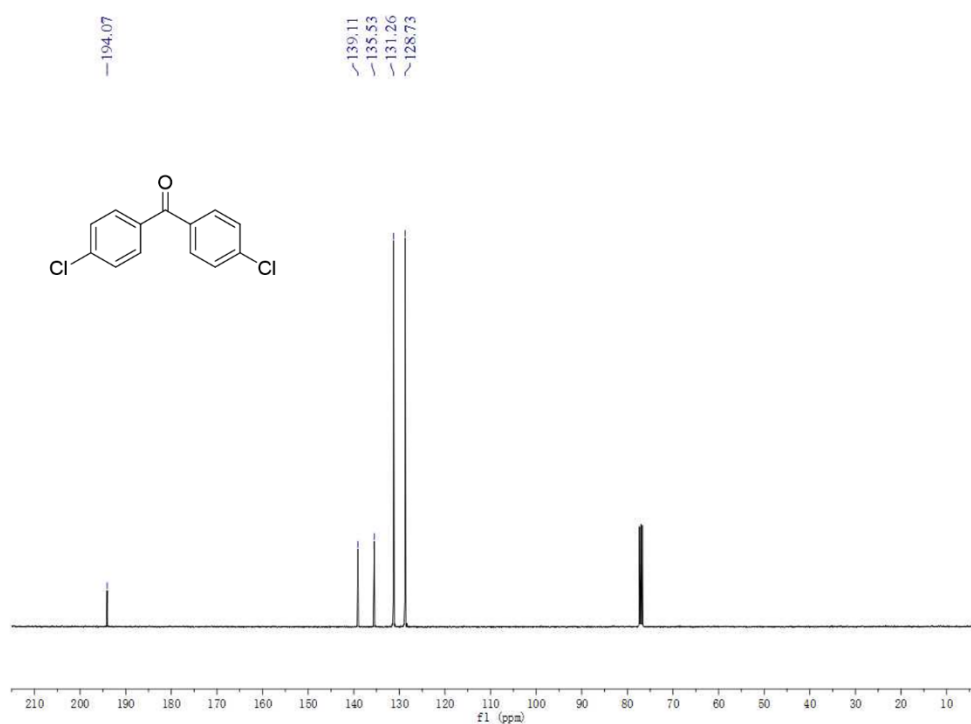

$^1\text{H}$  NMR spectrum of **2o** in  $\text{CDCl}_3$  at 400 MHz

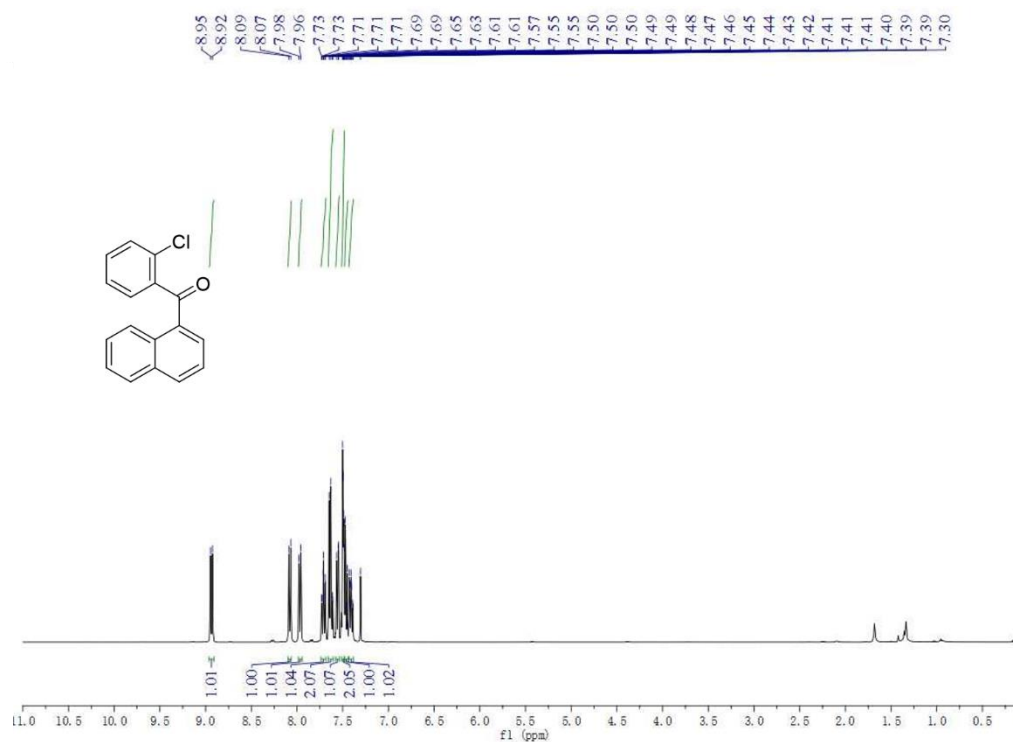

$^{13}\text{C}$  NMR spectrum of **2o** in  $\text{CDCl}_3$  at 101 MHz

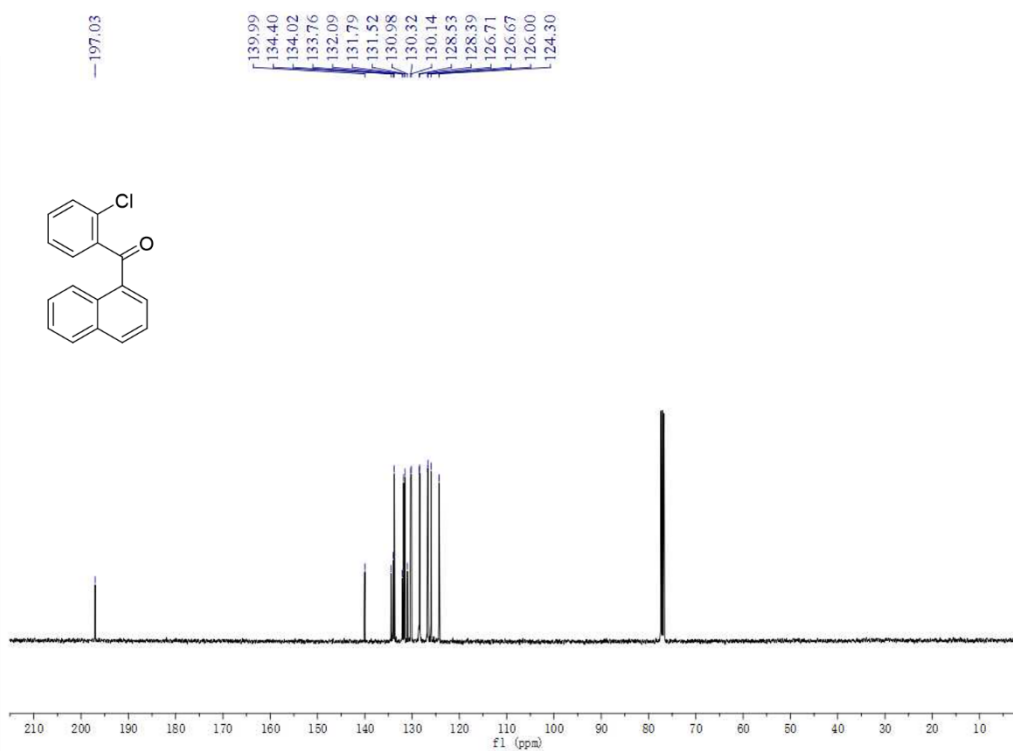

$^1\text{H}$  NMR spectrum of **2p** in  $\text{CDCl}_3$  at 400 MHz

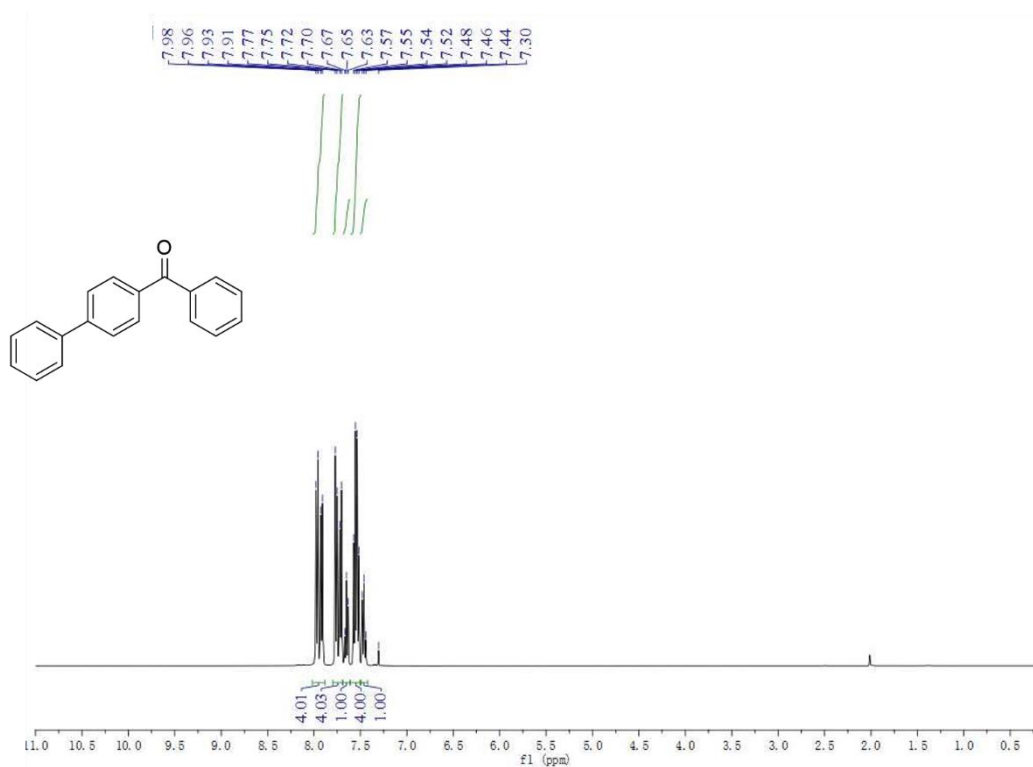

$^{13}\text{C}$  NMR spectrum of **2p** in  $\text{CDCl}_3$  at 101 MHz

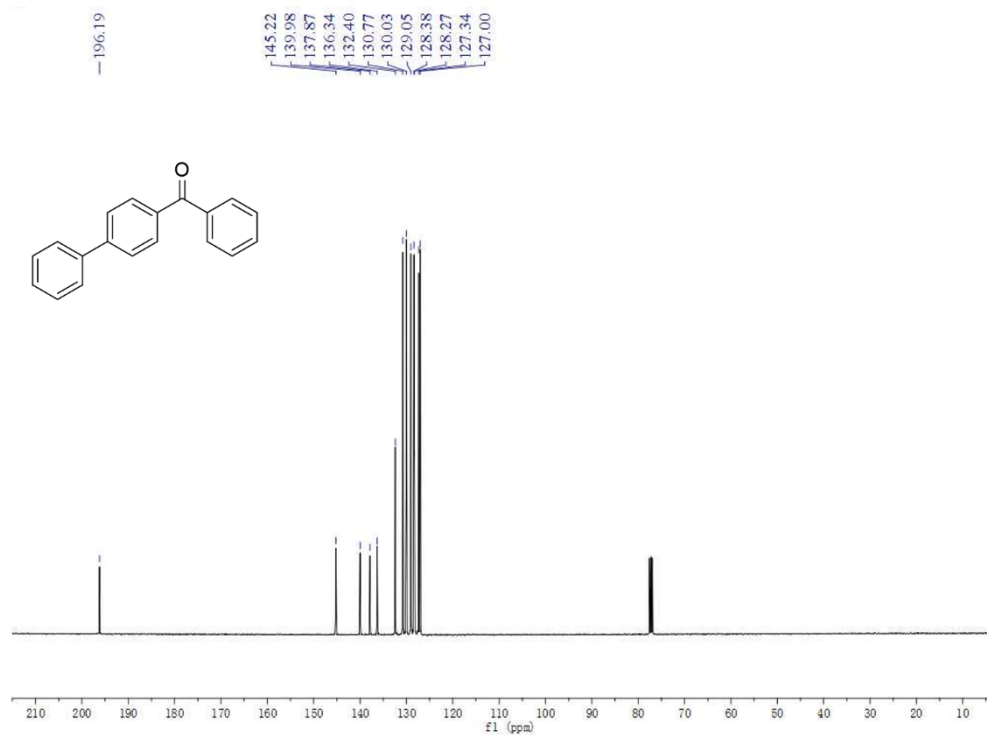

$^1\text{H}$  NMR spectrum of **2q** in  $\text{CDCl}_3$  at 400 MHz

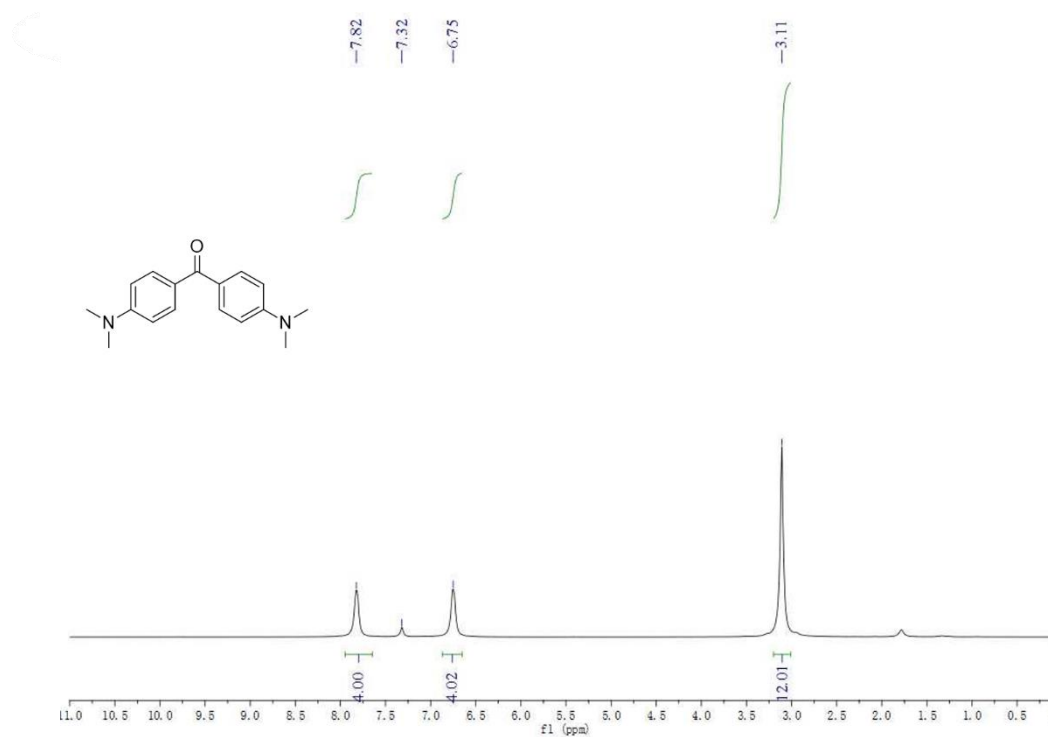

$^{13}\text{C}$  NMR spectrum of **2q** in  $\text{CDCl}_3$  at 101 MHz

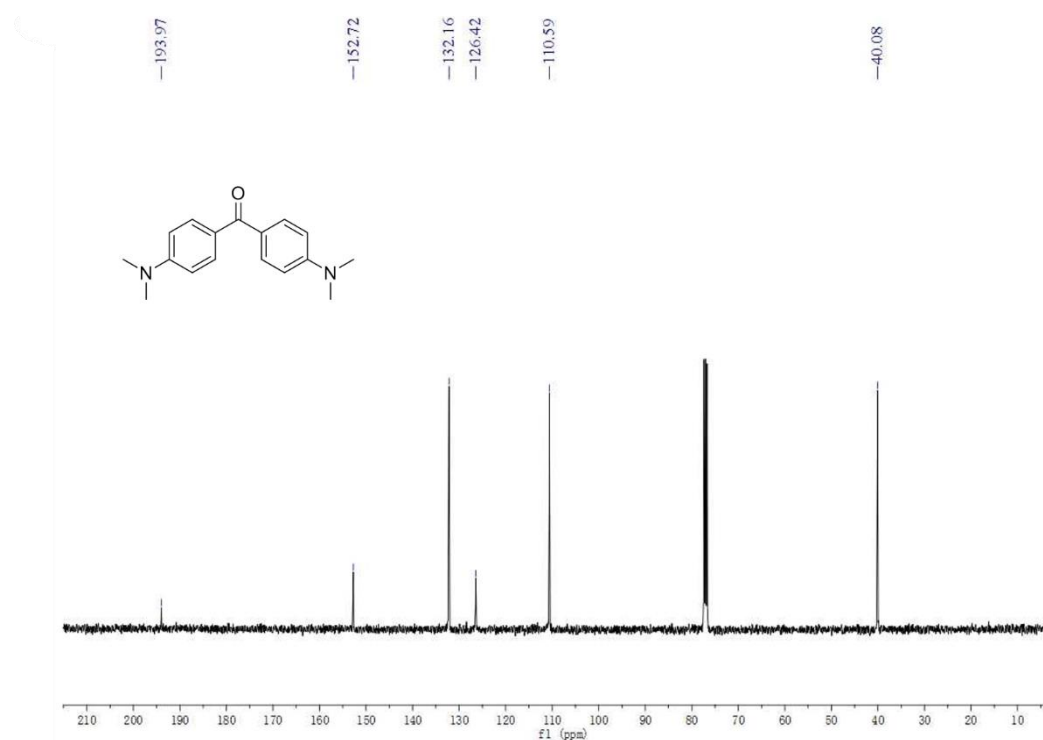

$^1\text{H}$  NMR spectrum of **2r** in  $\text{CDCl}_3$  at 400 MHz

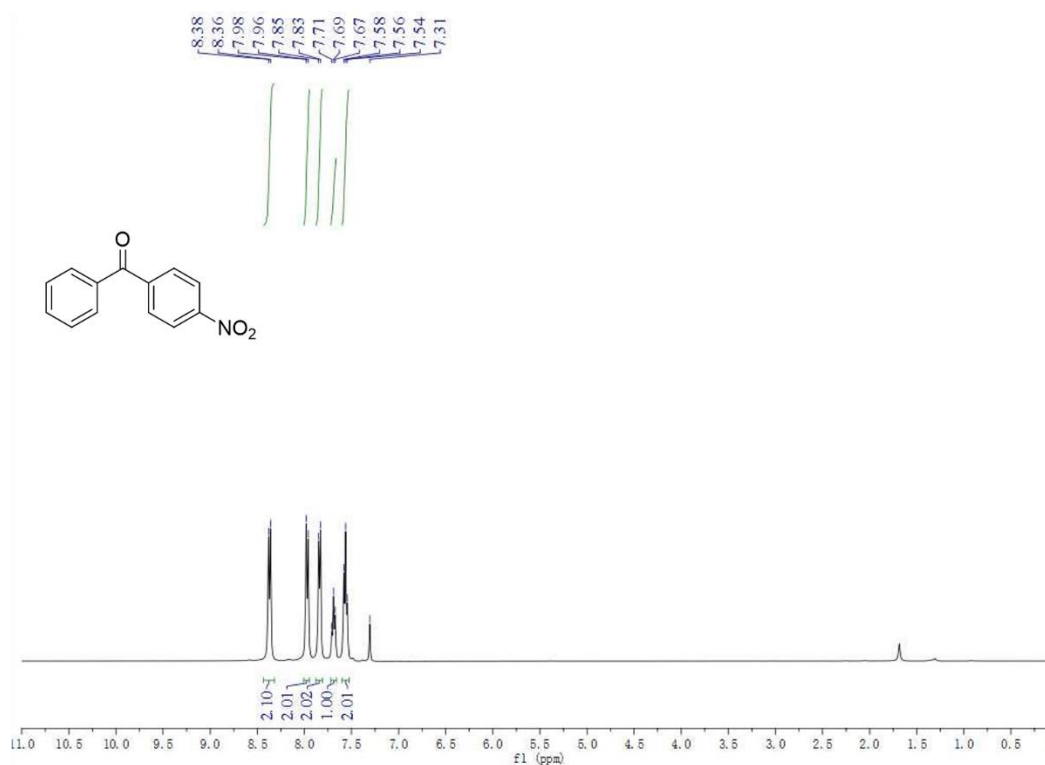

$^{13}\text{C}$  NMR spectrum of **2r** in  $\text{CDCl}_3$  at 101 MHz

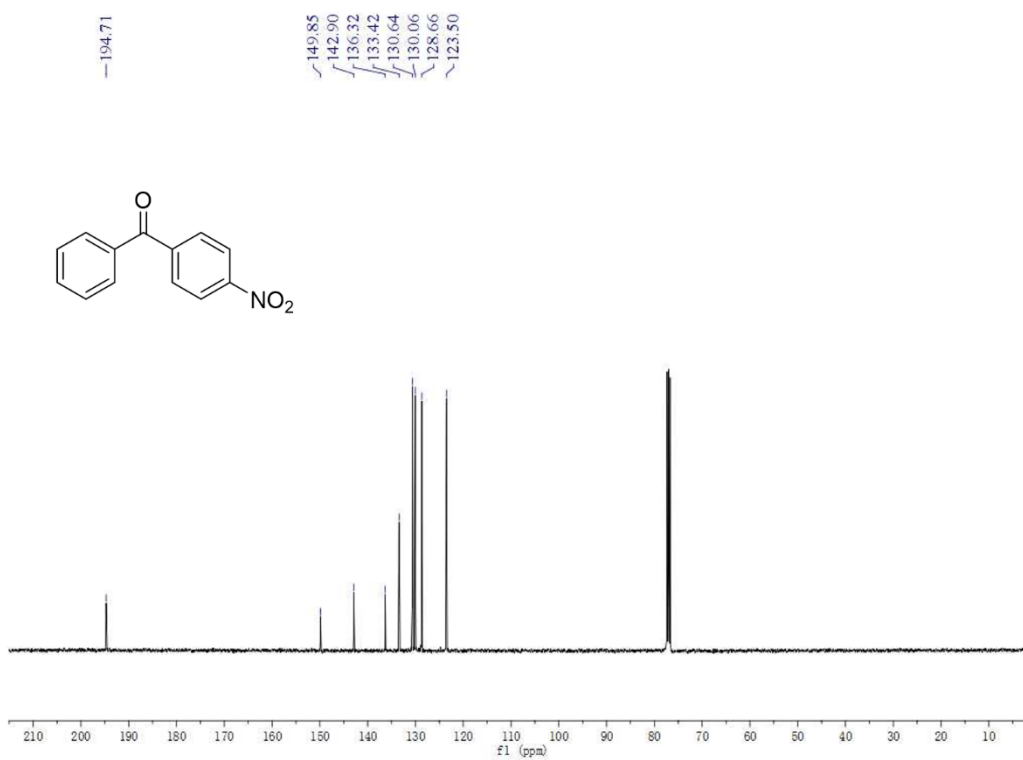

$^1\text{H}$  NMR spectrum of **2s** in  $\text{CDCl}_3$  at 400 MHz

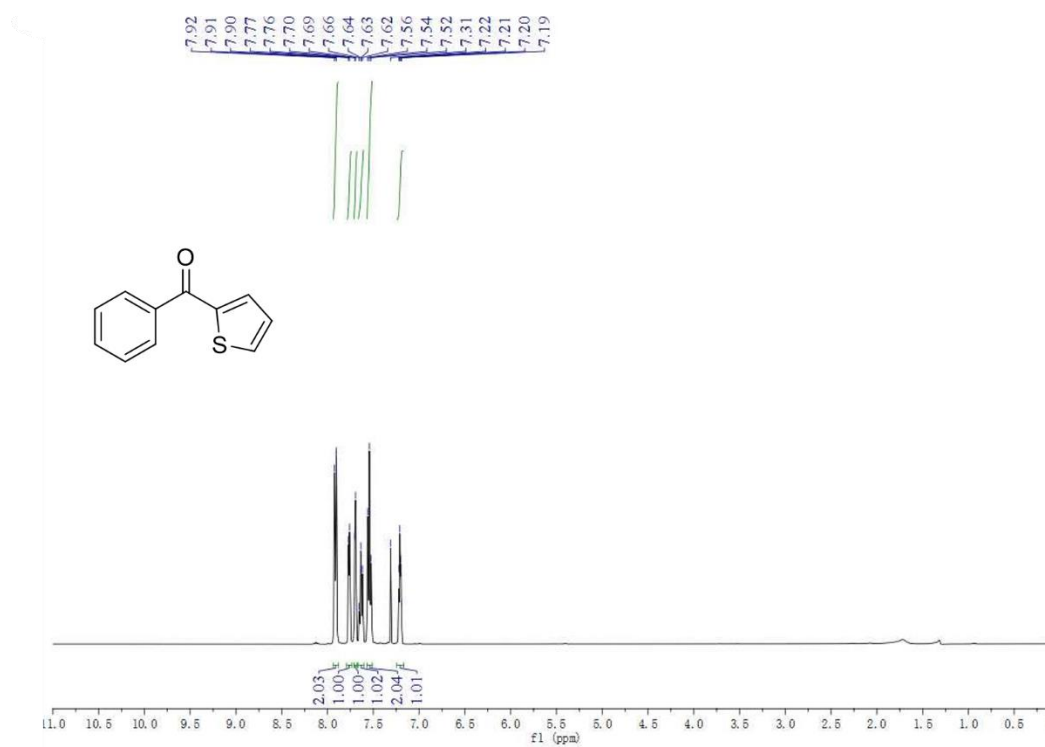

$^{13}\text{C}$  NMR spectrum of **2s** in  $\text{CDCl}_3$  at 101 MHz

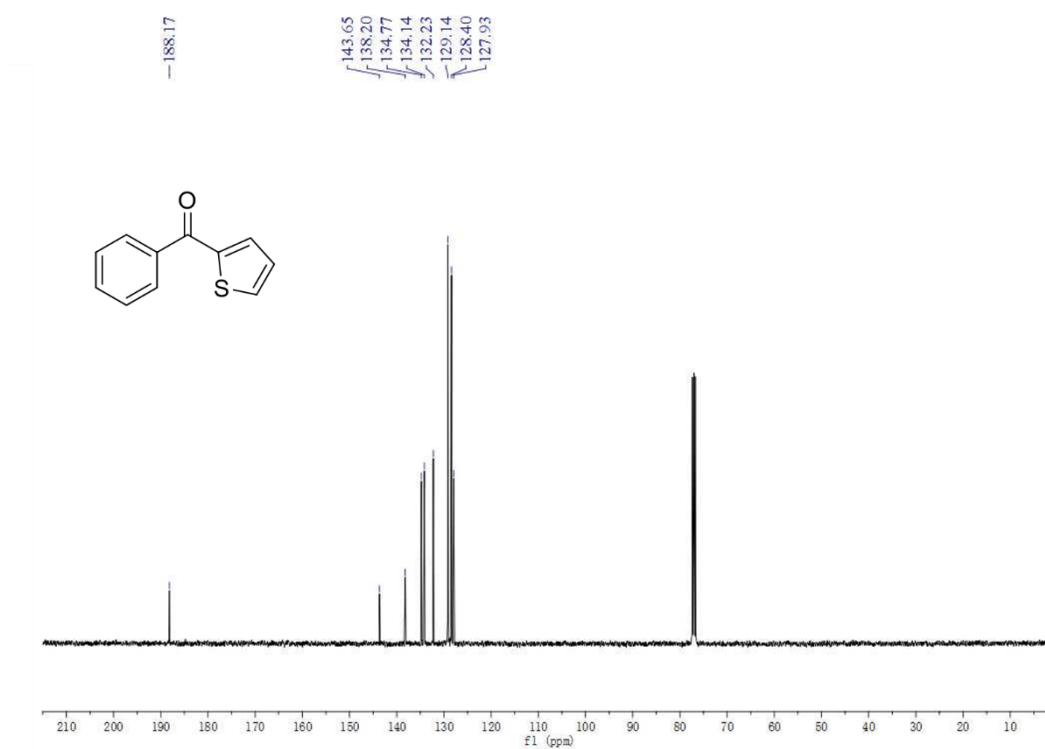

$^1\text{H}$  NMR spectrum of **2t** in  $\text{CDCl}_3$  at 400 MHz

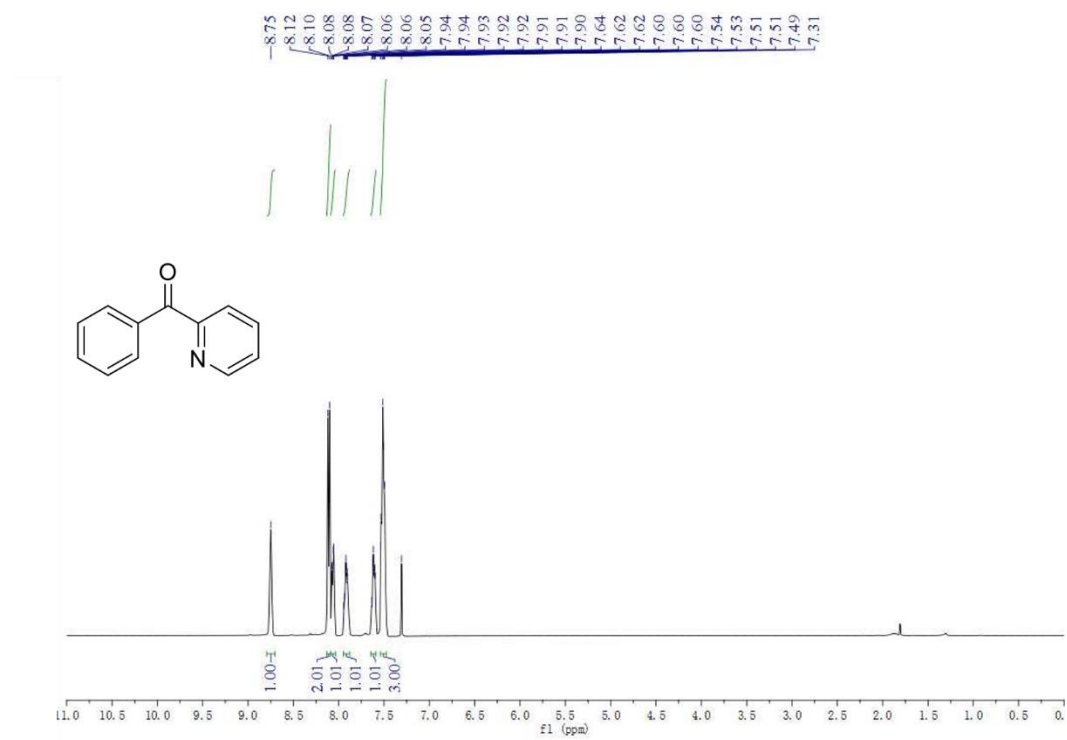

$^{13}\text{C}$  NMR spectrum of **2t** in  $\text{CDCl}_3$  at 101 MHz

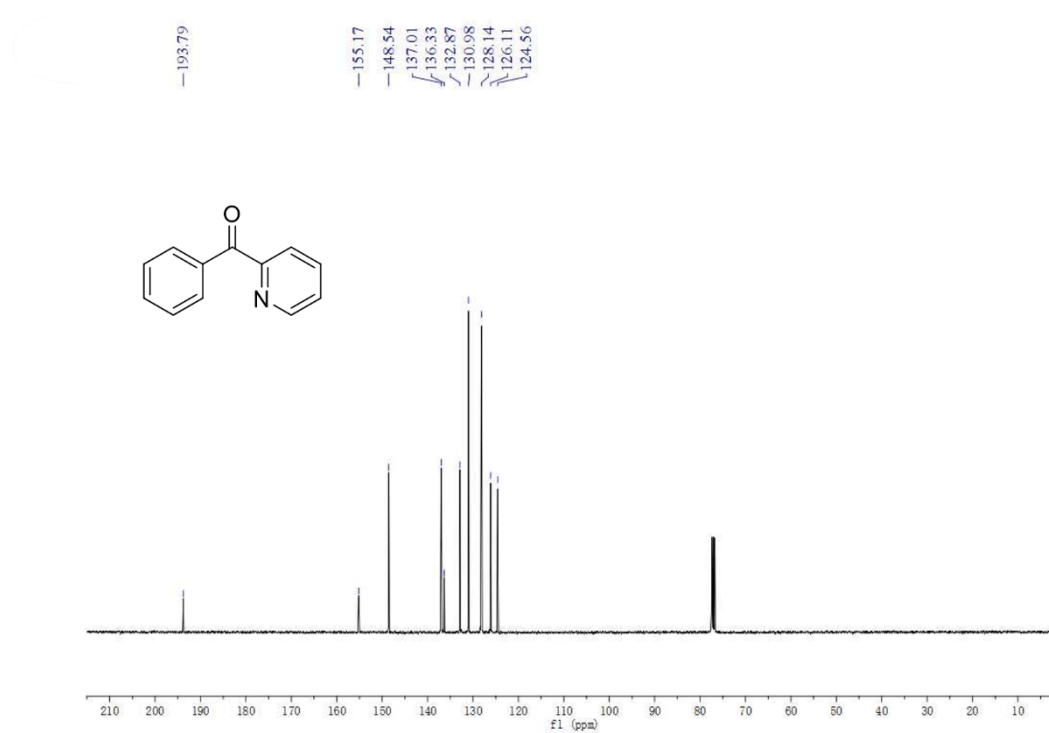

$^1\text{H}$  NMR spectrum of **2u** in  $\text{CDCl}_3$  at 400 MHz

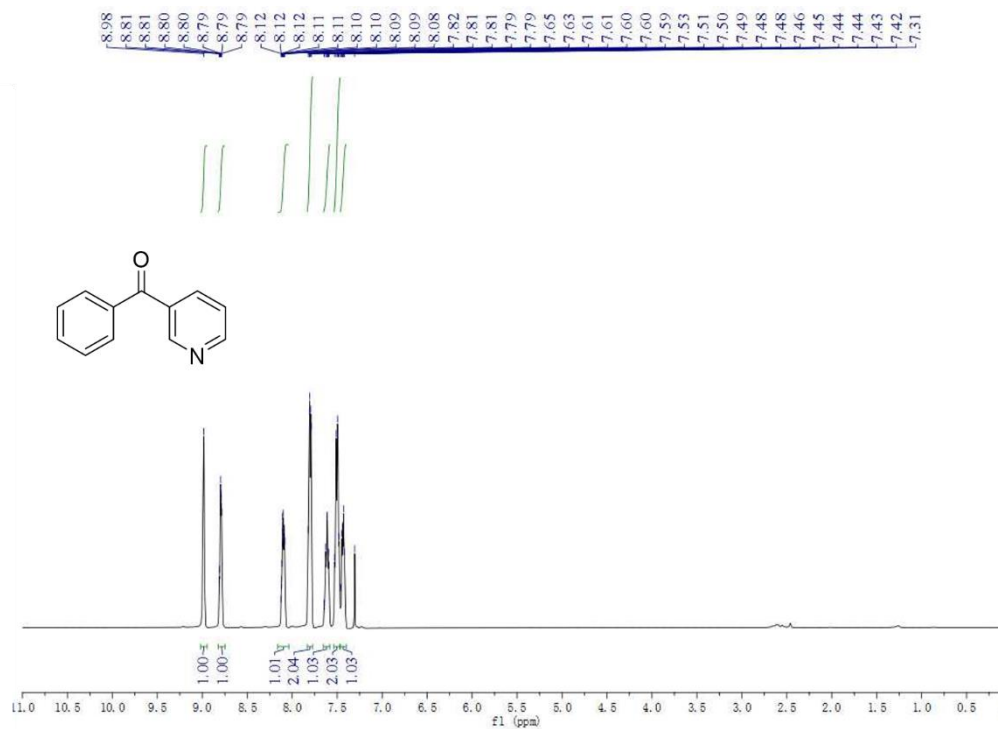

$^{13}\text{C}$  NMR spectrum of **2u** in  $\text{CDCl}_3$  at 101 MHz

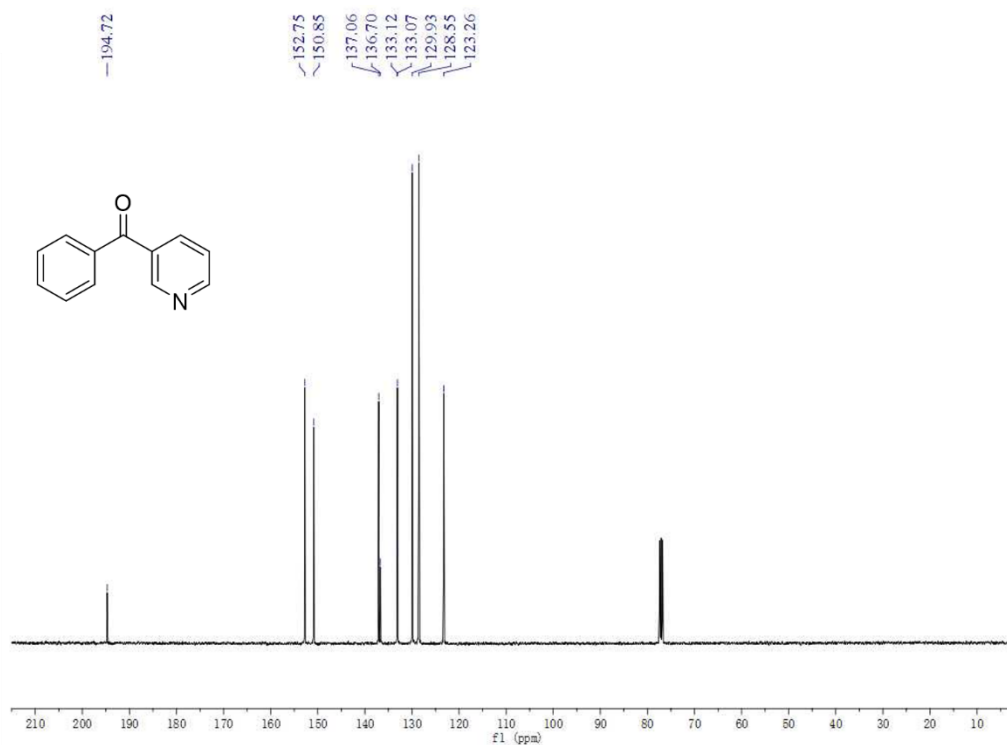

$^1\text{H}$  NMR spectrum of **4a** in  $\text{CDCl}_3$  at 400 MHz

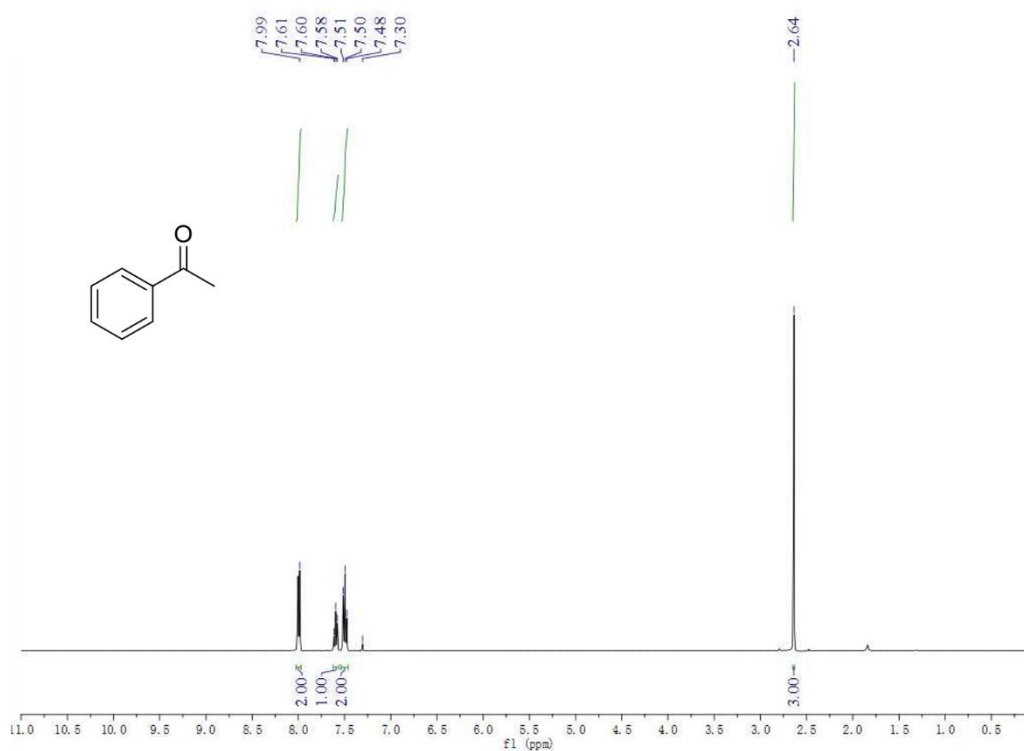

$^{13}\text{C}$  NMR spectrum of **4a** in  $\text{CDCl}_3$  at 101 MHz

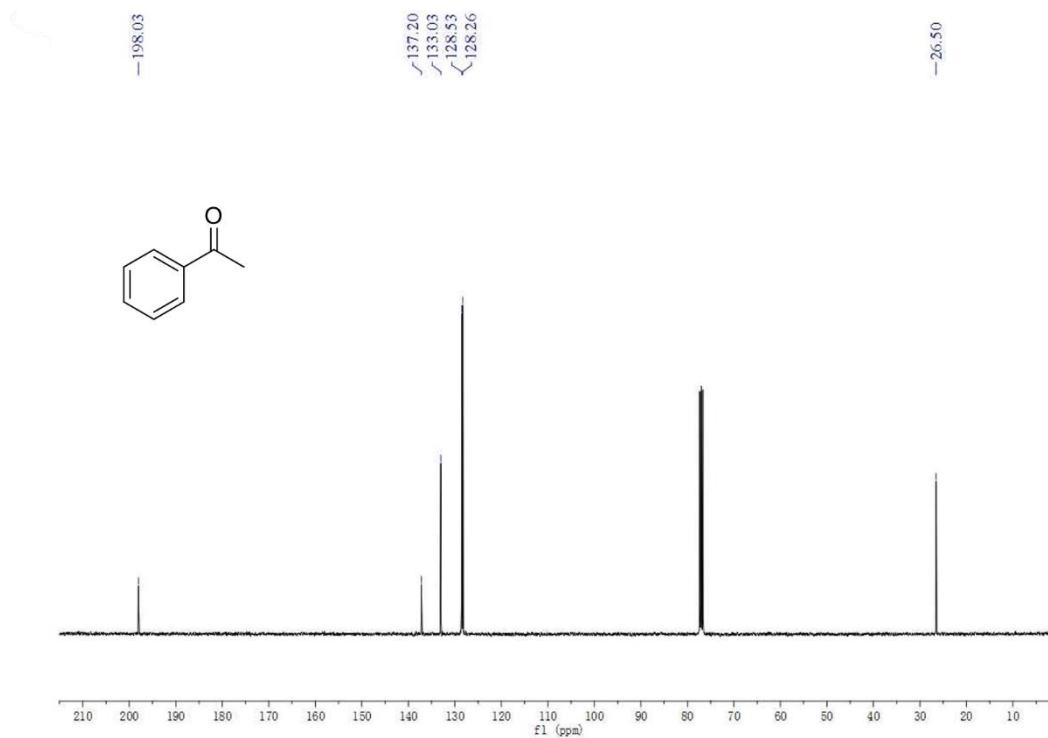

$^1\text{H}$  NMR spectrum of **4b** in  $\text{CDCl}_3$  at 400 MHz

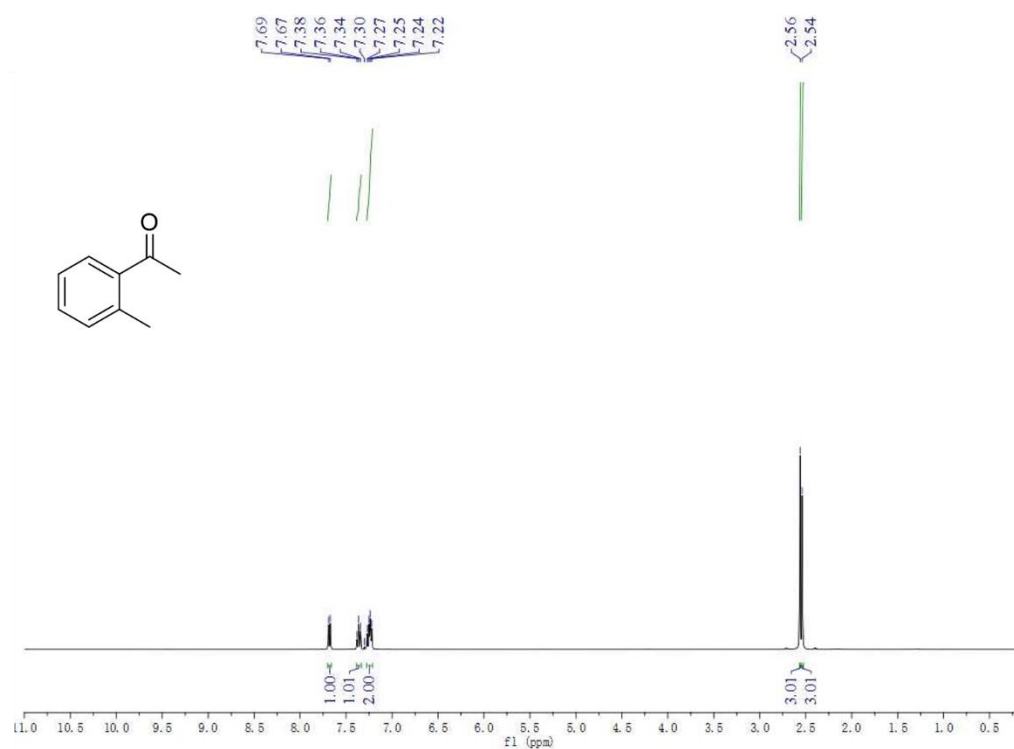

$^{13}\text{C}$  NMR spectrum of **4b** in  $\text{CDCl}_3$  at 101 MHz

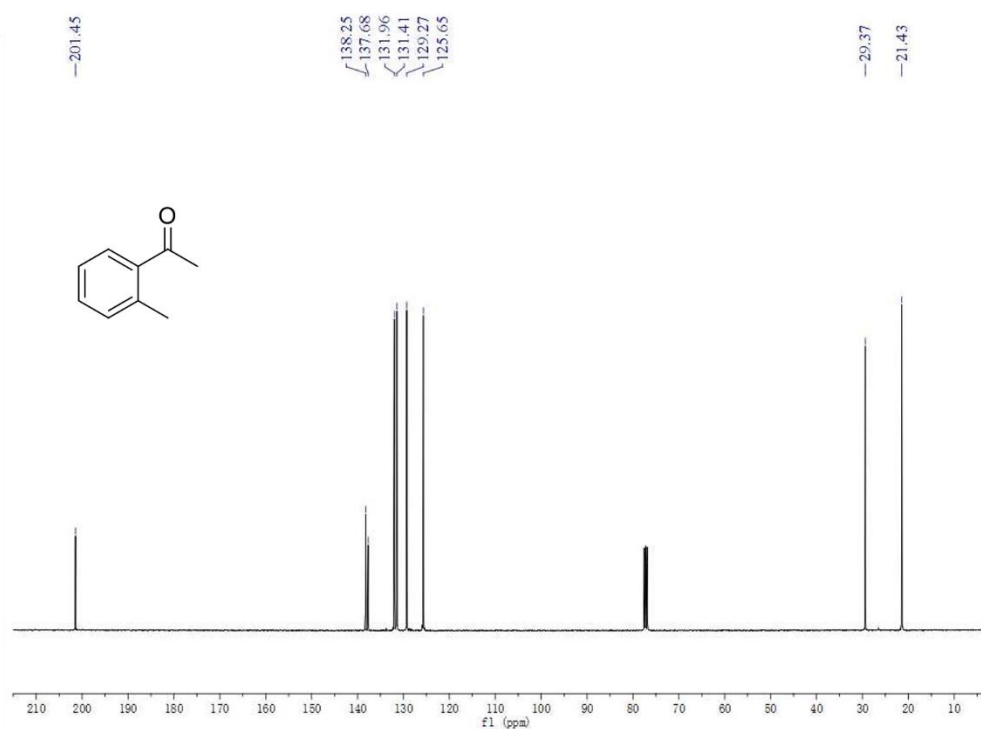

$^1\text{H}$  NMR spectrum of **4c** in  $\text{CDCl}_3$  at 400 MHz

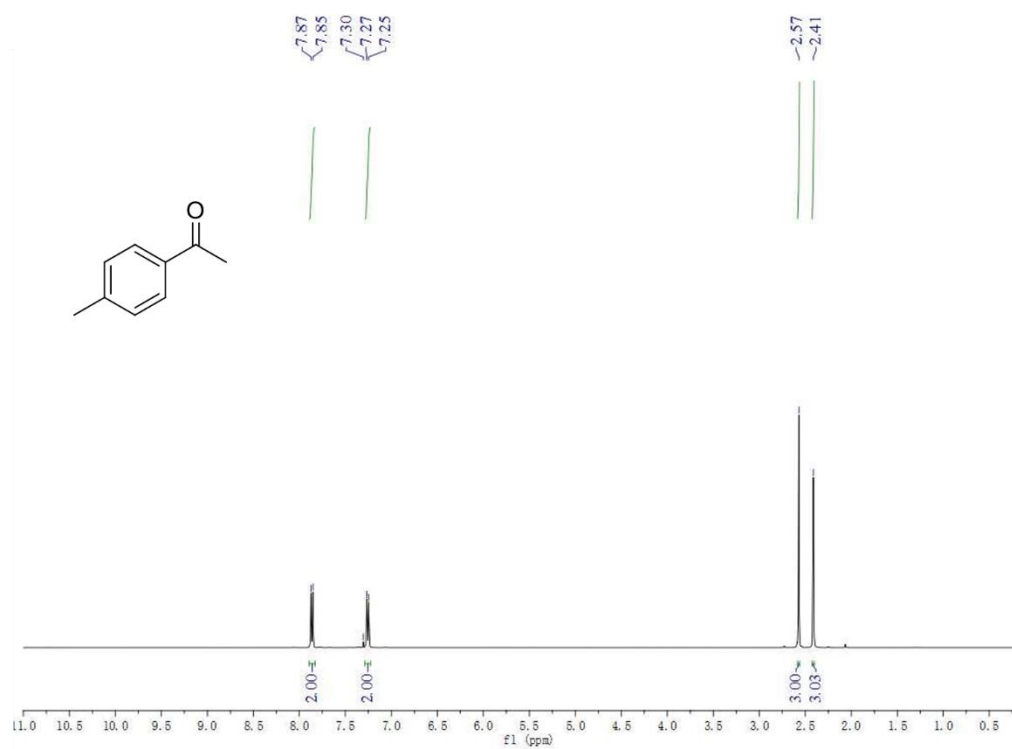

$^{13}\text{C}$  NMR spectrum of **4c** in  $\text{CDCl}_3$  at 101 MHz

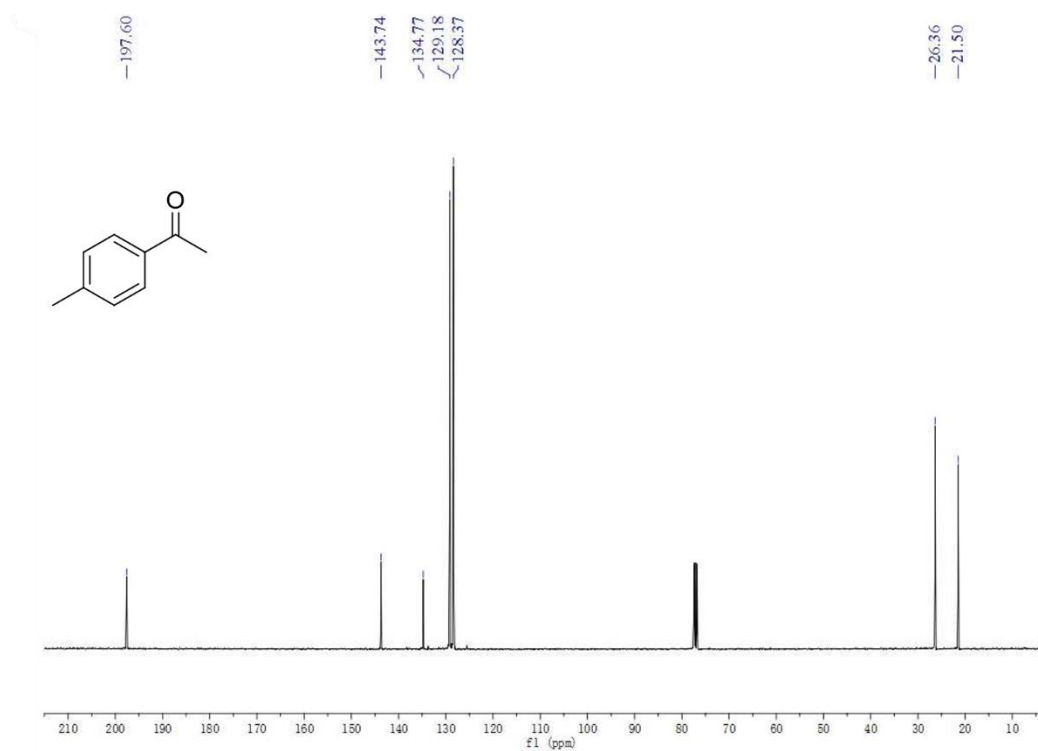

$^1\text{H}$  NMR spectrum of **4d** in  $\text{CDCl}_3$  at 400 MHz

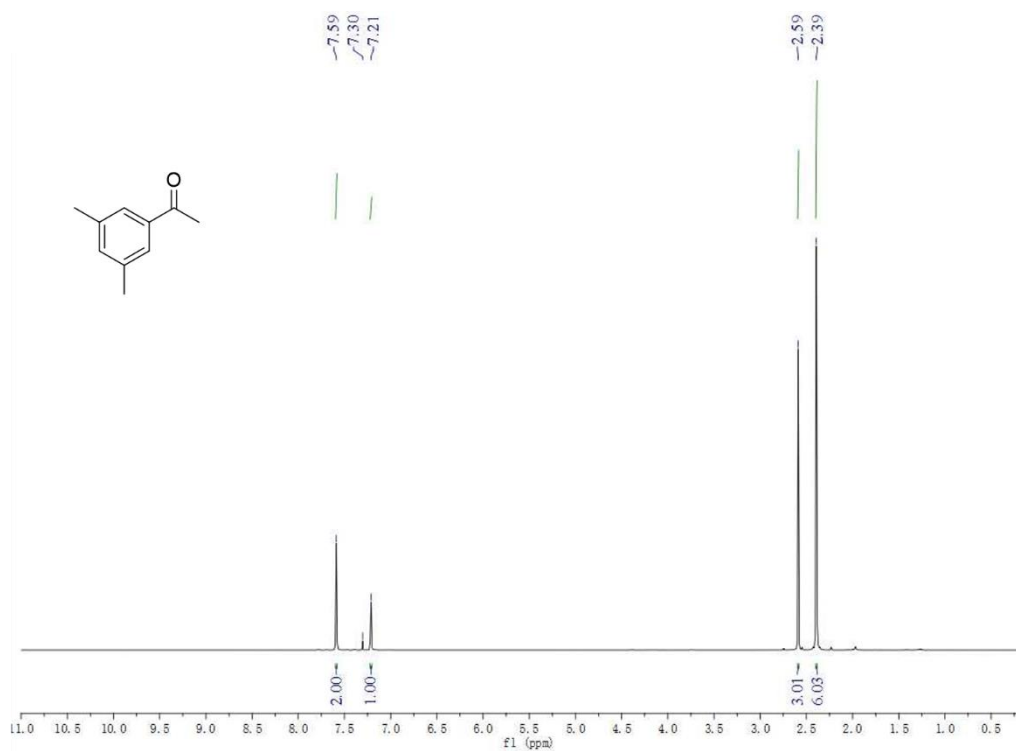

$^{13}\text{C}$  NMR spectrum of **4d** in  $\text{CDCl}_3$  at 101 MHz

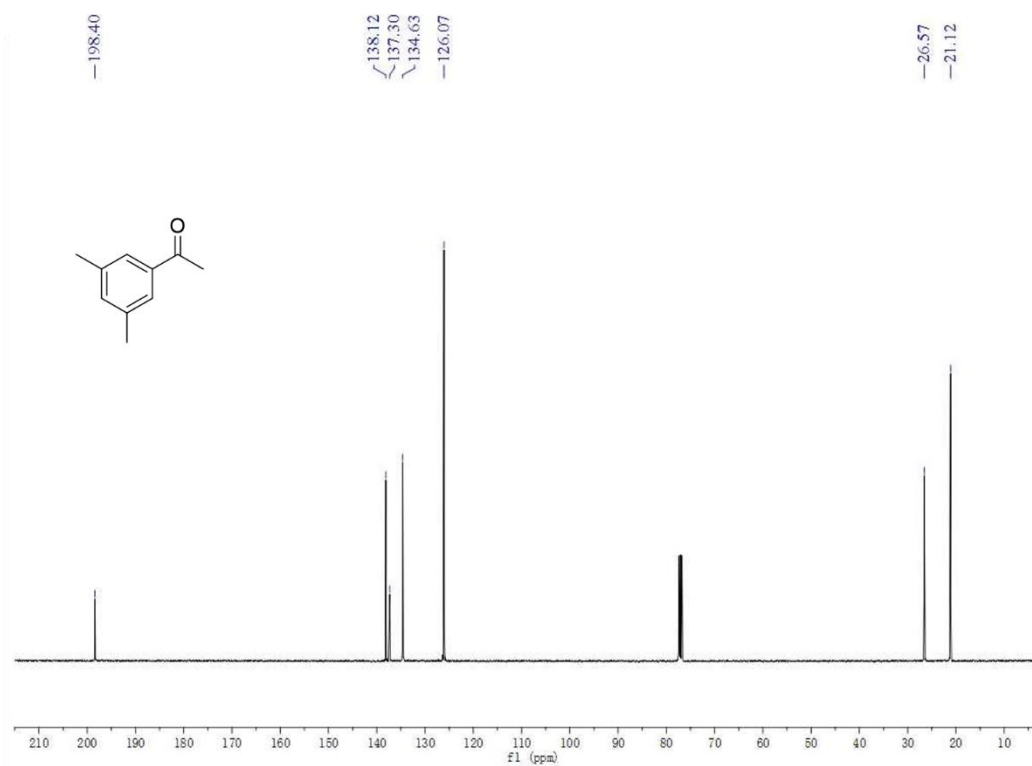

$^1\text{H}$  NMR spectrum of **4e** in  $\text{CDCl}_3$  at 400 MHz

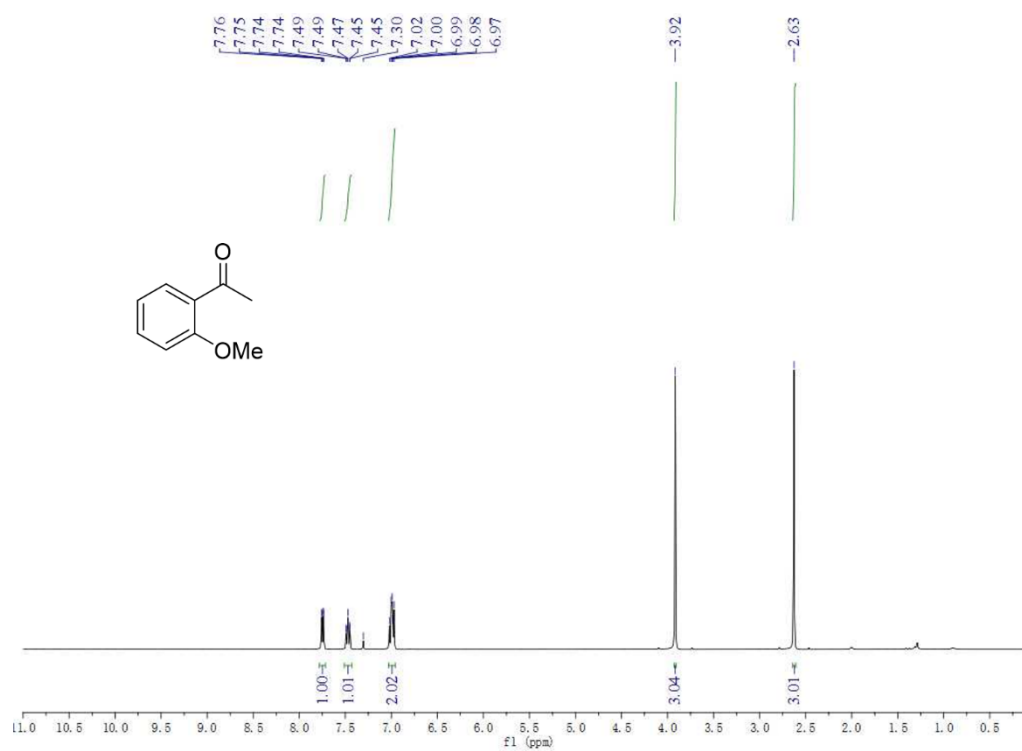

$^{13}\text{C}$  NMR spectrum of **4e** in  $\text{CDCl}_3$  at 101 MHz

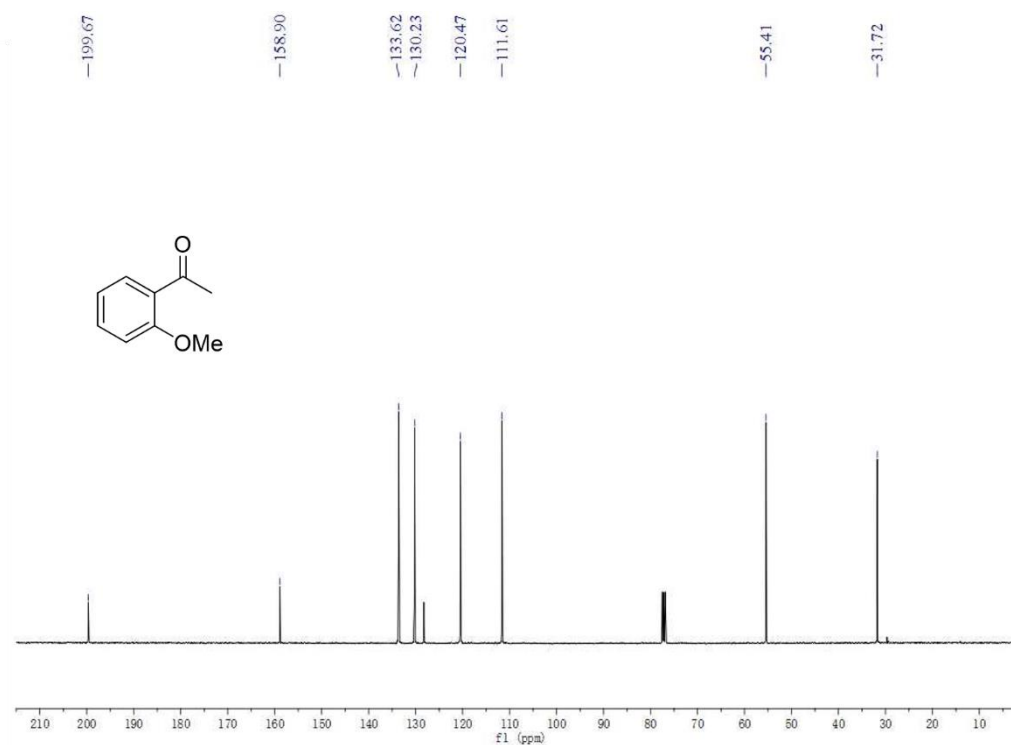

$^1\text{H}$  NMR spectrum of **4f** in  $\text{CDCl}_3$  at 400 MHz

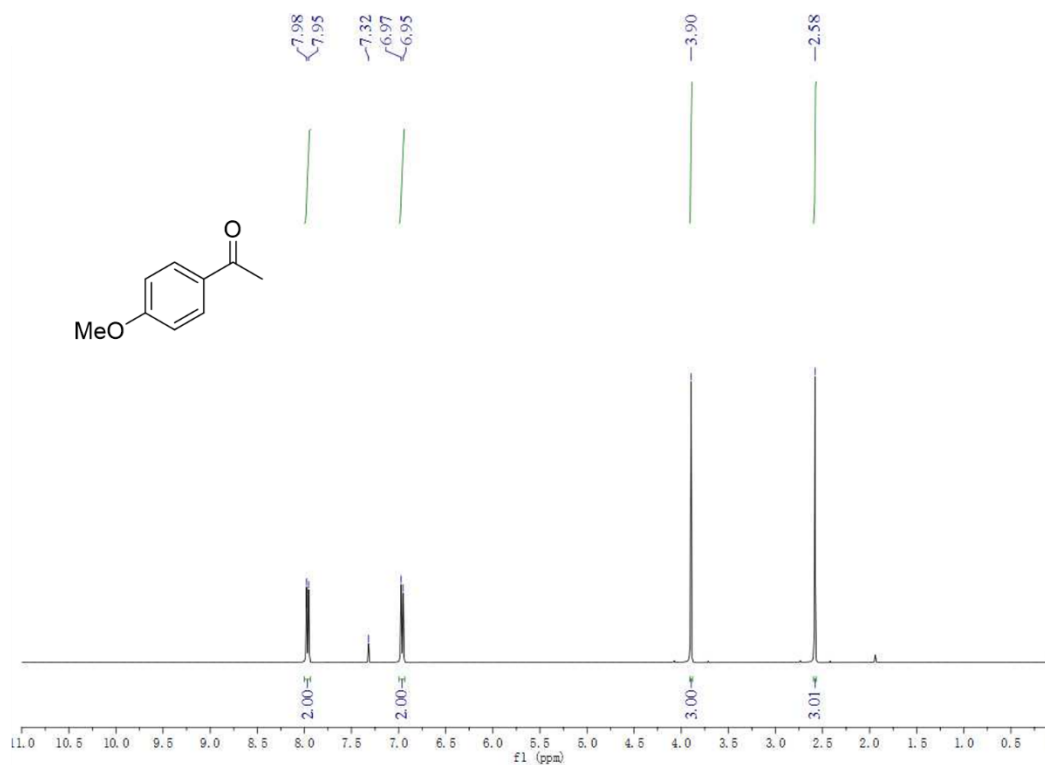

$^{13}\text{C}$  NMR spectrum of **4f** in  $\text{CDCl}_3$  at 101 MHz

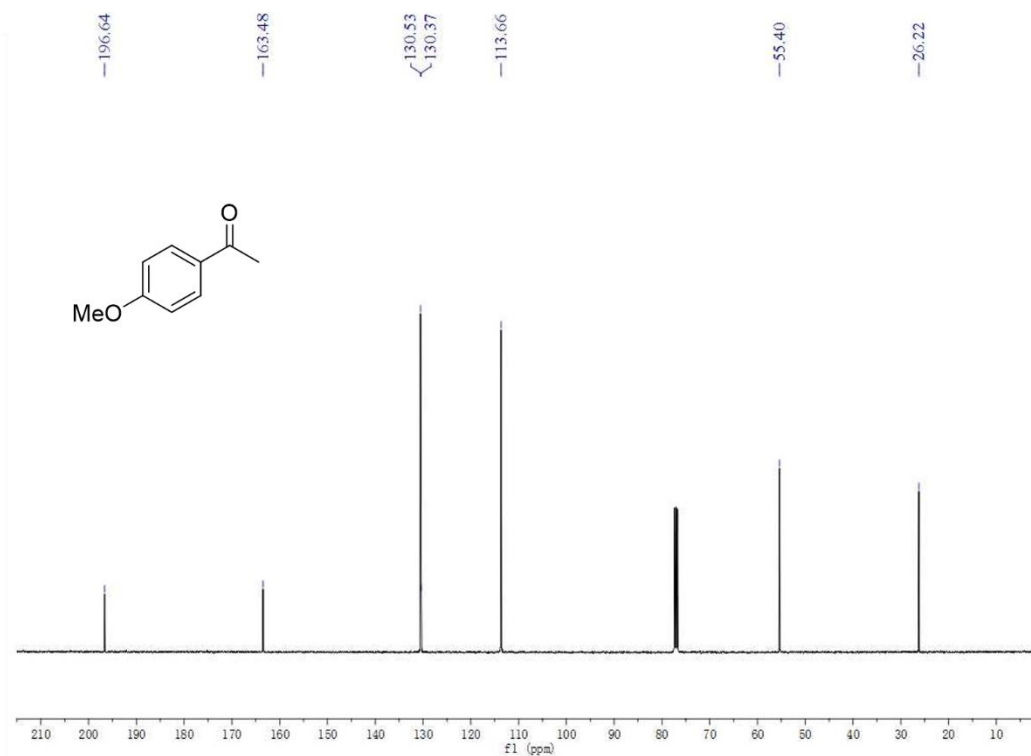

$^1\text{H}$  NMR spectrum of **4g** in  $\text{CDCl}_3$  at 400 MHz

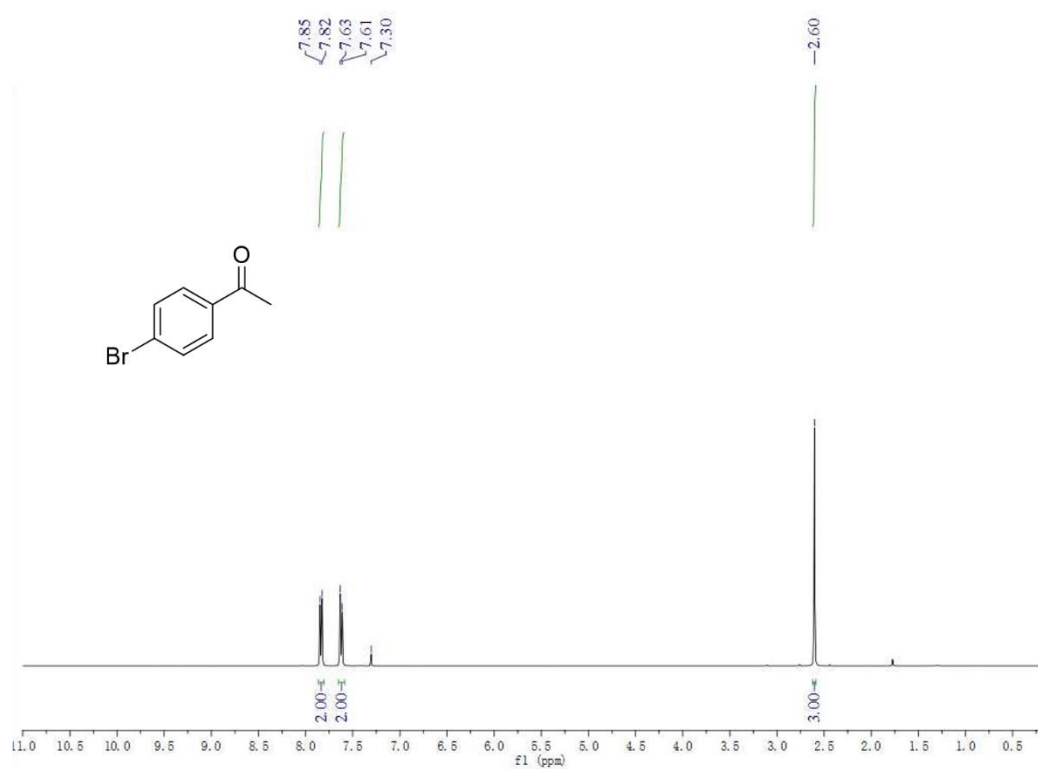

$^{13}\text{C}$  NMR spectrum of **4g** in  $\text{CDCl}_3$  at 101 MHz

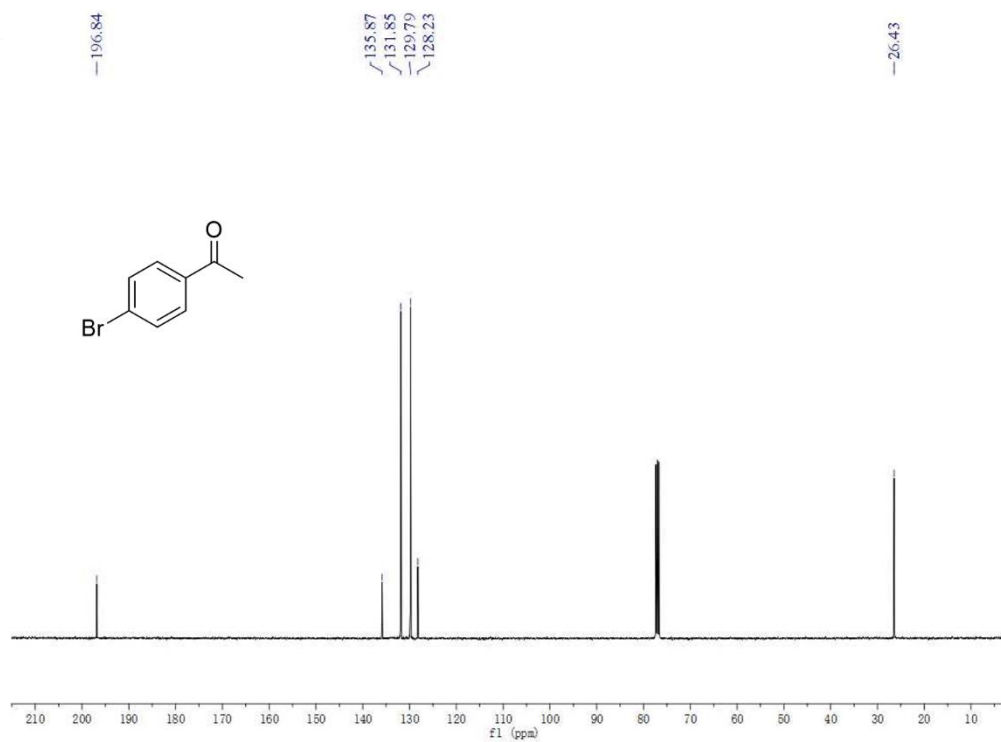

$^1\text{H}$  NMR spectrum of **4h** in  $\text{CDCl}_3$  at 400 MHz

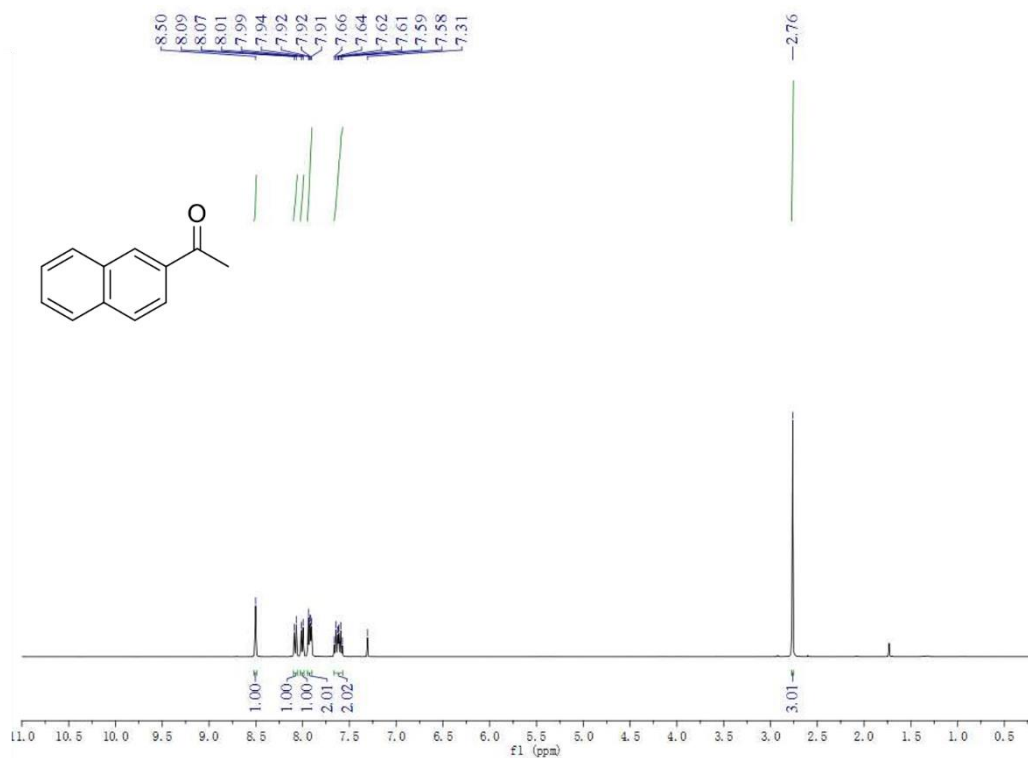

$^{13}\text{C}$  NMR spectrum of **4h** in  $\text{CDCl}_3$  at 101 MHz

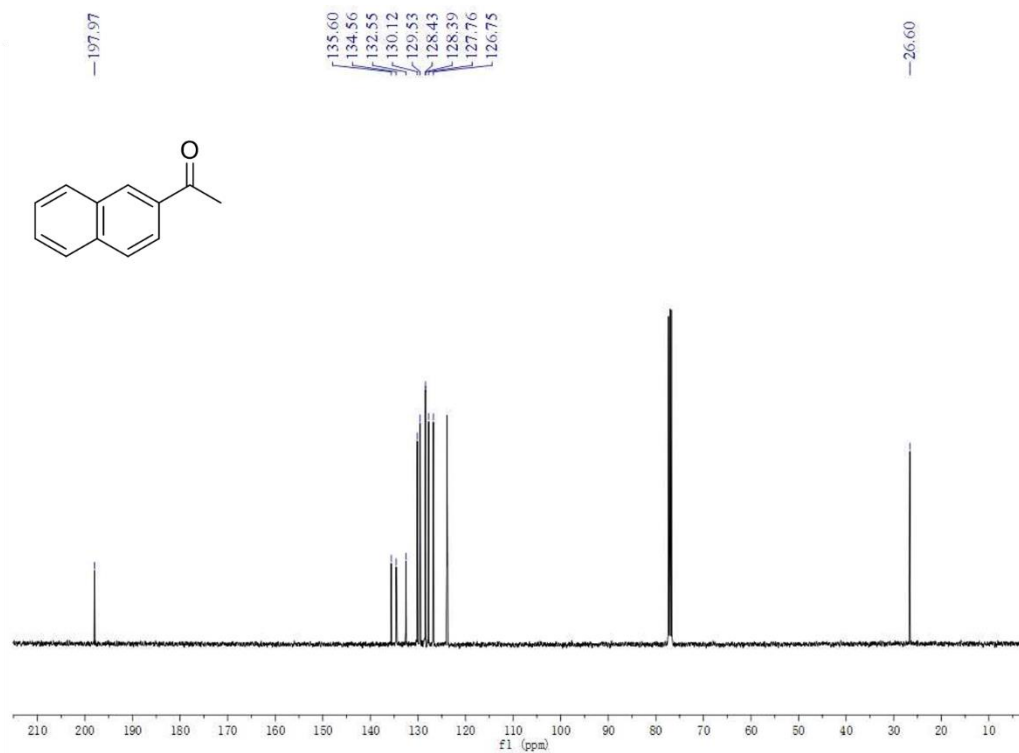

$^1\text{H}$  NMR spectrum of **4i** in  $\text{CDCl}_3$  at 400 MHz

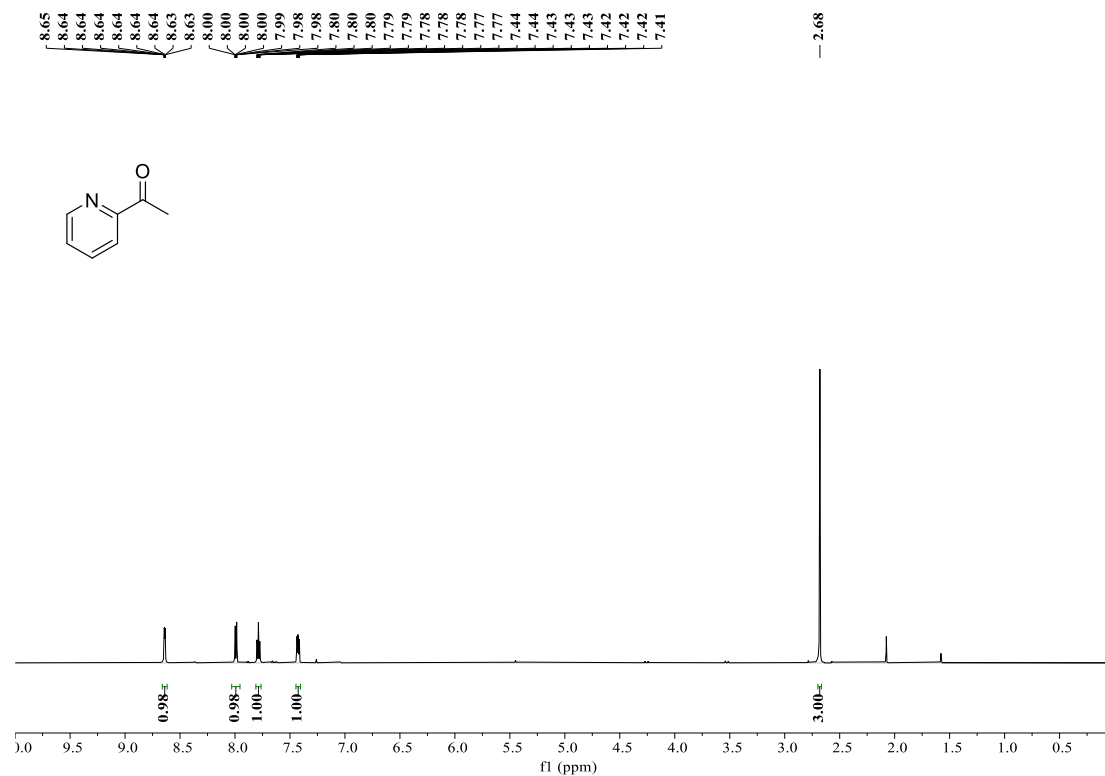

$^{13}\text{C}$  NMR spectrum of **4i** in  $\text{CDCl}_3$  at 151 MHz

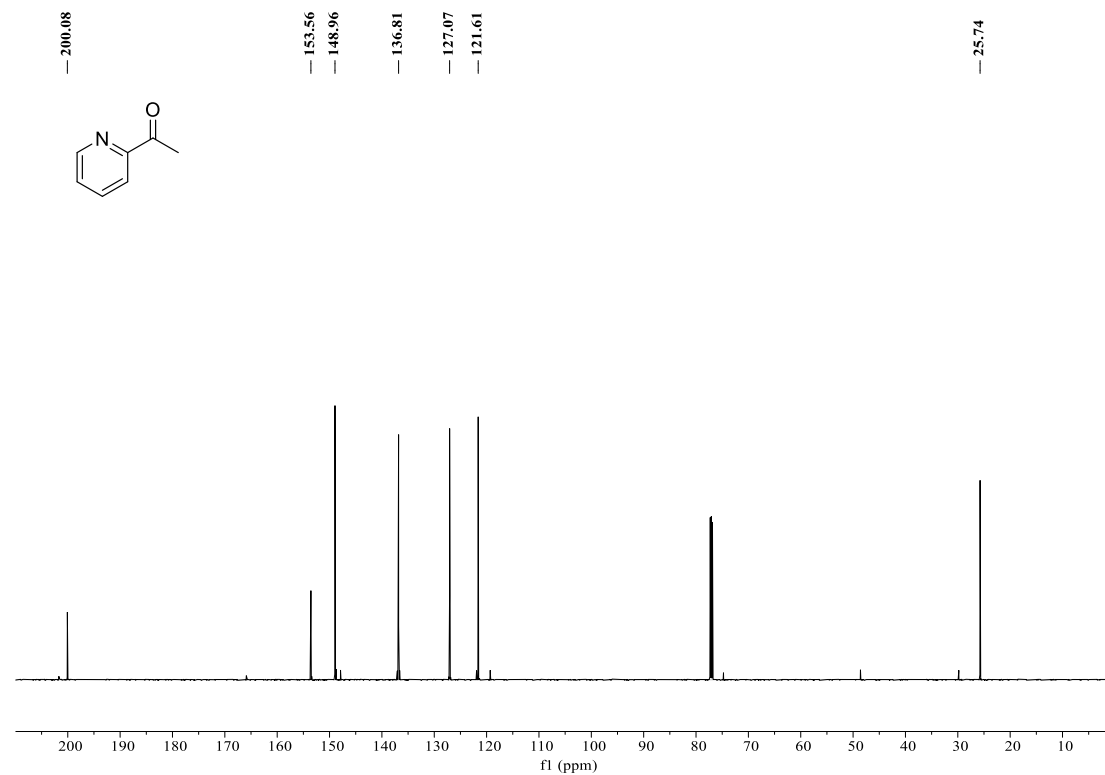

$^1\text{H}$  NMR spectrum of **4j** in  $\text{CDCl}_3$  at 400 MHz

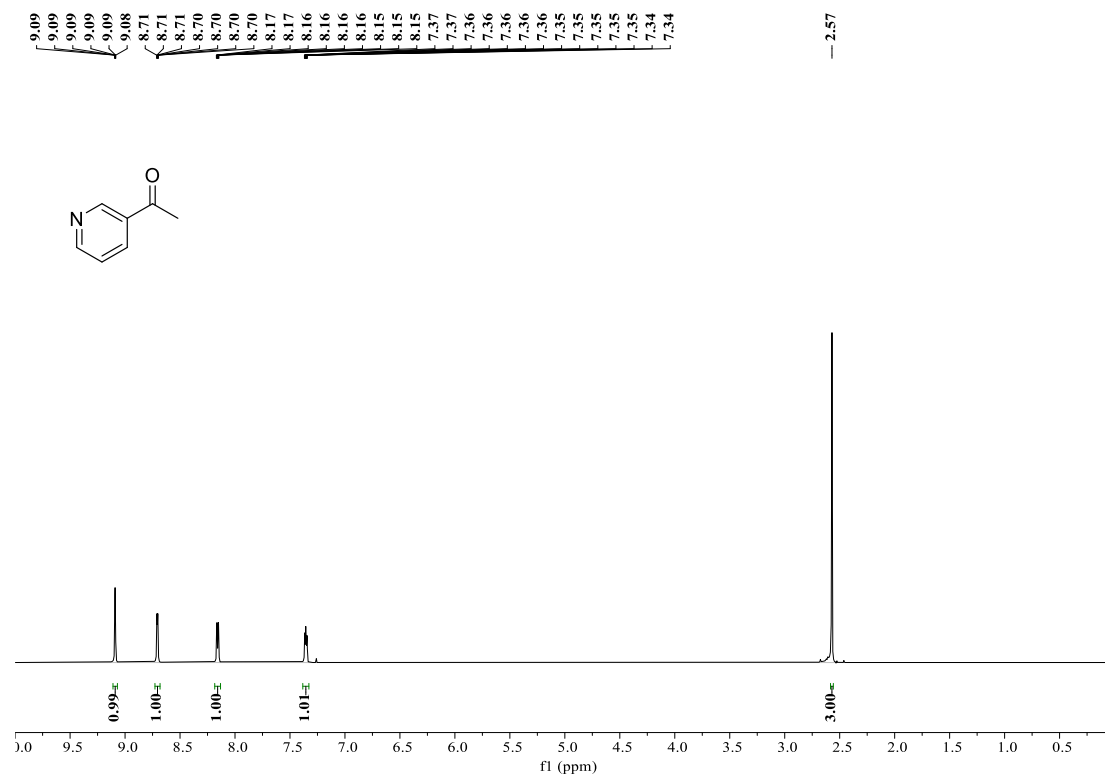

$^{13}\text{C}$  NMR spectrum of **4j** in  $\text{CDCl}_3$  at 151 MHz

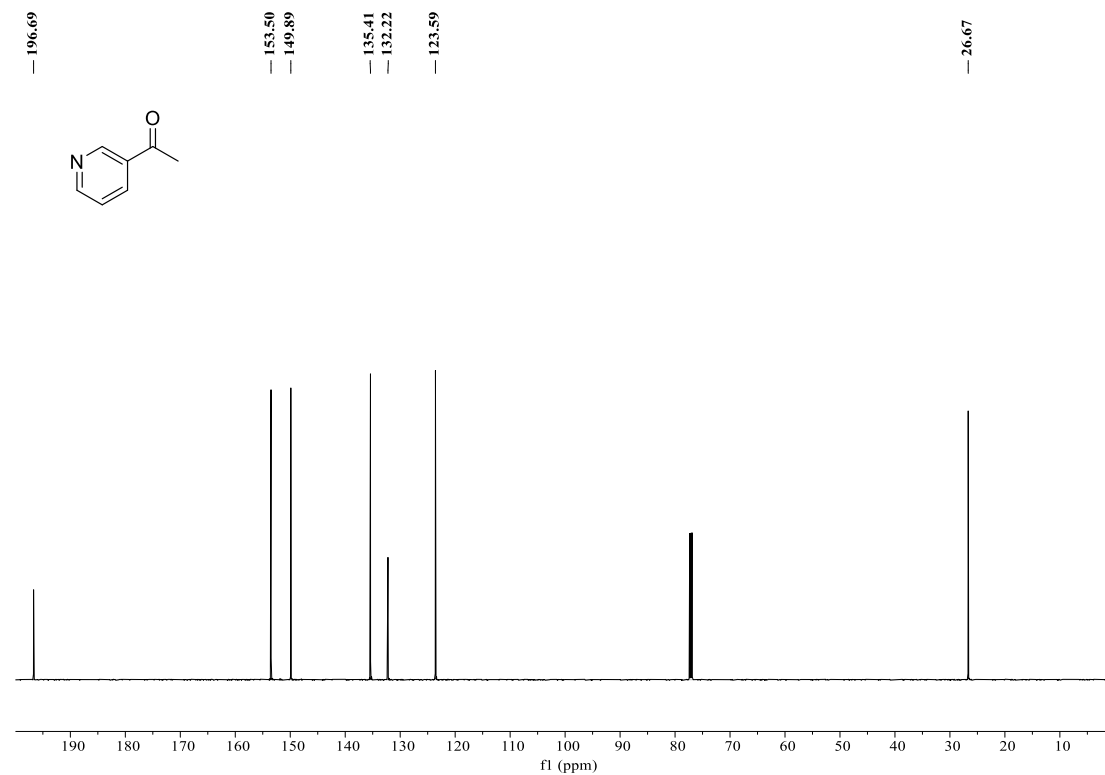

$^1\text{H}$  NMR spectrum of **4k** in  $\text{CDCl}_3$  at 400 MHz

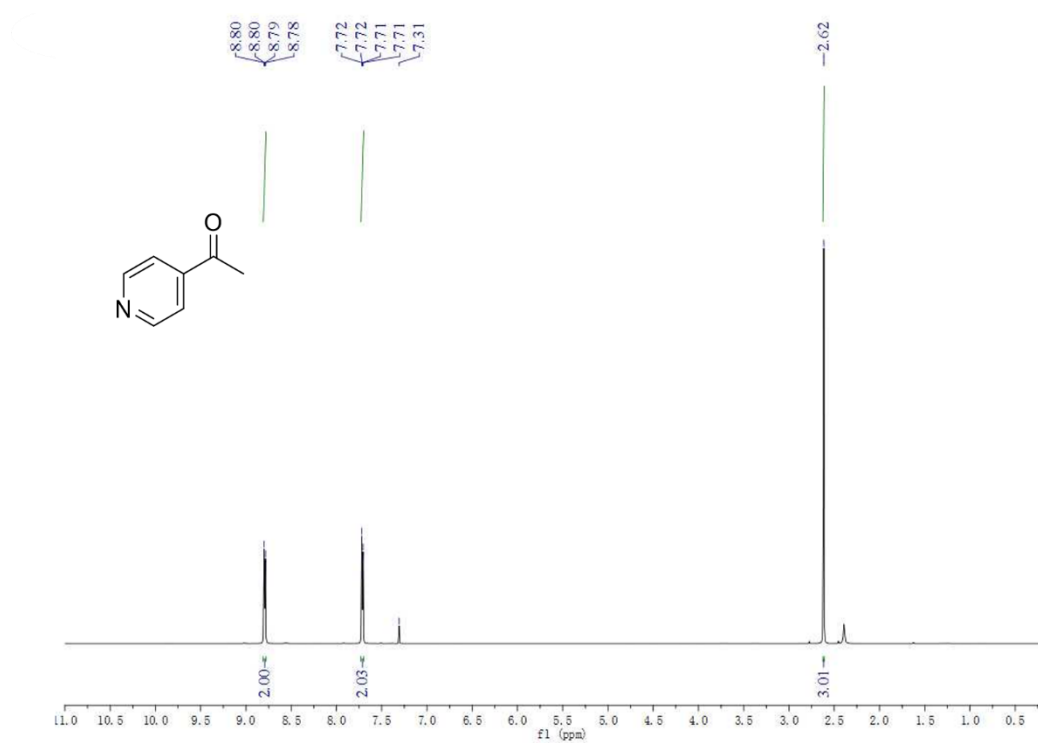

$^{13}\text{C}$  NMR spectrum of **4k** in  $\text{CDCl}_3$  at 101 MHz

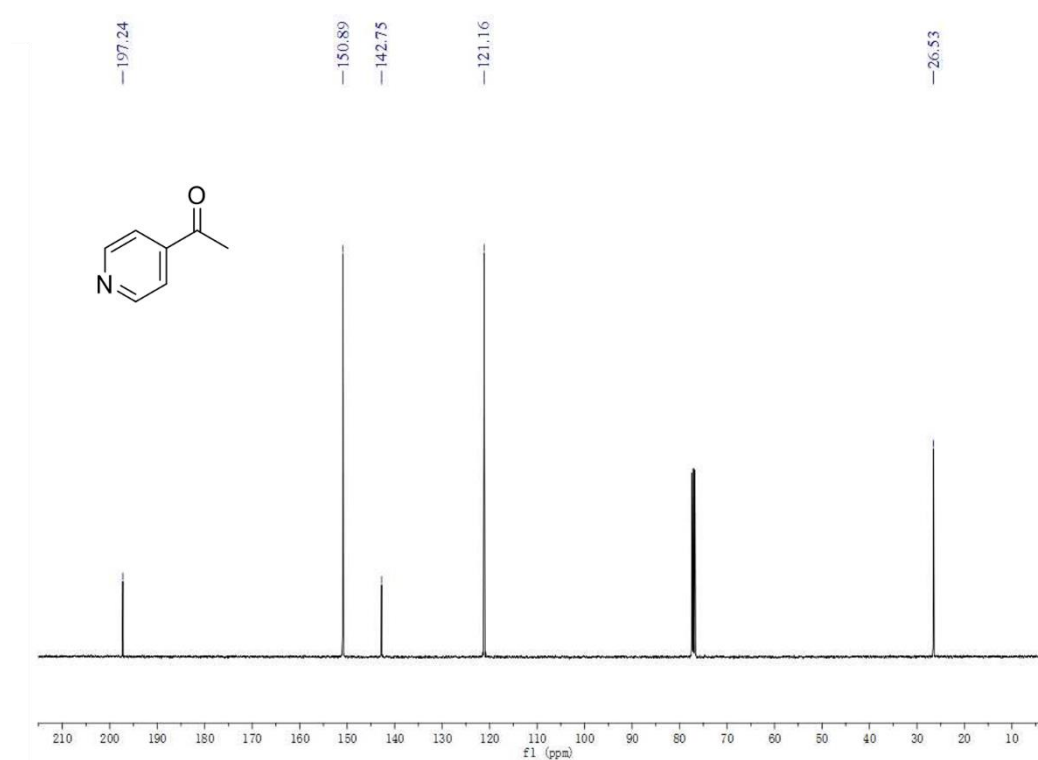

$^1\text{H}$  NMR spectrum of **4l** in  $\text{CDCl}_3$  at 400 MHz

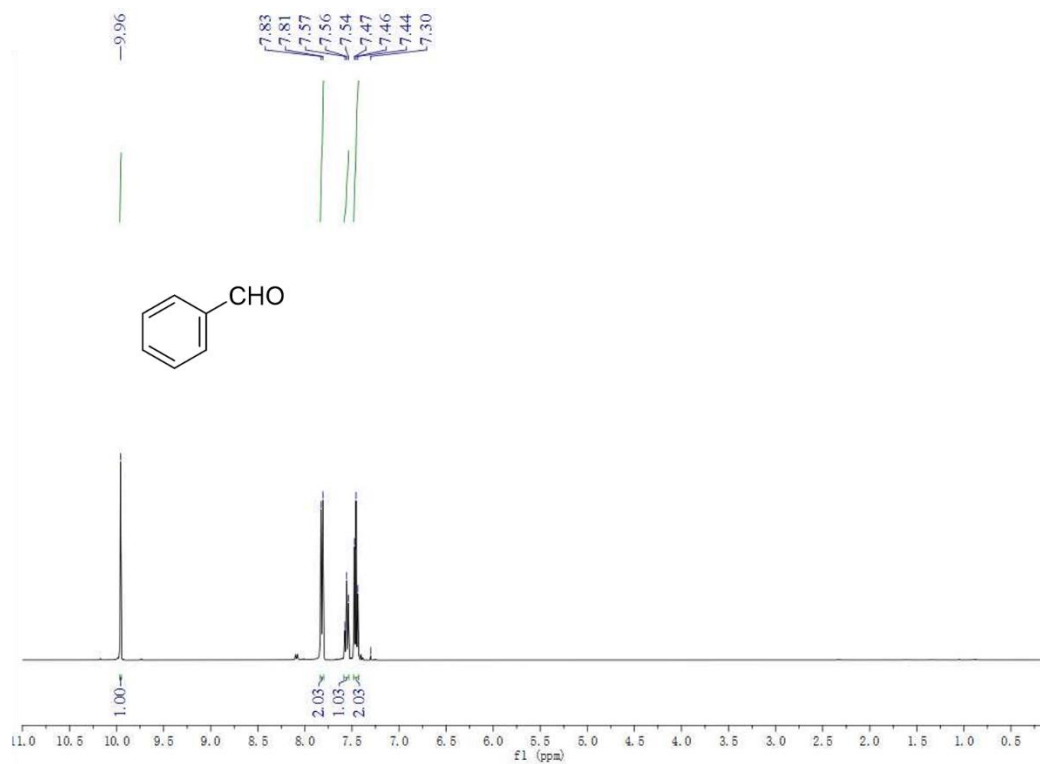

$^{13}\text{C}$  NMR spectrum of **4l** in  $\text{CDCl}_3$  at 101 MHz

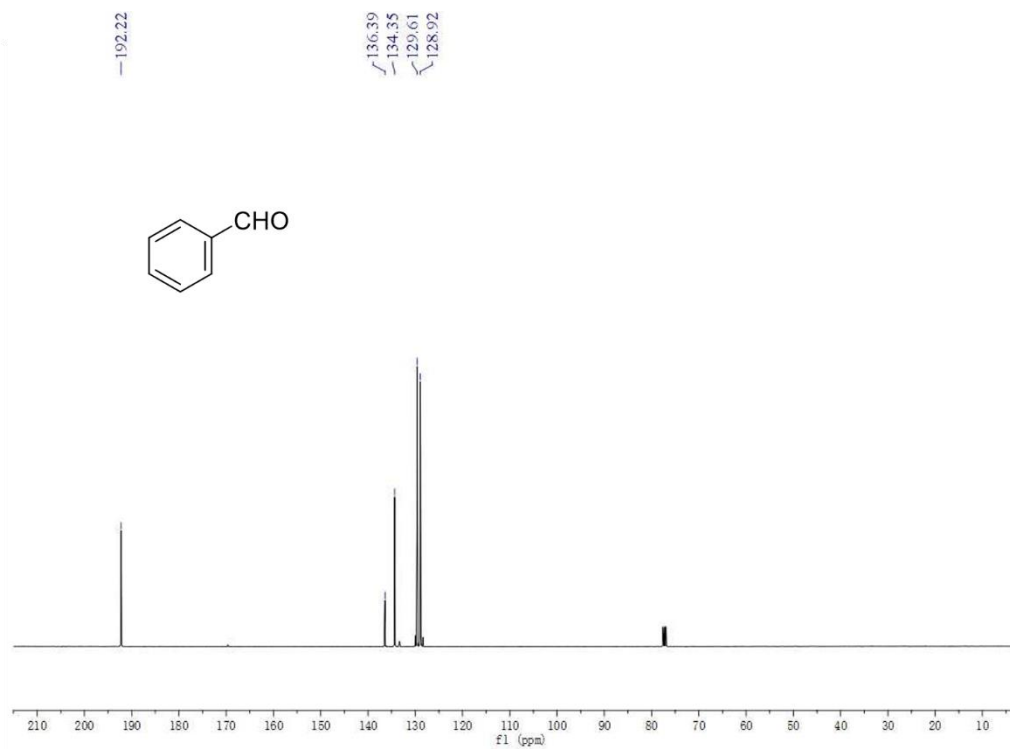

$^1\text{H}$  NMR spectrum of **4m** in  $\text{CDCl}_3$  at 400 MHz

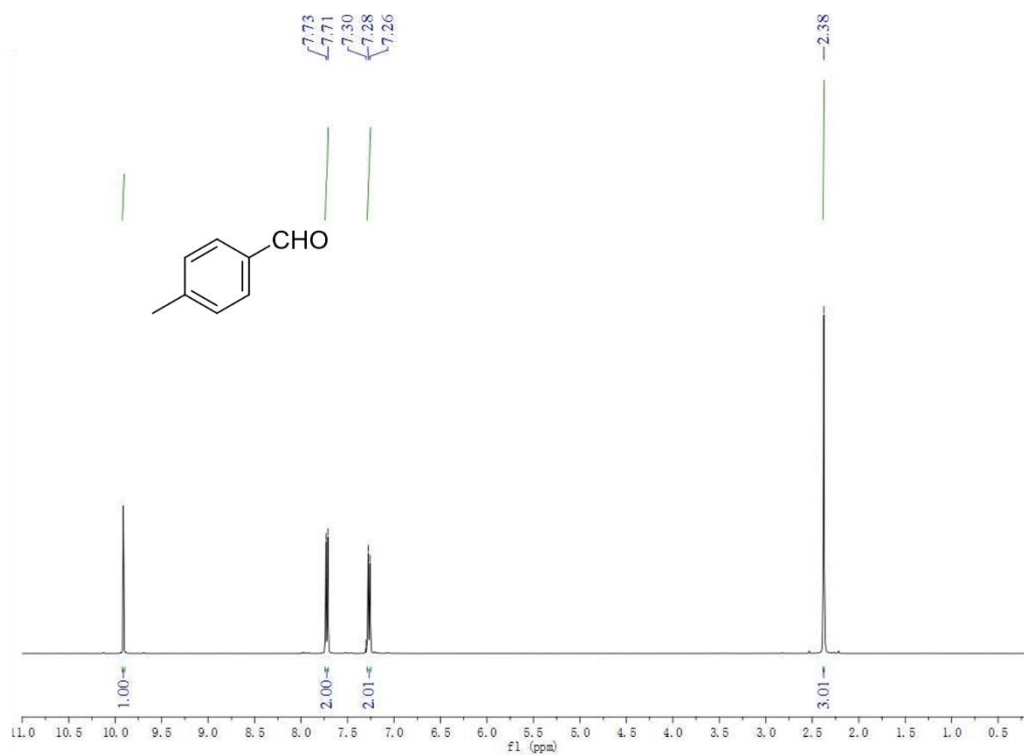

$^{13}\text{C}$  NMR spectrum of **4m** in  $\text{CDCl}_3$  at 101 MHz

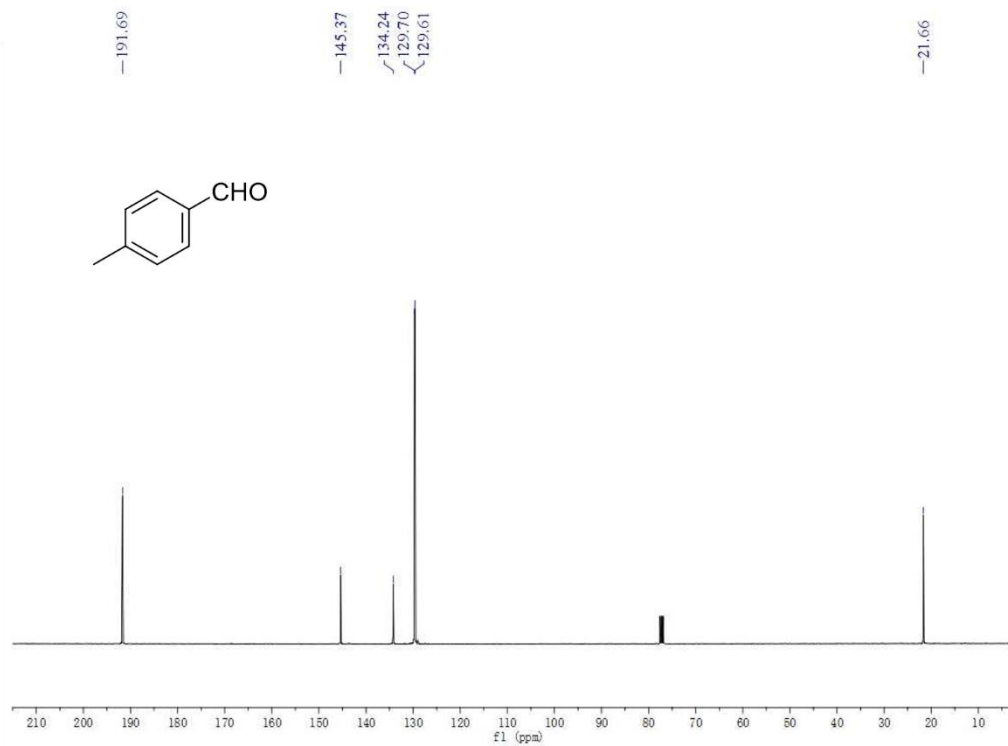

$^1\text{H}$  NMR spectrum of **4n** in  $\text{CDCl}_3$  at 400 MHz

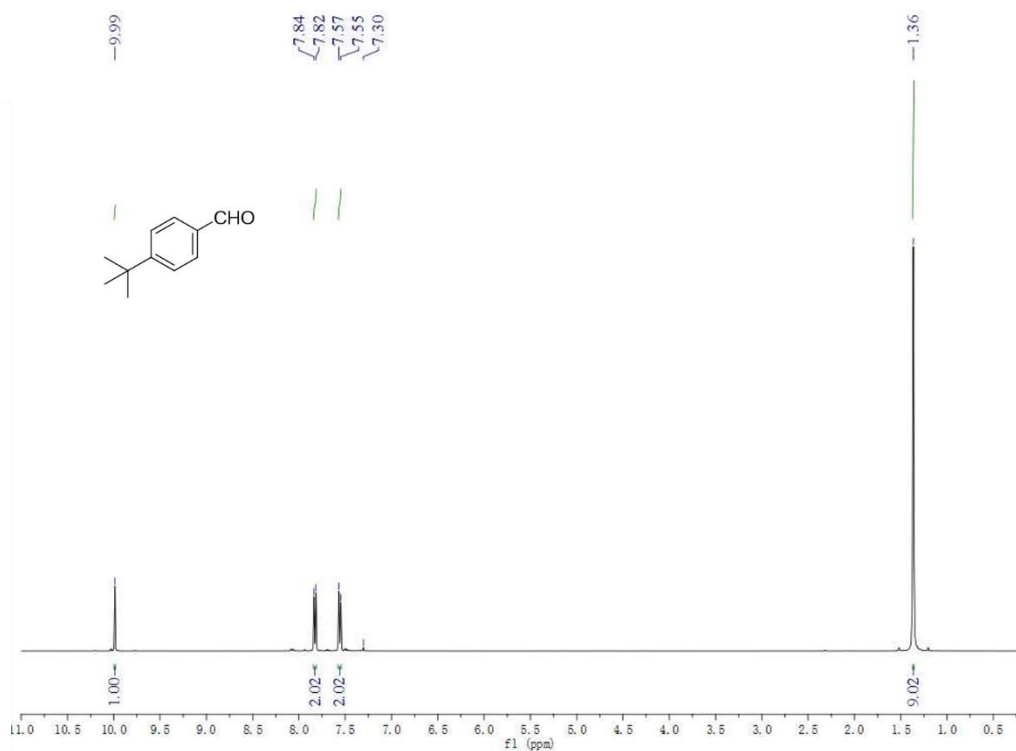

$^{13}\text{C}$  NMR spectrum of **4n** in  $\text{CDCl}_3$  at 101 MHz

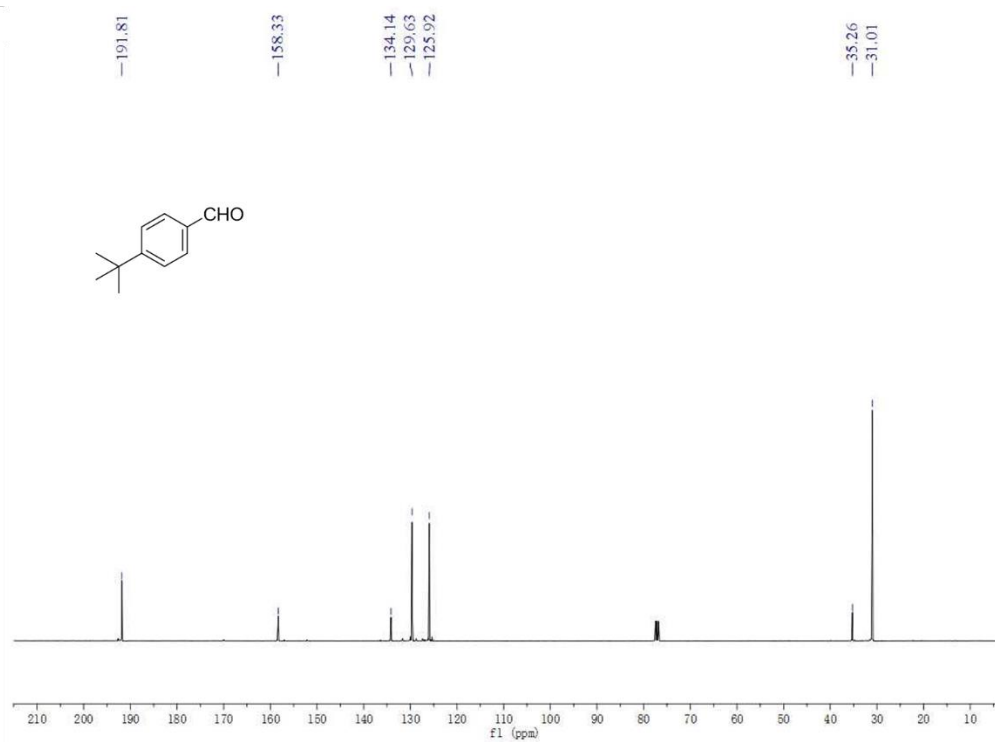

$^1\text{H}$  NMR spectrum of **4o** in  $\text{CDCl}_3$  at 400 MHz

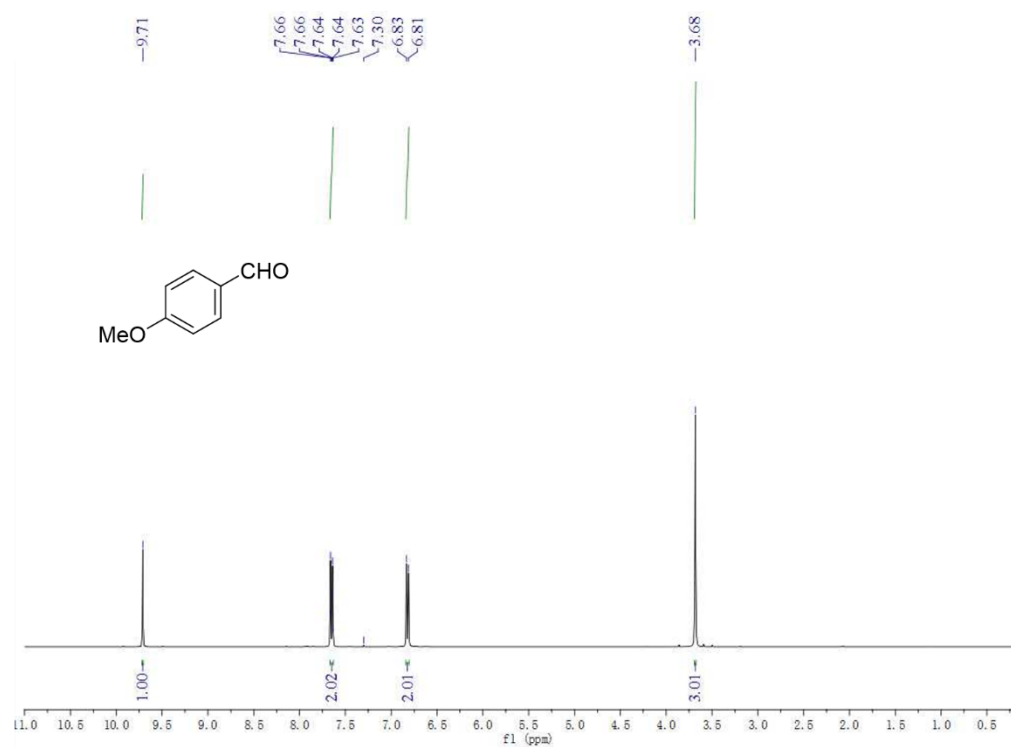

$^{13}\text{C}$  NMR spectrum of **4o** in  $\text{CDCl}_3$  at 101 MHz

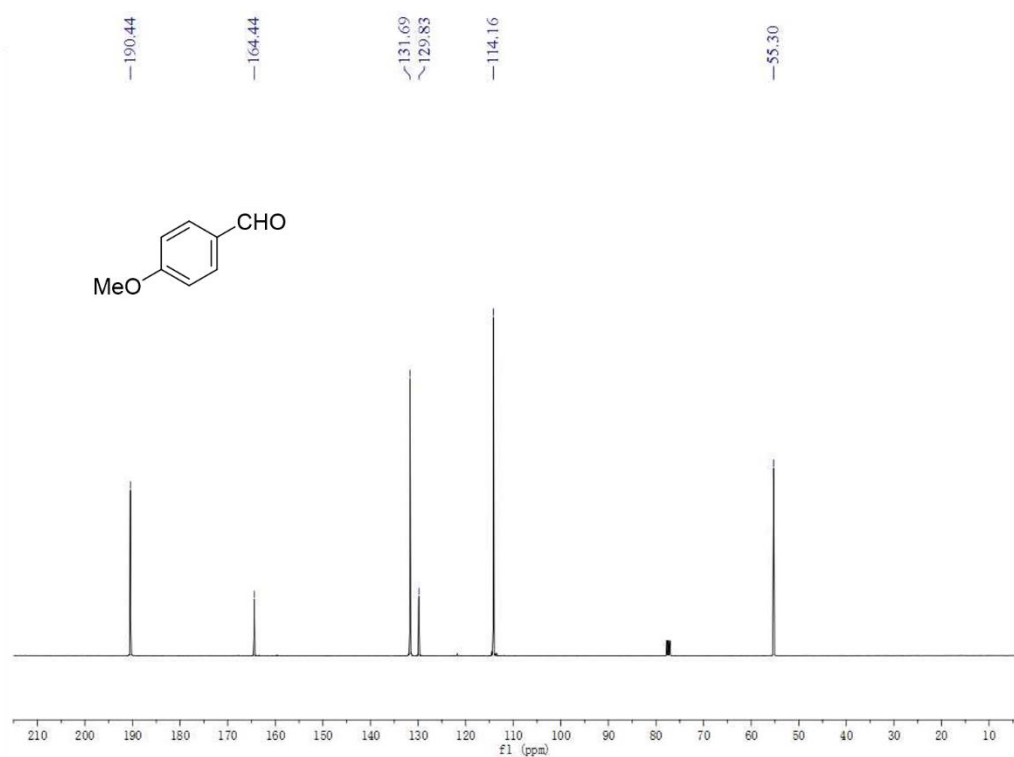

$^1\text{H}$  NMR spectrum of **4p** in  $\text{CDCl}_3$  at 400 MHz

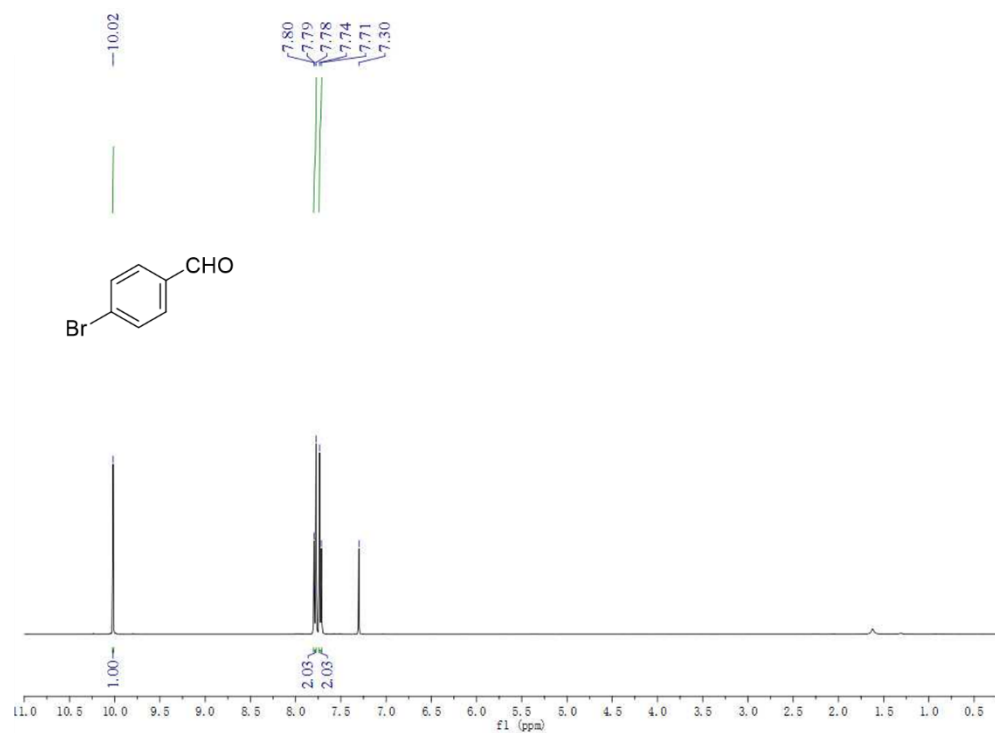

$^{13}\text{C}$  NMR spectrum of **4p** in  $\text{CDCl}_3$  at 101 MHz

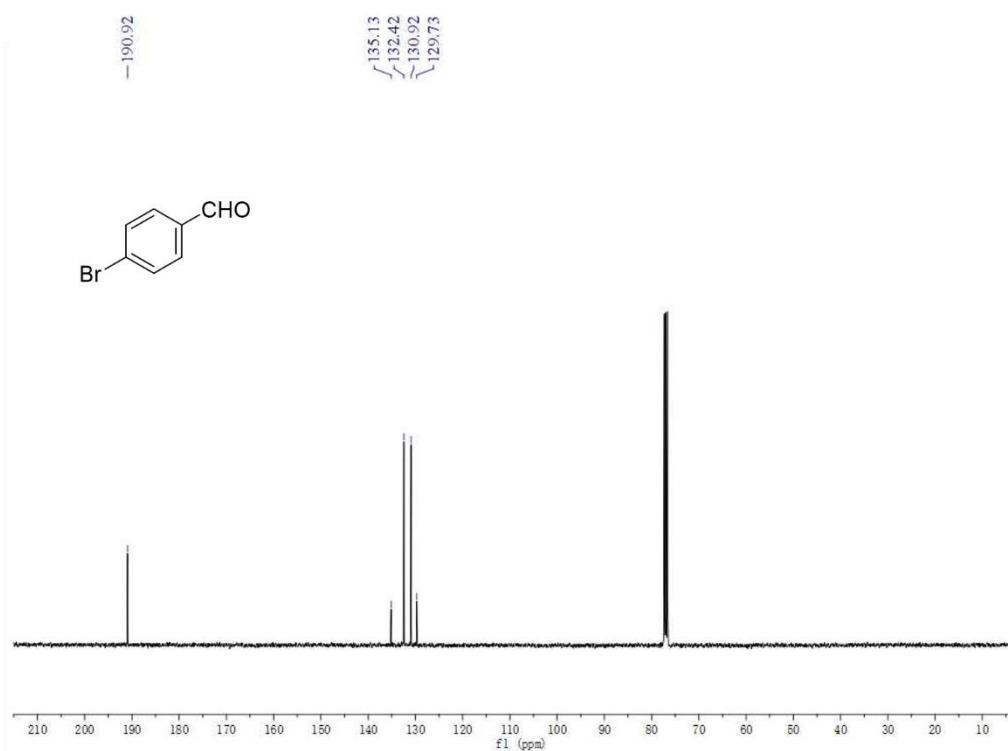

$^1\text{H}$  NMR spectrum of **4q** in  $\text{CDCl}_3$  at 400 MHz

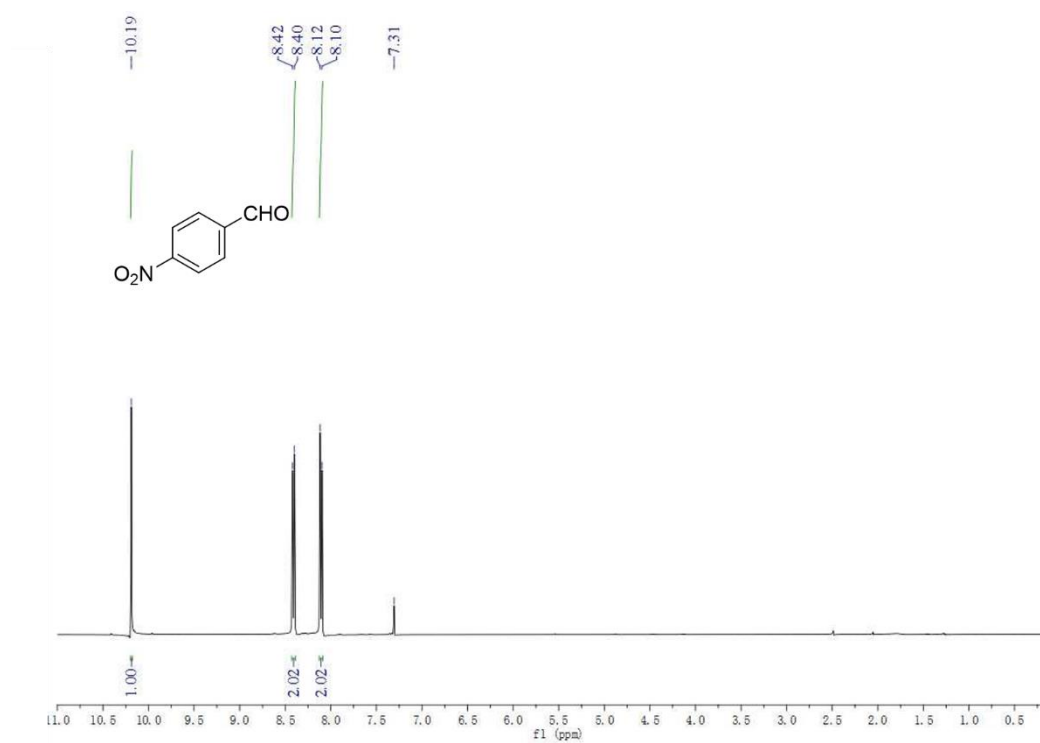

$^{13}\text{C}$  NMR spectrum of **4q** in  $\text{CDCl}_3$  at 101 MHz

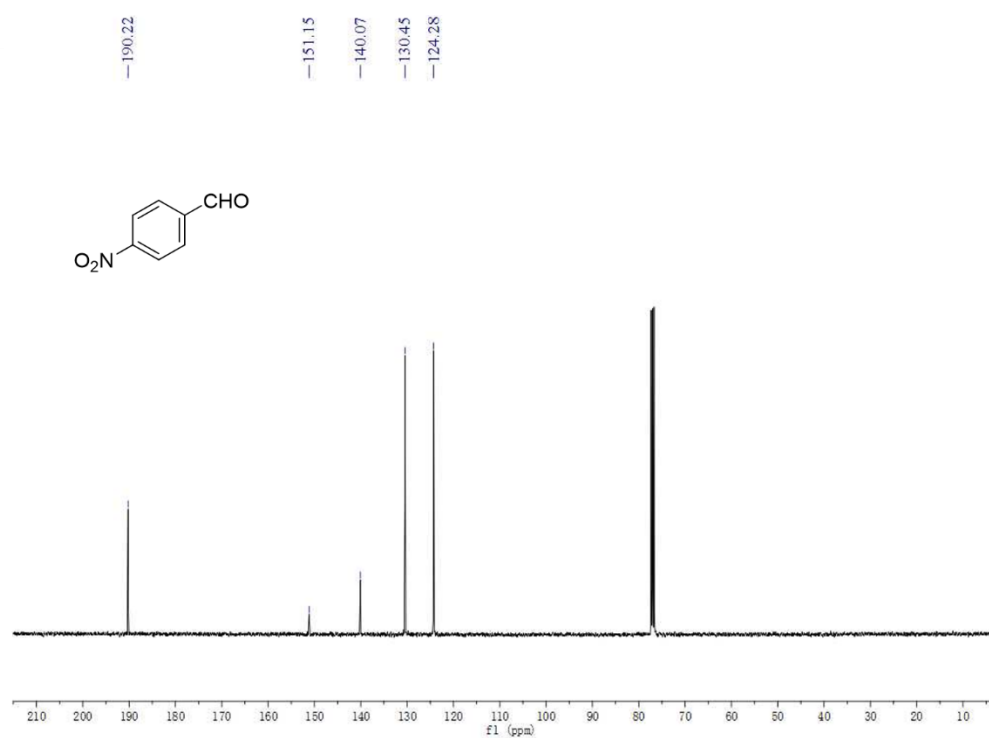

Supplement: d1ob01002f1.pdf [file d1ob01002f1.pdf]
